# Supplementary material
Source: publisher figshare collection journal article supplement (https://acs.figshare.com/ndownloader/files/4401502)

# Synthesis of Dibenzazepinones by Palladium-Catalyzed Intramolecular Arylation of *o*-(2'-Bromophenyl)anilide Enolates

*Xiaohong Pan and Craig S. Wilcox\**

Department of Chemistry, University of Pittsburgh, Pittsburgh, Pennsylvania 15260

## Supporting Information

| Table of Contents                                           | Page |
|-------------------------------------------------------------|------|
| General Information                                         | S1   |
| <sup>1</sup> H and <sup>13</sup> C NMR spectra of compounds | S3   |

### General Information:

Commercially available reagents and solvents were used as received without further purification. Reactions at “room temperature” were conducted under ambient laboratory conditions T = 20-27 °C, p = 720-770 mmHg. References to “removal of volatile components” refer to rotary evaporation of the sample at 25-65 °C *in vacuo* (18-25 mmHg). Thin layer chromatography (TLC) was performed on silica gel 60 F254 glass backed plates with a layer thickness of 0.25 mm manufactured by EMD. Silica gel columns for flash chromatography, according to the method of Still, were prepared with SILICYCLE silica gel (SiliaFlash P60, 230-240 mesh). <sup>1</sup>H NMR spectra were recorded on a Bruker Avance 300 at 300 MHz and a Bruker DRX 500 at 500 MHz, and chemical shifts were given in parts per million (ppm) on the delta scale (δ) using TMS (Me<sub>4</sub>Si, 0.00). <sup>13</sup>C NMR spectra were recorded on a Bruker Avance 300 at 75 MHz, and chemical shifts are given in parts per million (ppm) on the delta

scale ( $\delta$ ) using deuterated solvents as internal standards ( $\text{CDCl}_3$ , 77.23), and the coupling constant values ( $J$ ) are in Hertz. Abbreviations for NMR data: s = singlet; d = doublet; t = triplet; q = quartet; dd = doublet of doublets; dt = doublet of triples; dq = doublet of quartets; tt = triplet of triplets; m = multiplet; br = broad. High resolution and low resolution mass spectra were recorded of a VG 7070 spectrometer. Infrared (IR) spectra were collected on an Avatar 360 Nicolet FT-IR spectrometer. Samples for IR were prepared as a thin film on a NaBr plate by dissolving the sample in  $\text{CH}_2\text{Cl}_2$  and then evaporating the  $\text{CH}_2\text{Cl}_2$ .

**5-Amino-N-methyl-dibenzazepin-6-one (1).**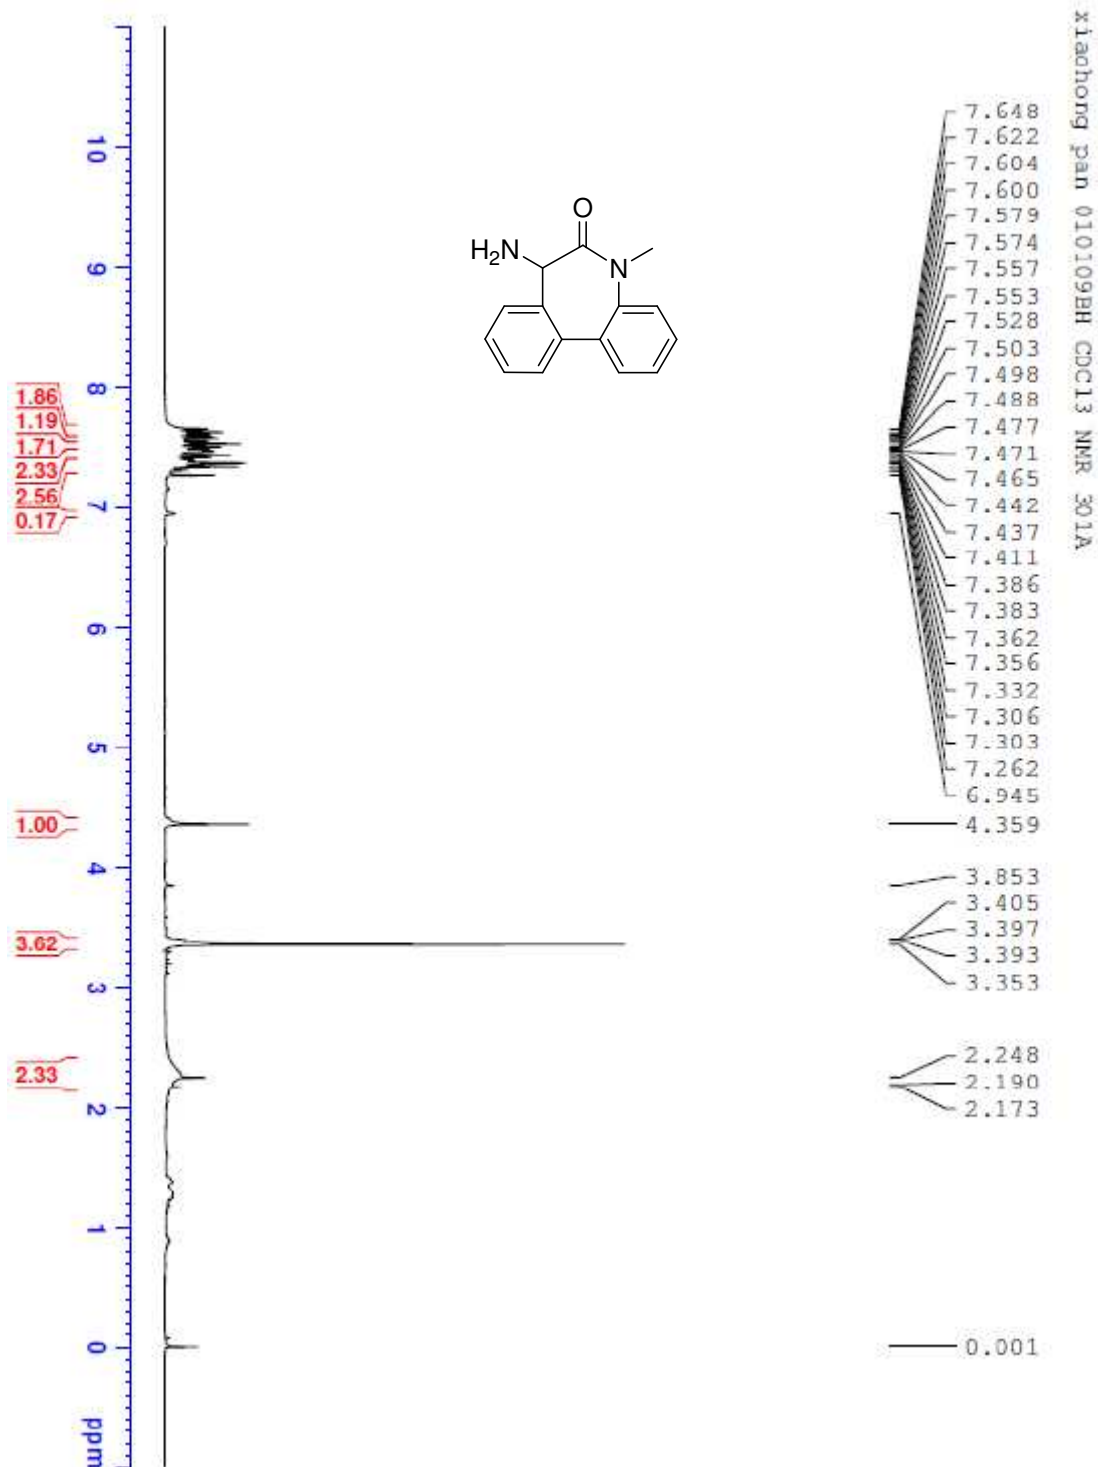

**[1,1'-Biphenyl]-2-amine, 2'-bromo- (2).**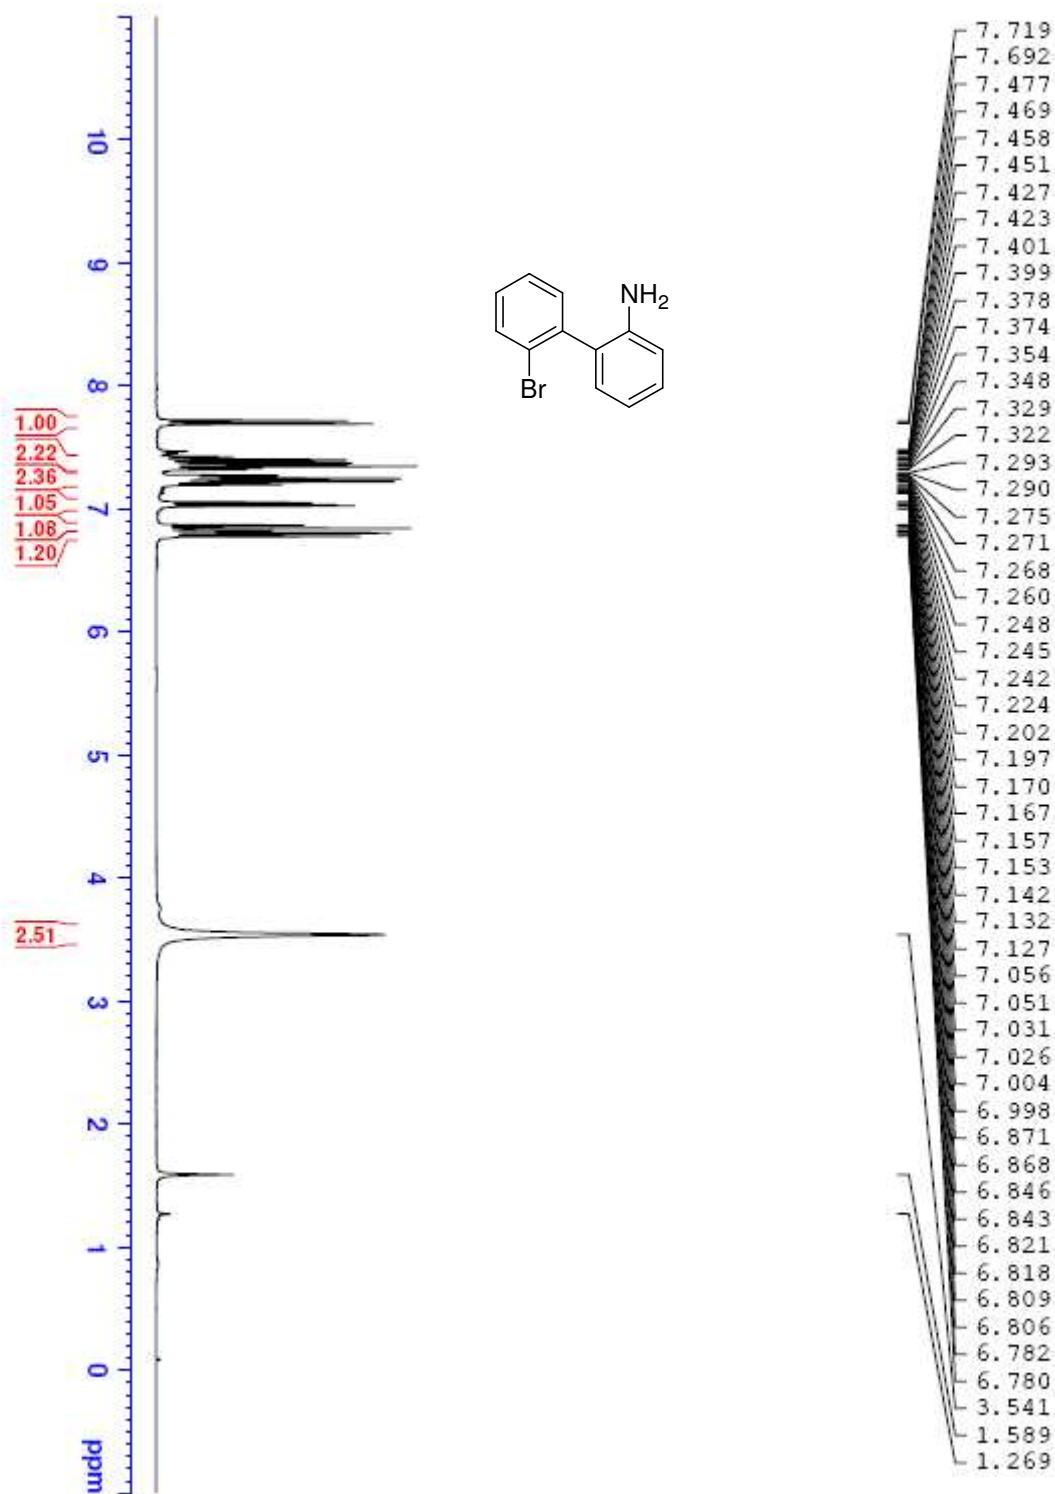

**[1,1'-Biphenyl]-2-amine, 2'-bromo- (2).**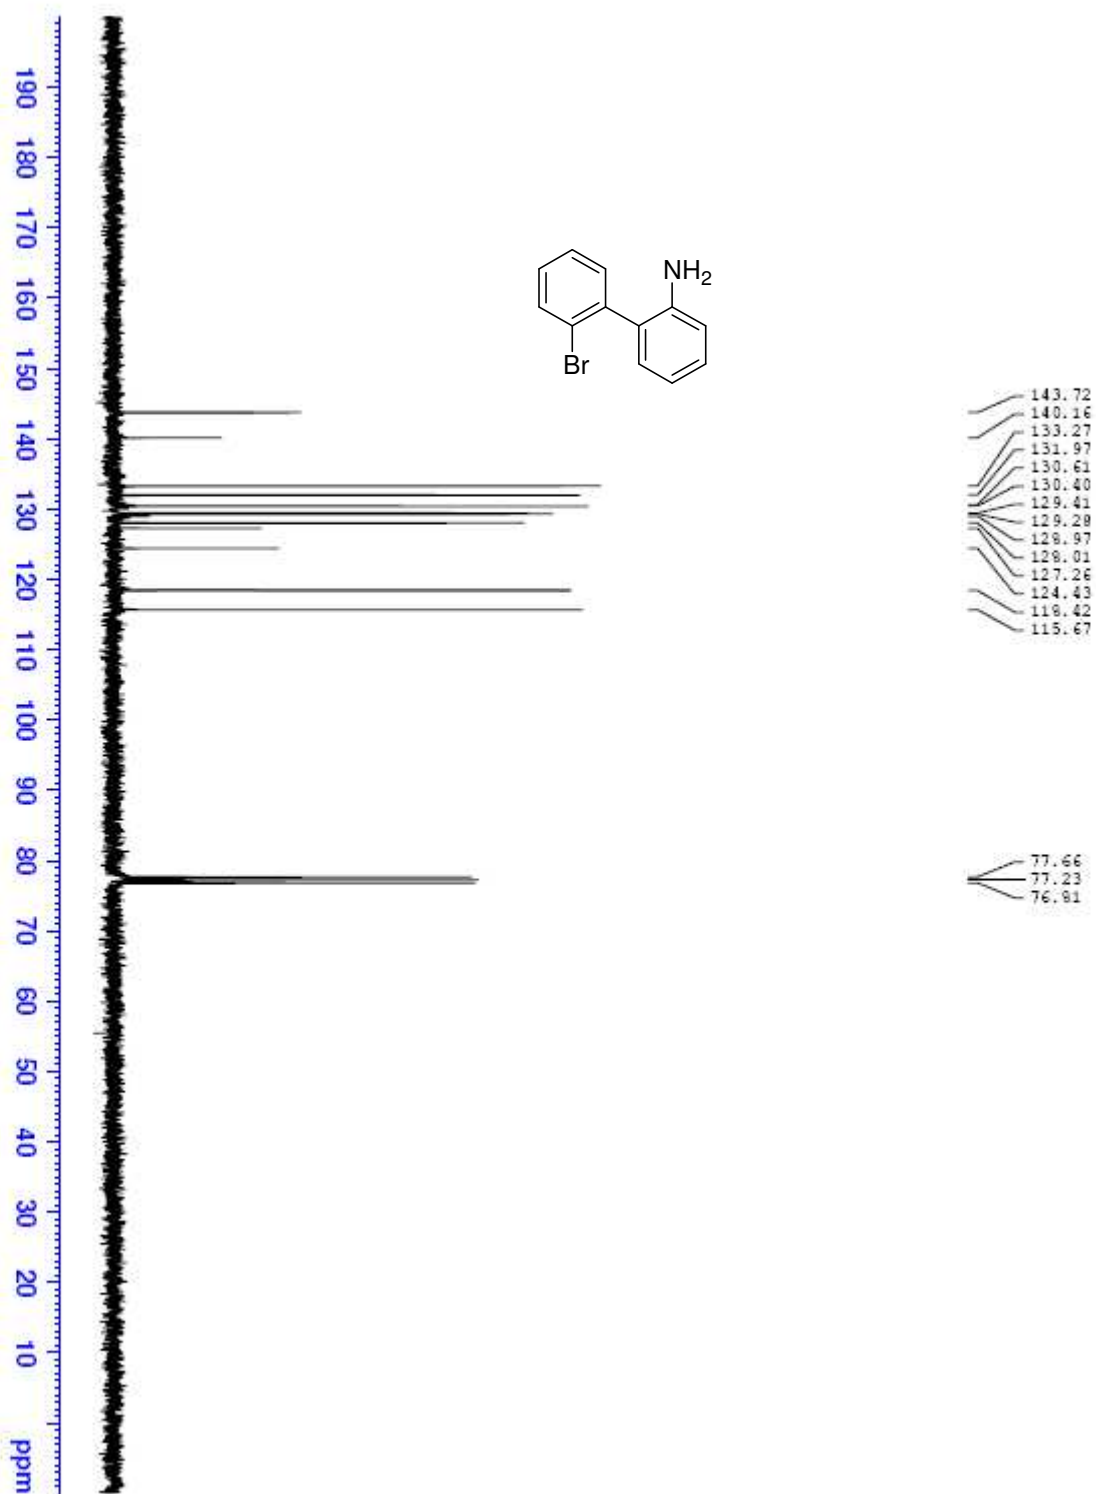

**[1,1'-Biphenyl]-2-acetamide, 2'-bromo- (3).**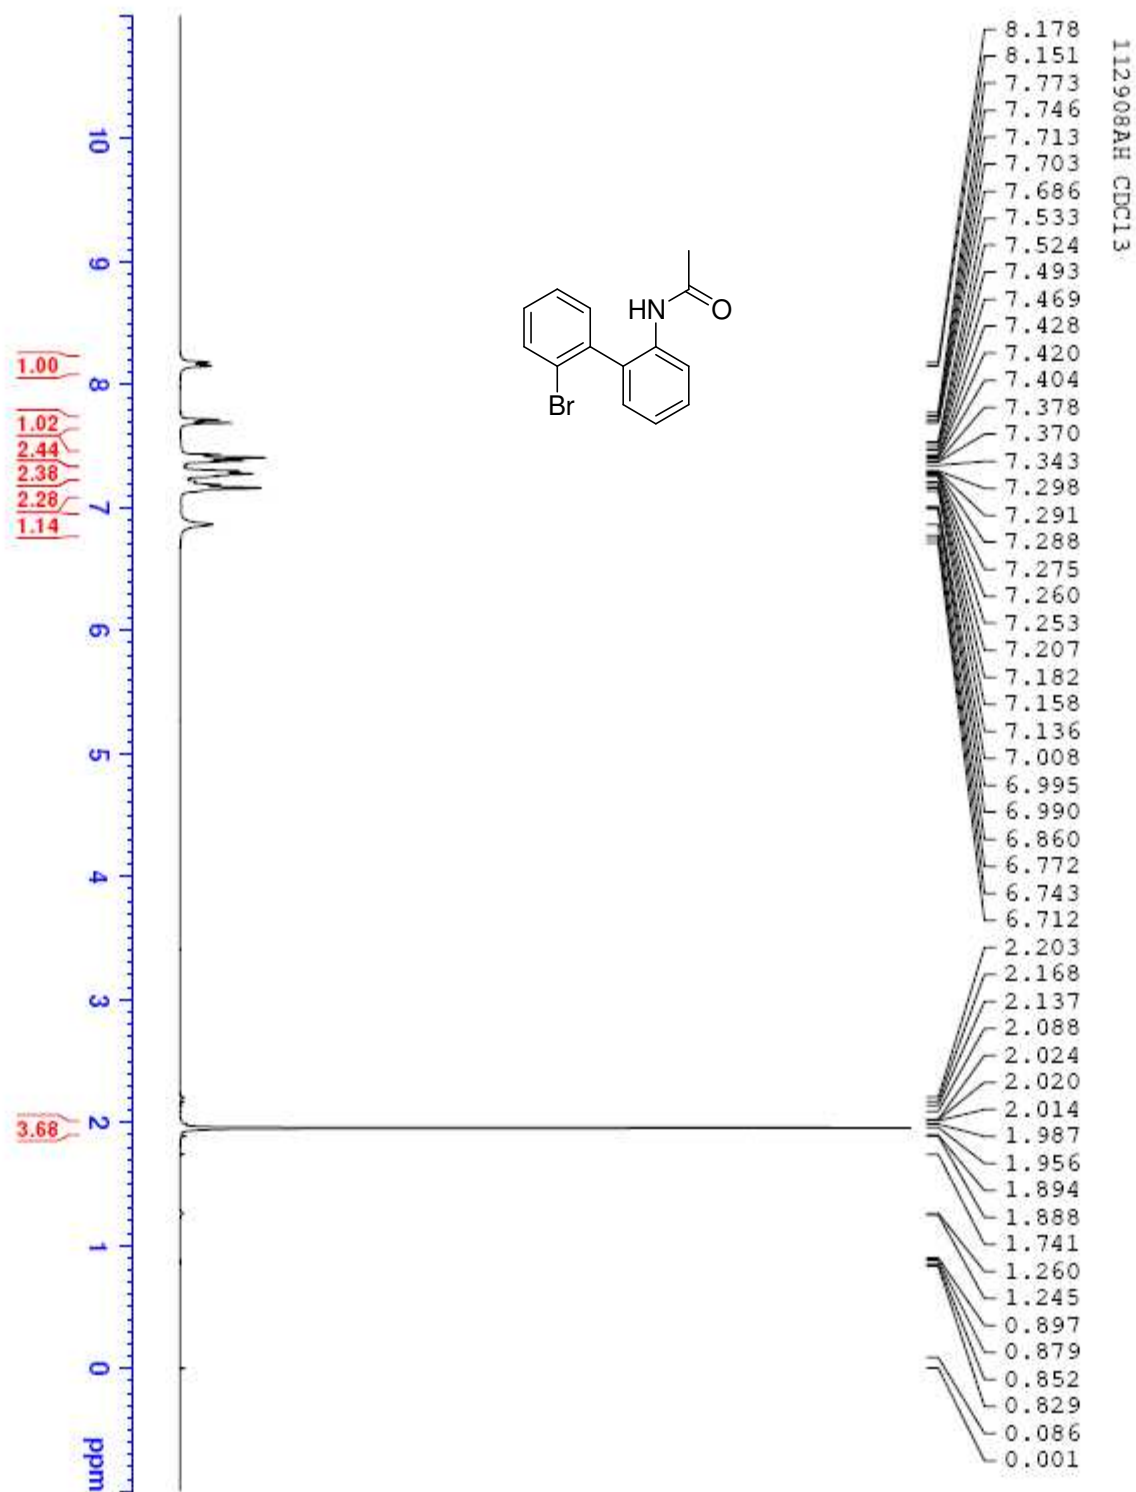

**[1,1'-Biphenyl]-2-acetamide, 2'-bromo- (3).**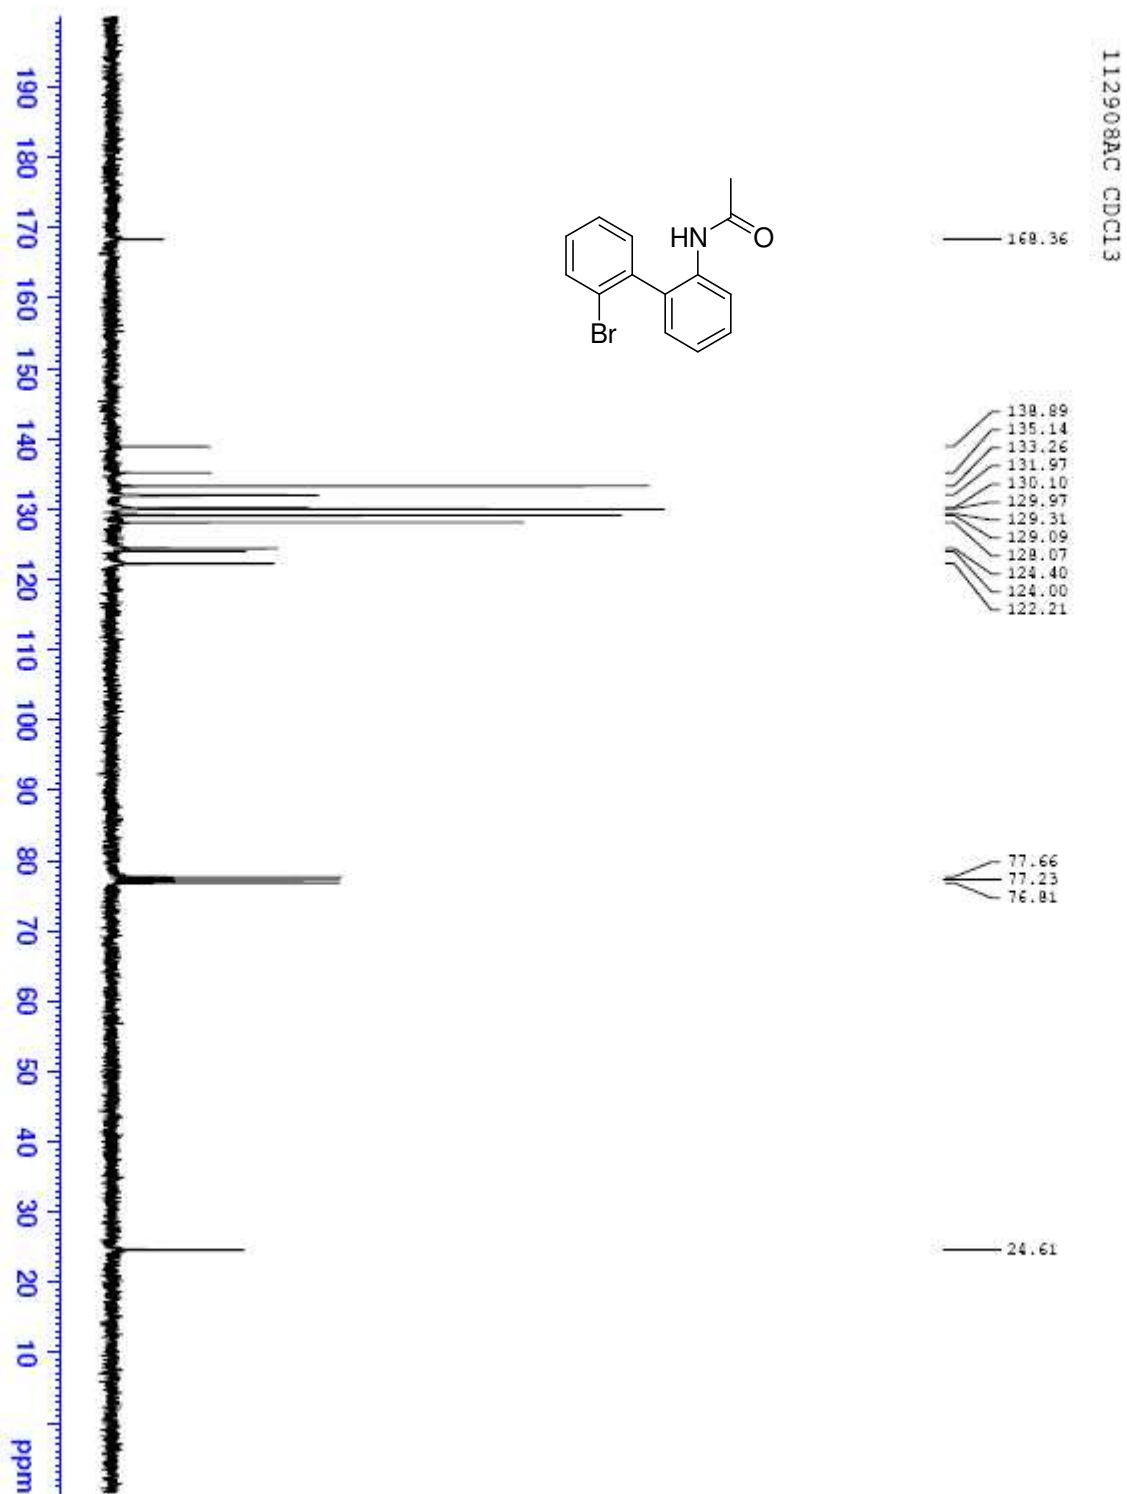

**[1,1'-Biphenyl]-2-phenylacetamide, 2'-bromo- (4).**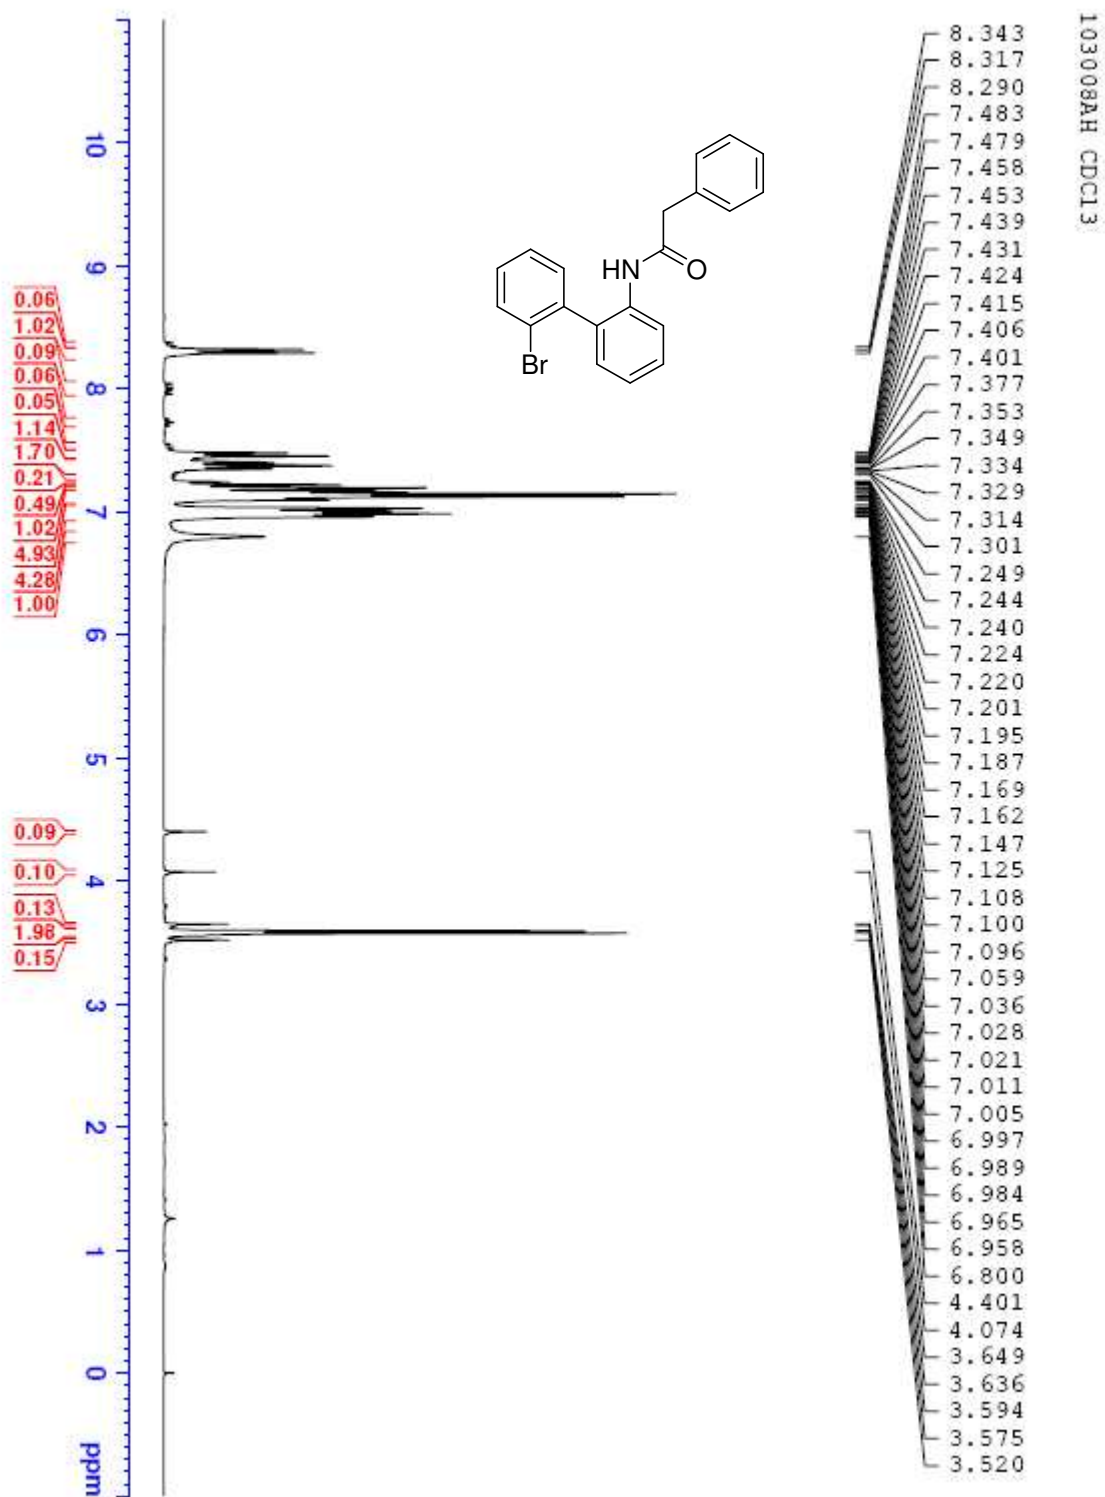



**[1,1'-Biphenyl]-2-phenylacetamide, 2'-bromo- (4).**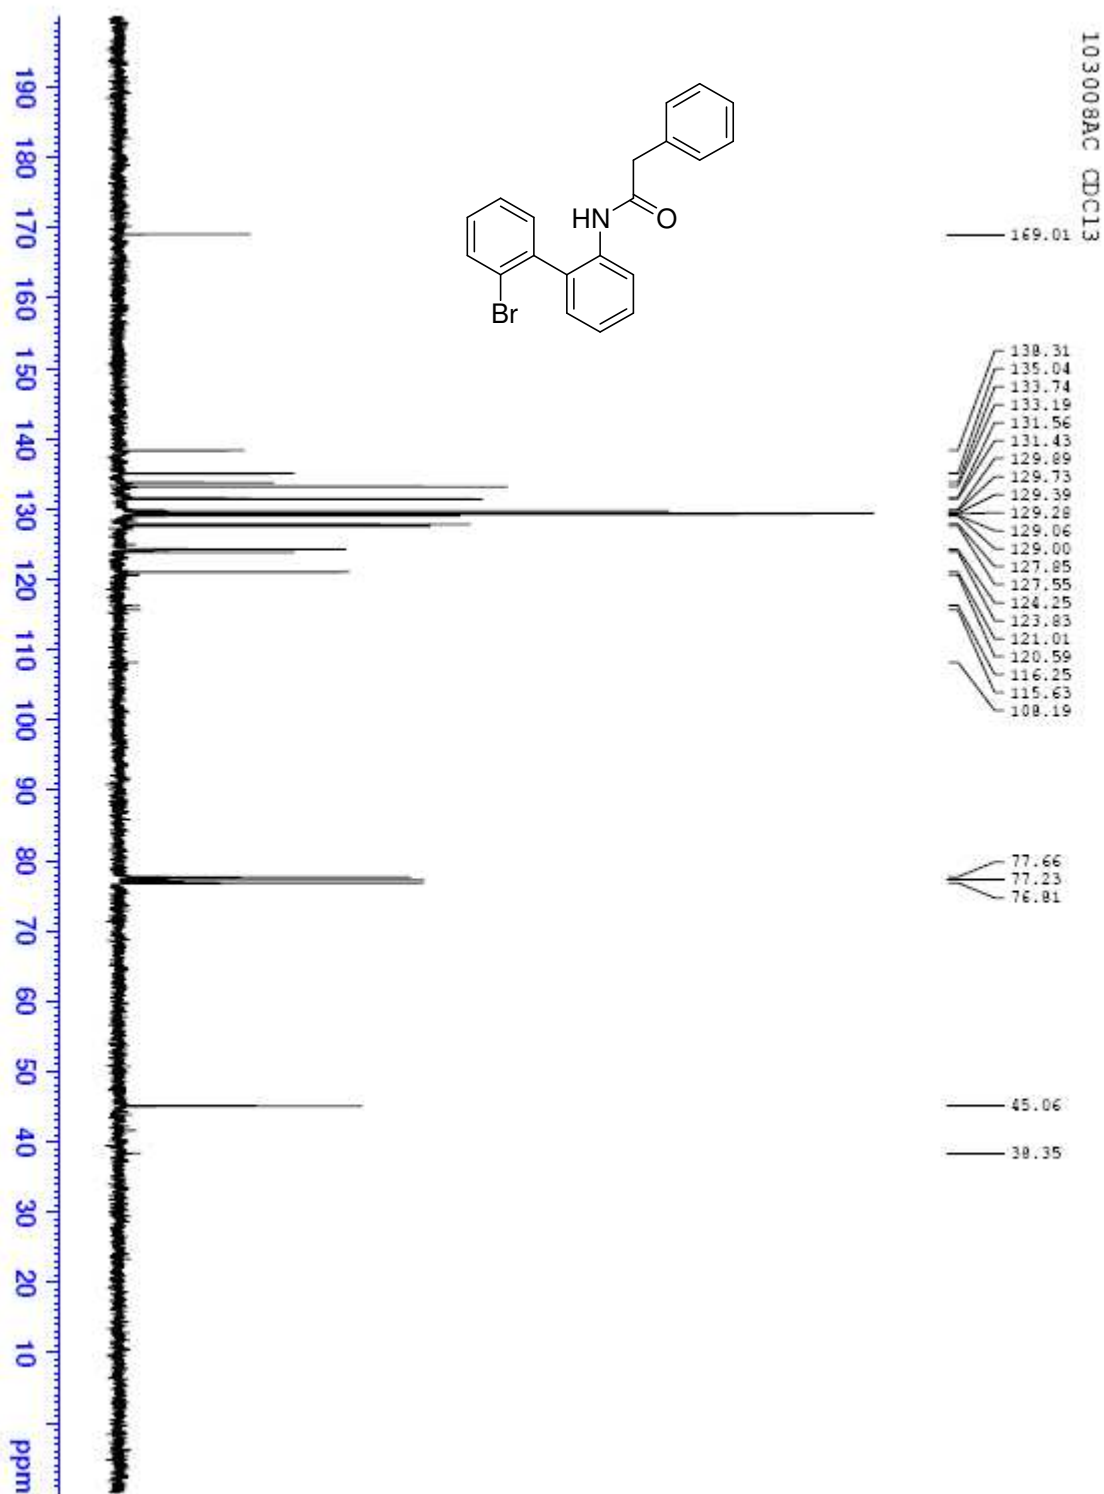

**[1,1'-Biphenyl]-2-propionamide, 2'-bromo- (5).**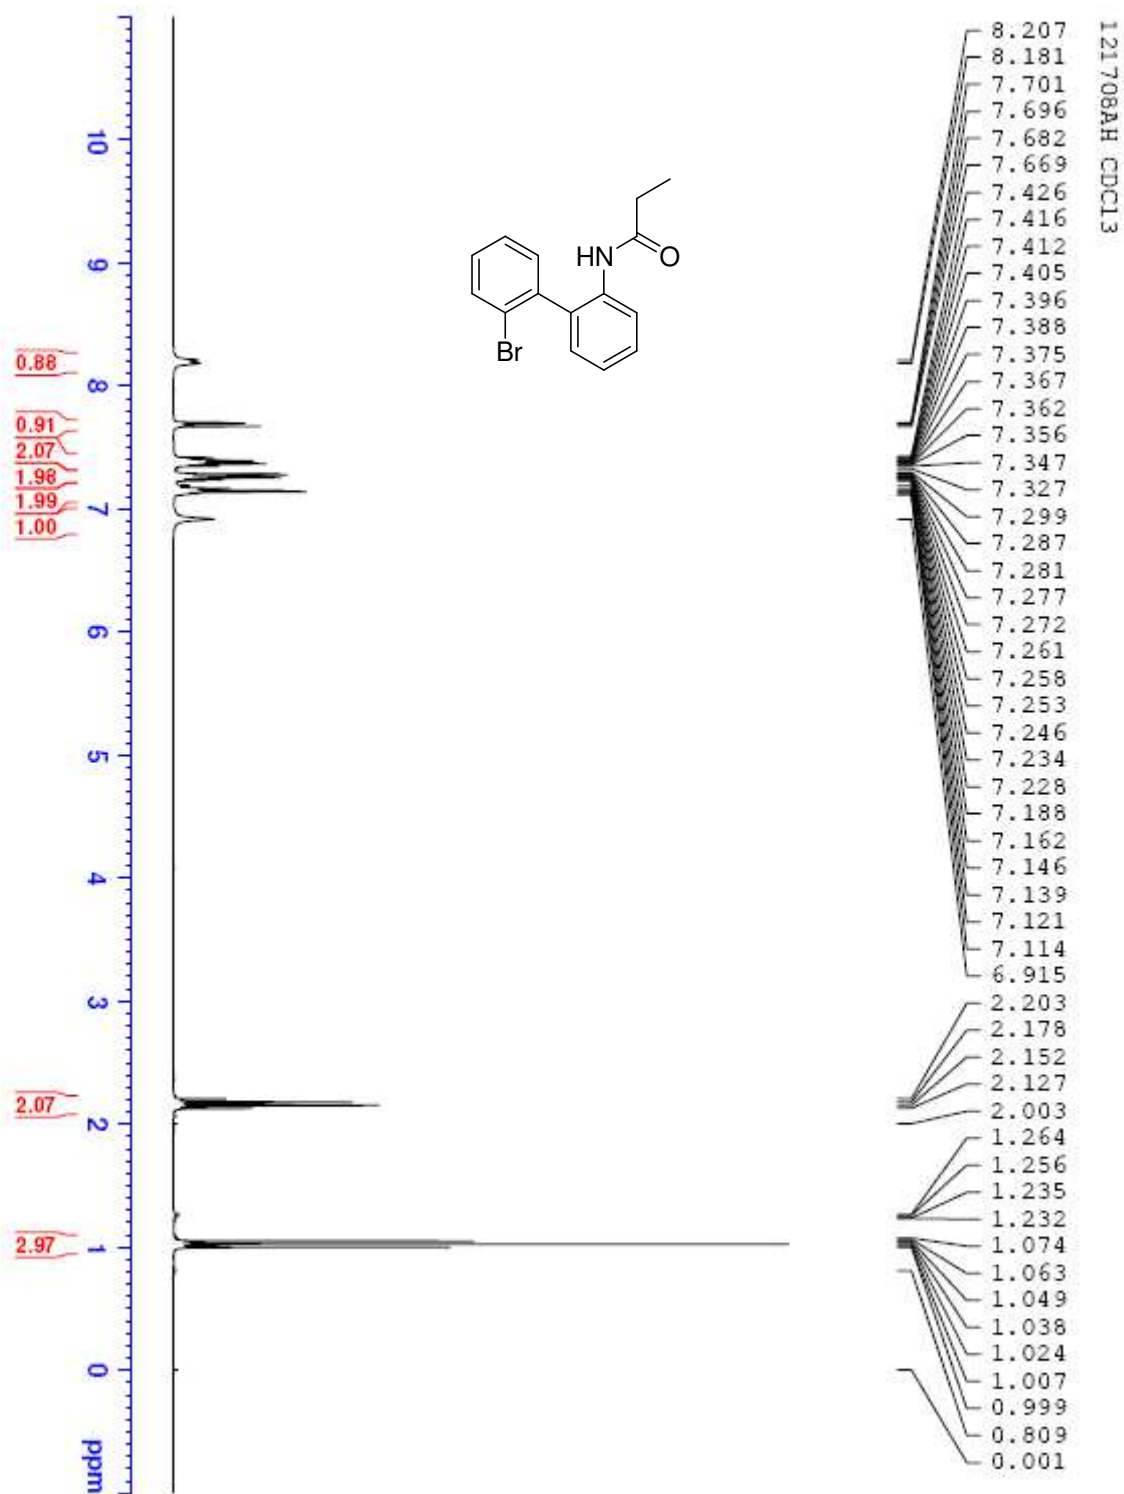

**[1,1'-Biphenyl]-2-propionamide, 2'-bromo- (5).**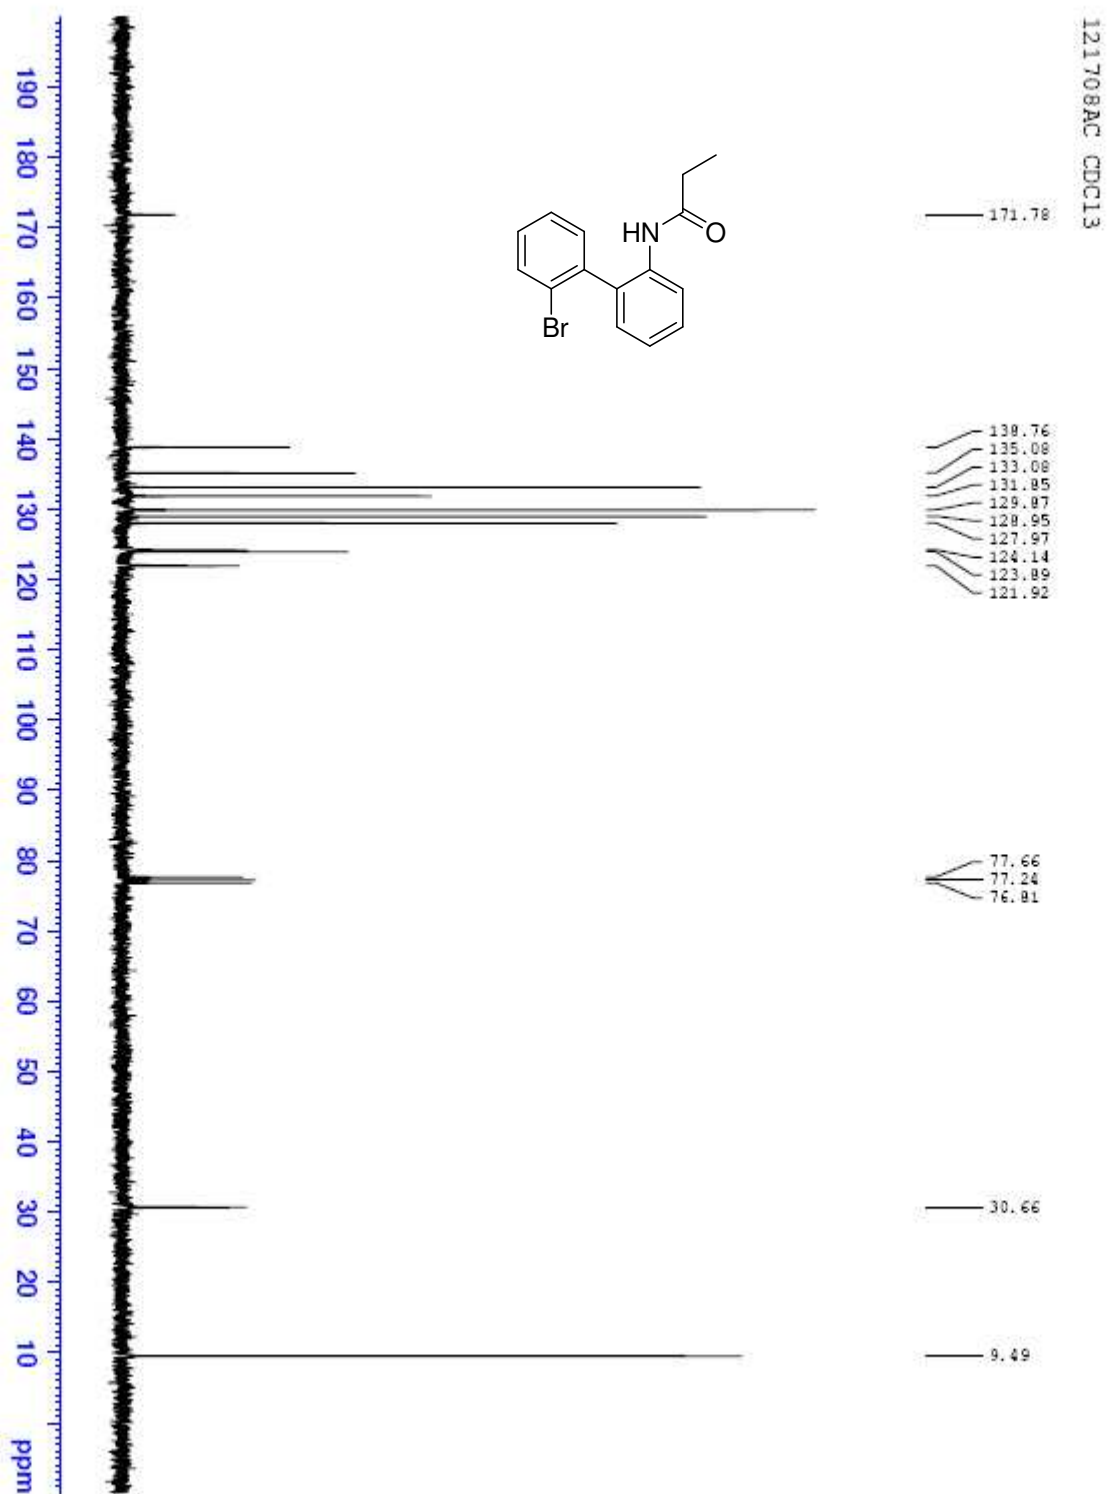

**[1,1'-Biphenyl]-2-methoxyacetamide, 2'-bromo- (6).**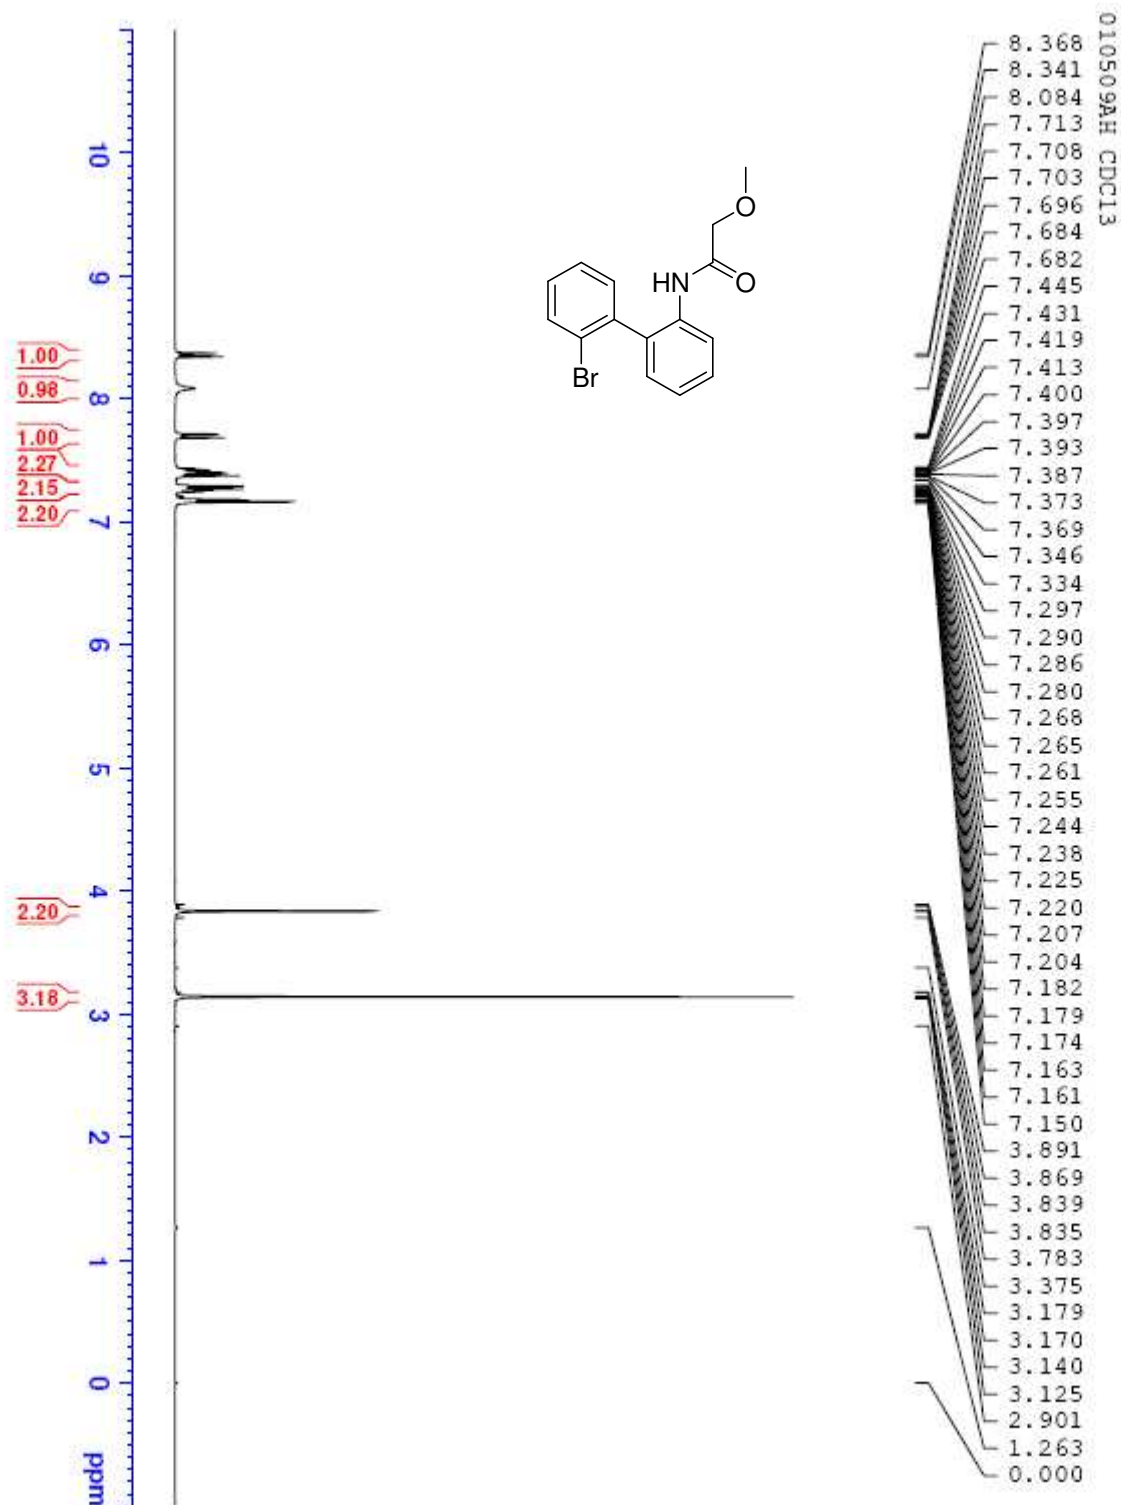

**[1,1'-Biphenyl]-2-methoxyacetamide, 2'-bromo- (6).**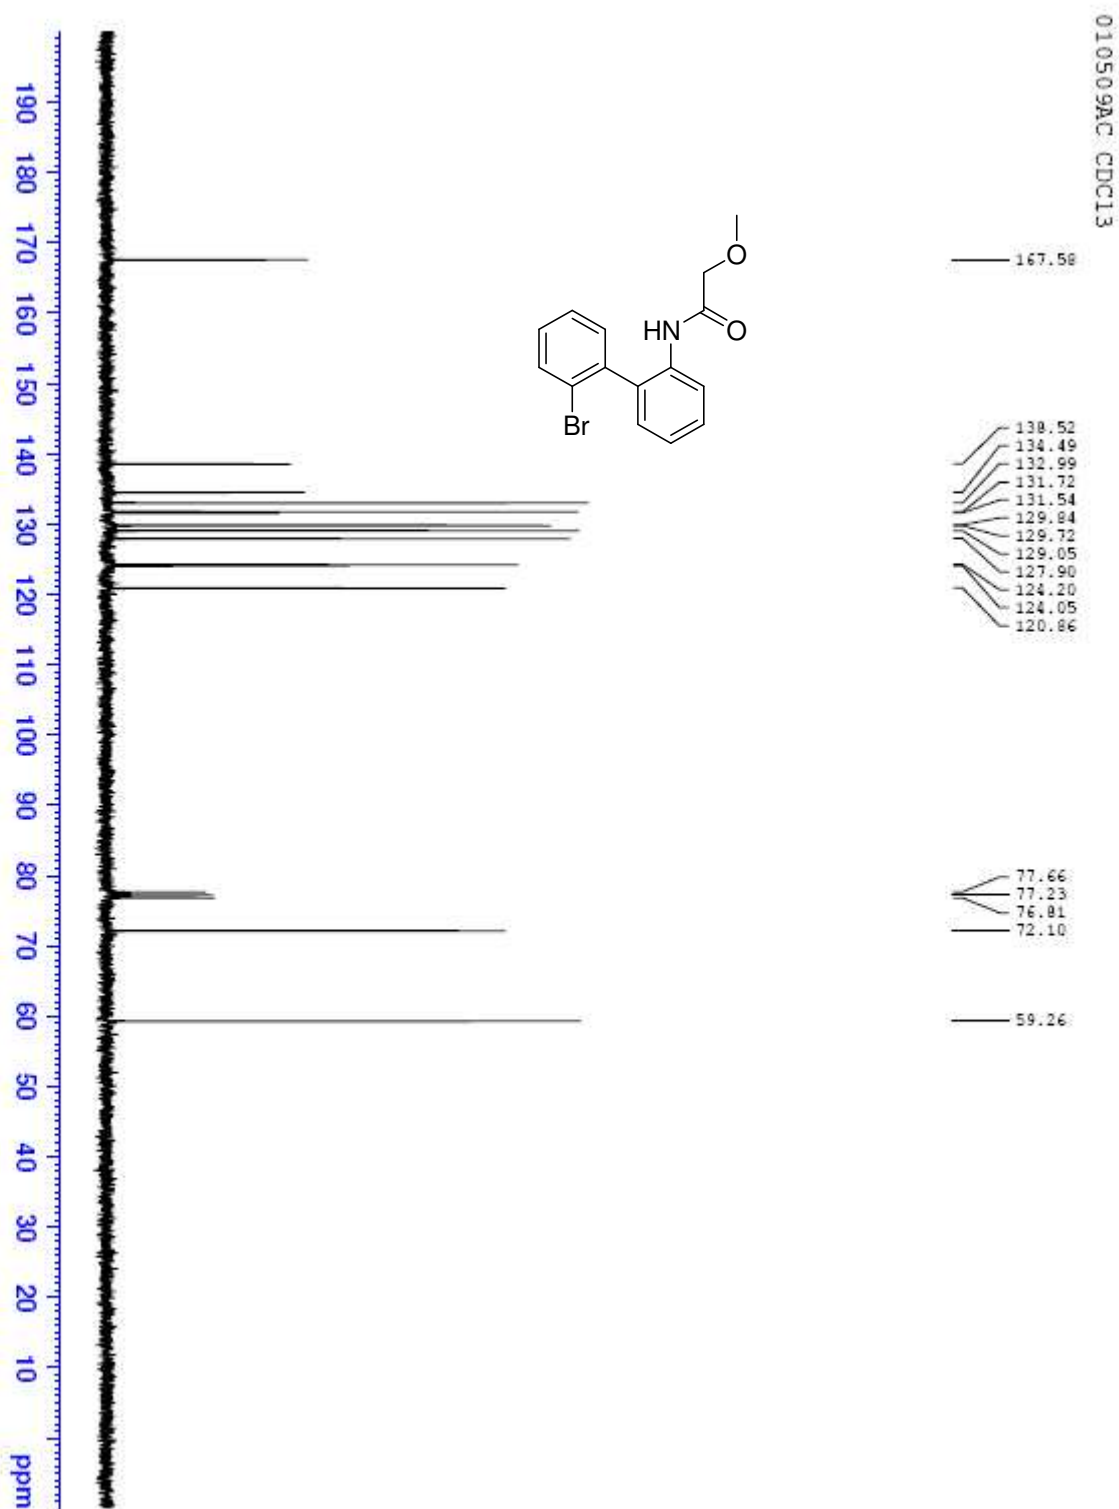

**[1,1'-Biphenyl]-2-isobutyramide, 2'-bromo- (7).**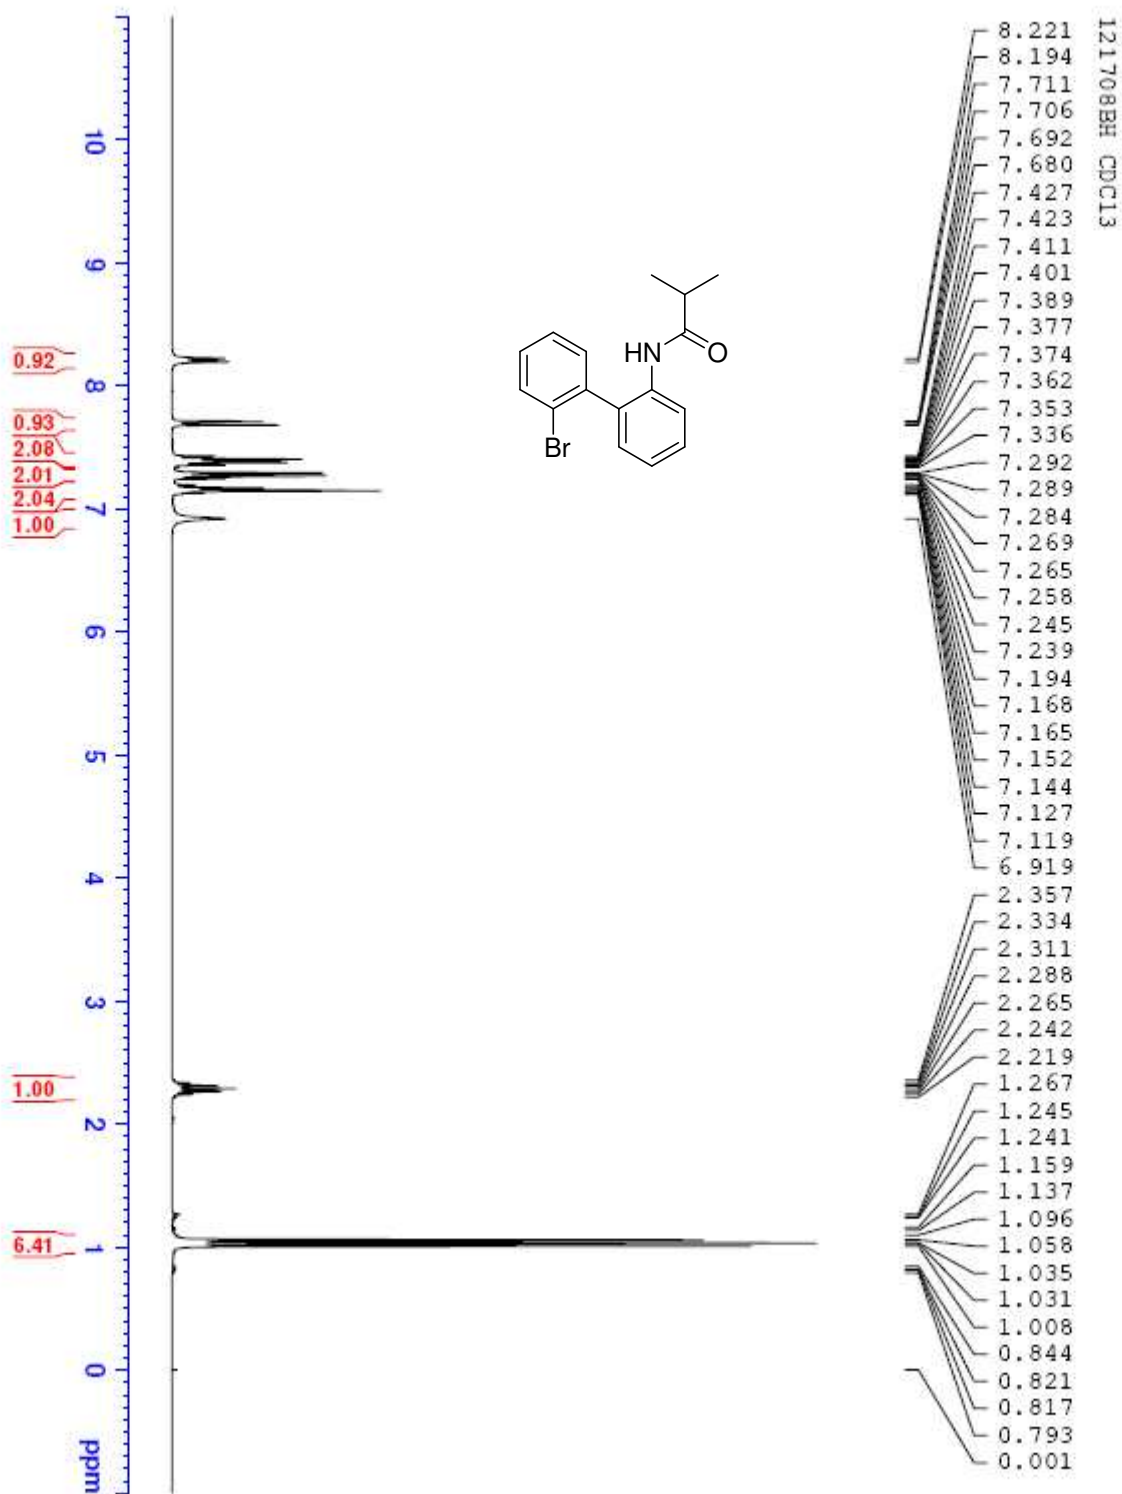

**[1,1'-Biphenyl]-2-isobutyramide, 2'-bromo- (7).**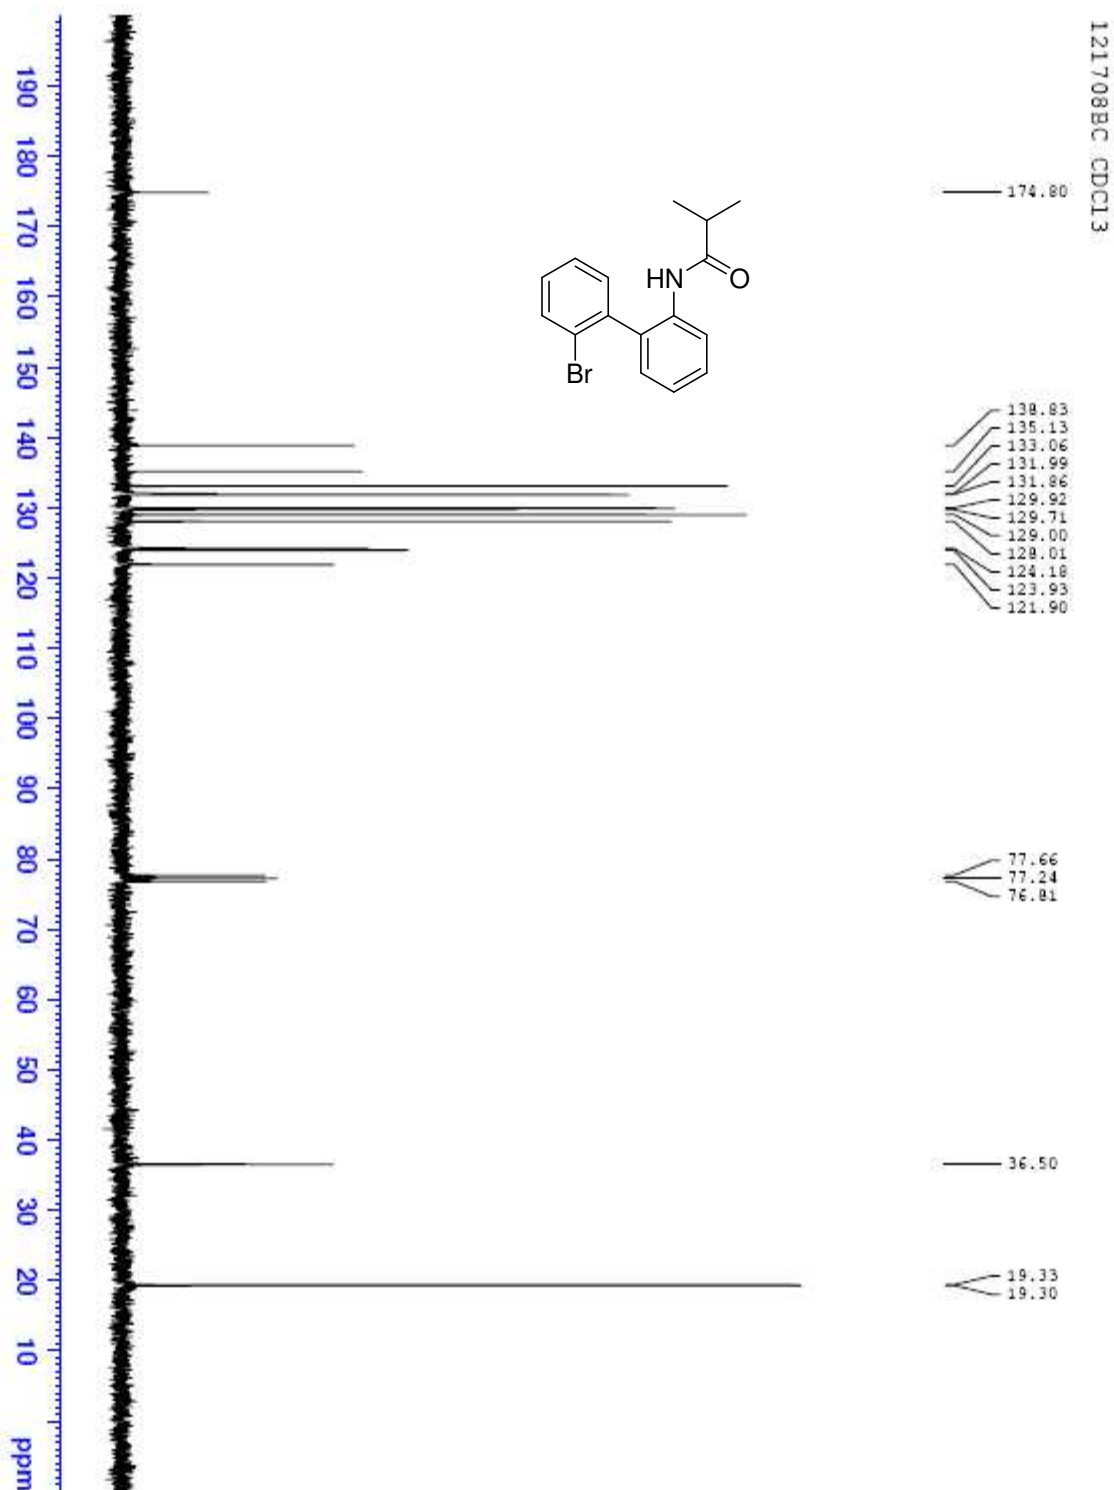

**[1,1'-Biphenyl]-2-benzyloxyacetamide, 2'-bromo- (8).**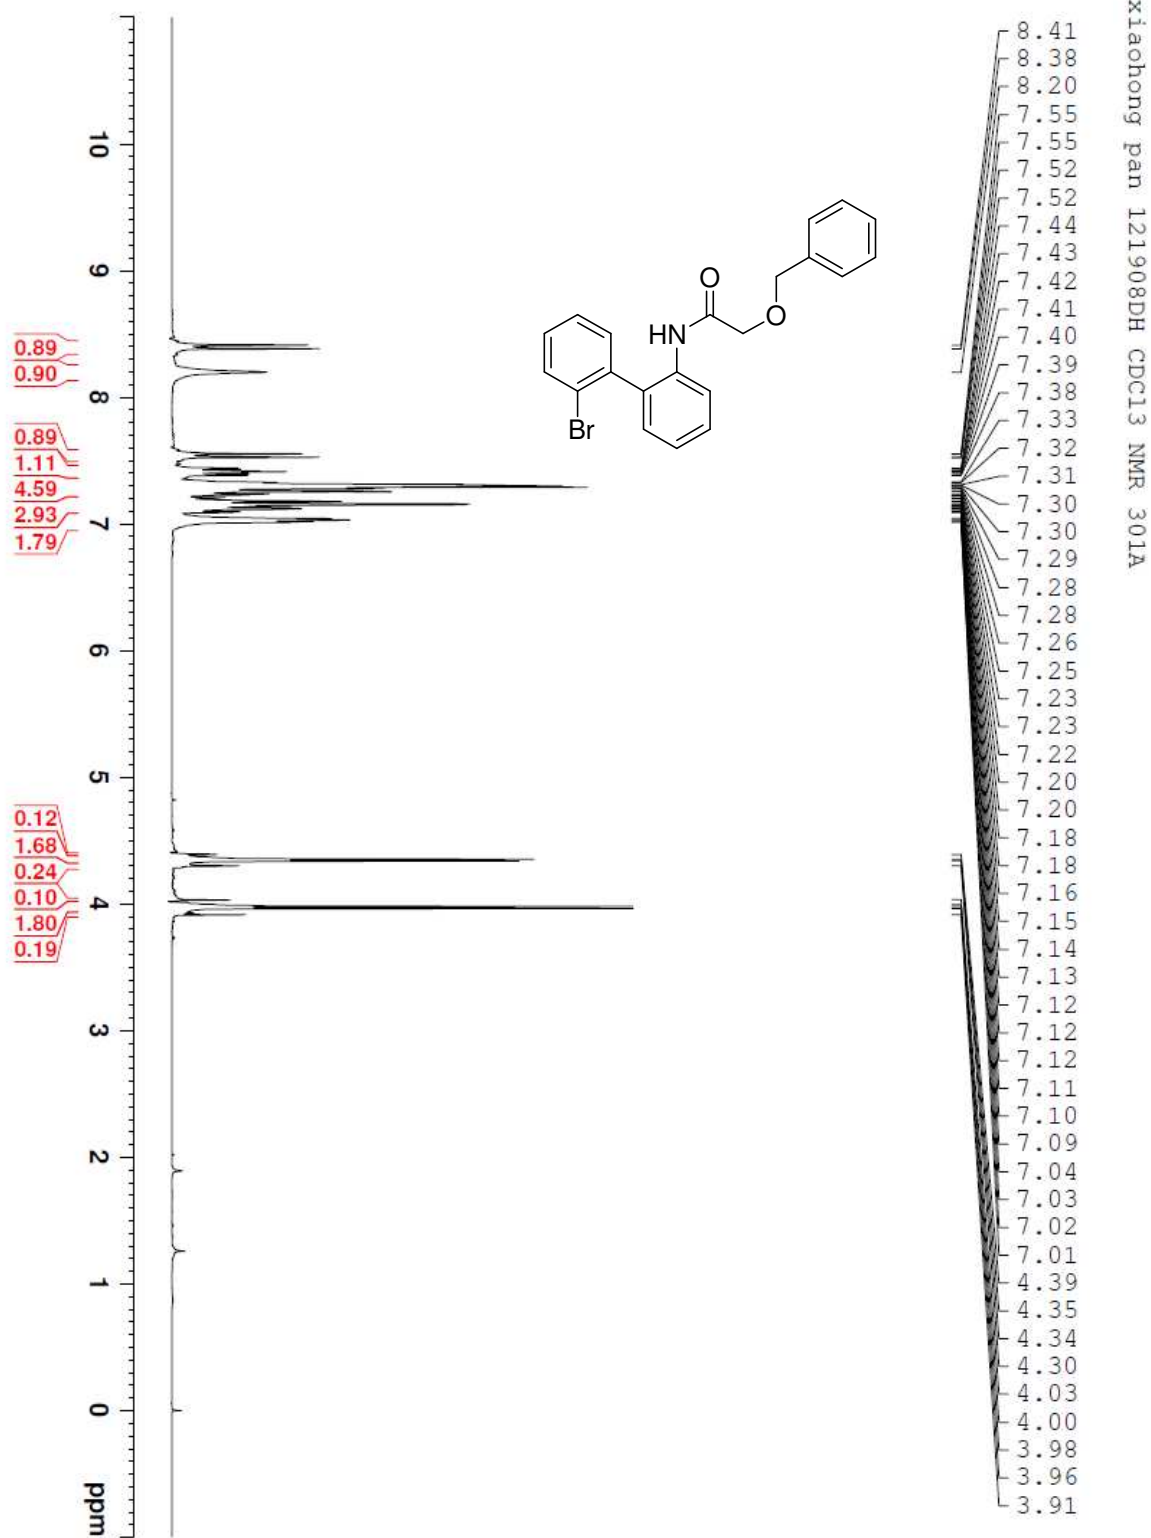



**[1,1'-Biphenyl]-2-benzyloxyacetamide, 2'-bromo- (8).**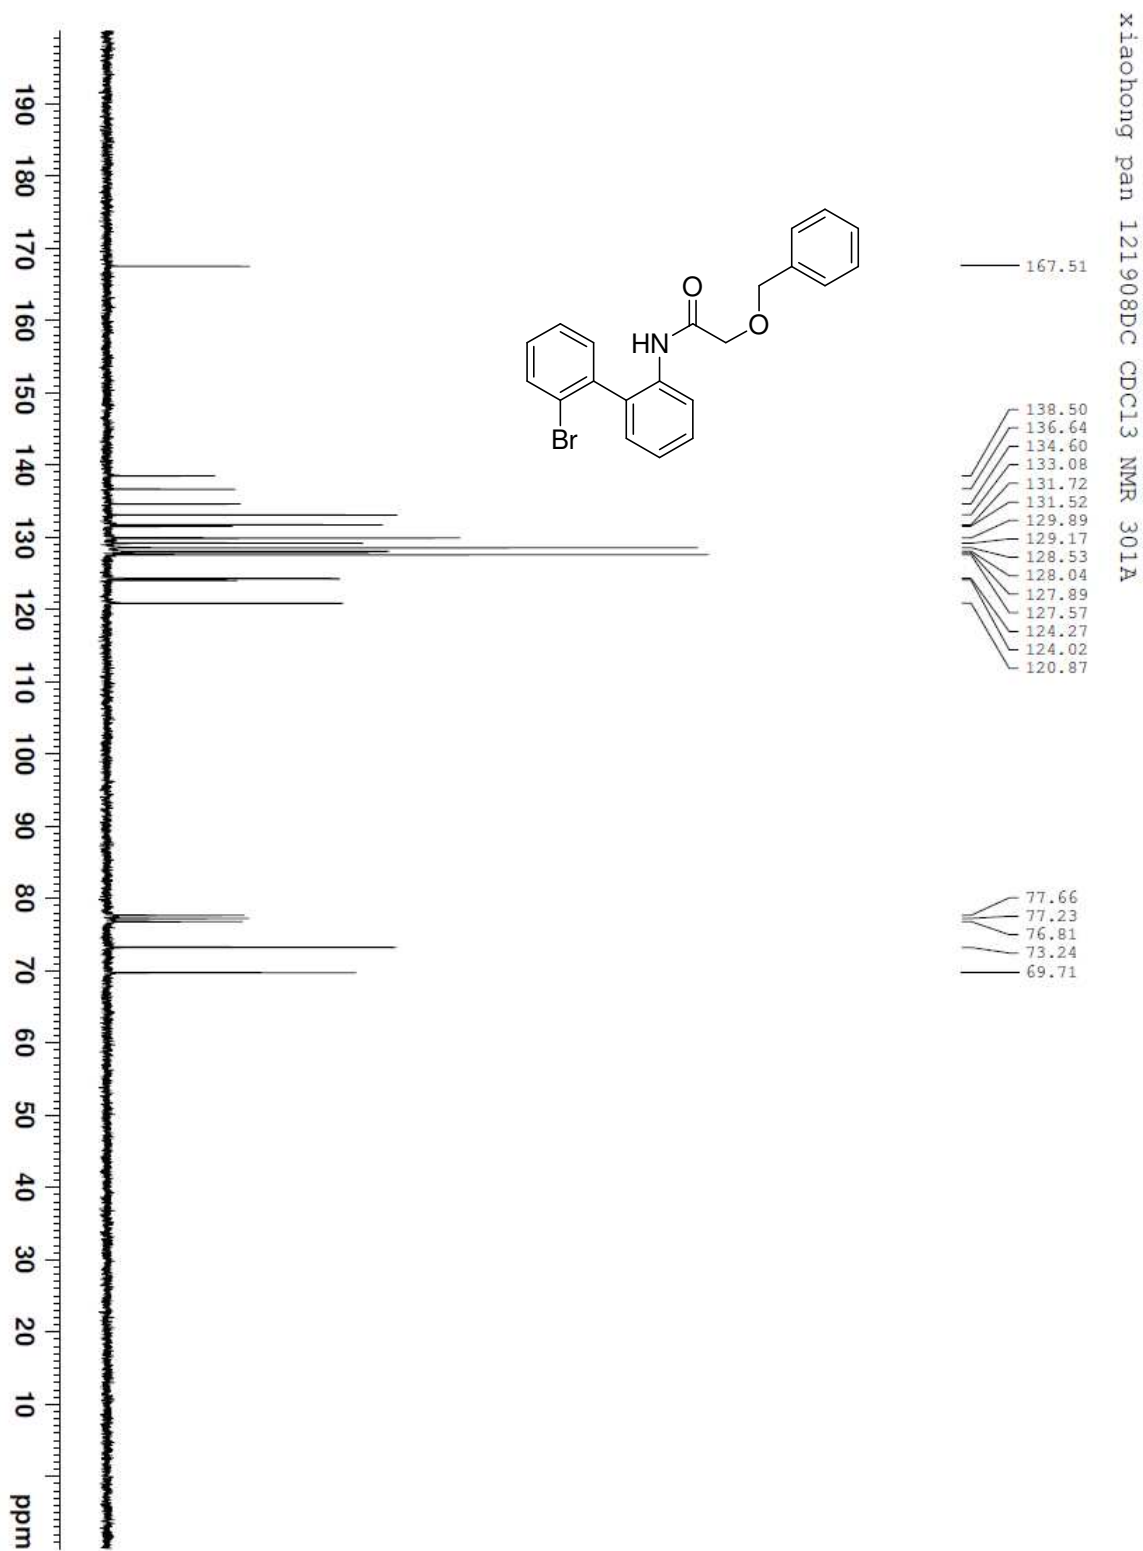

**[1,1'-Biphenyl]-2-dibenzylaminoacetamide, 2'-bromo- (9).**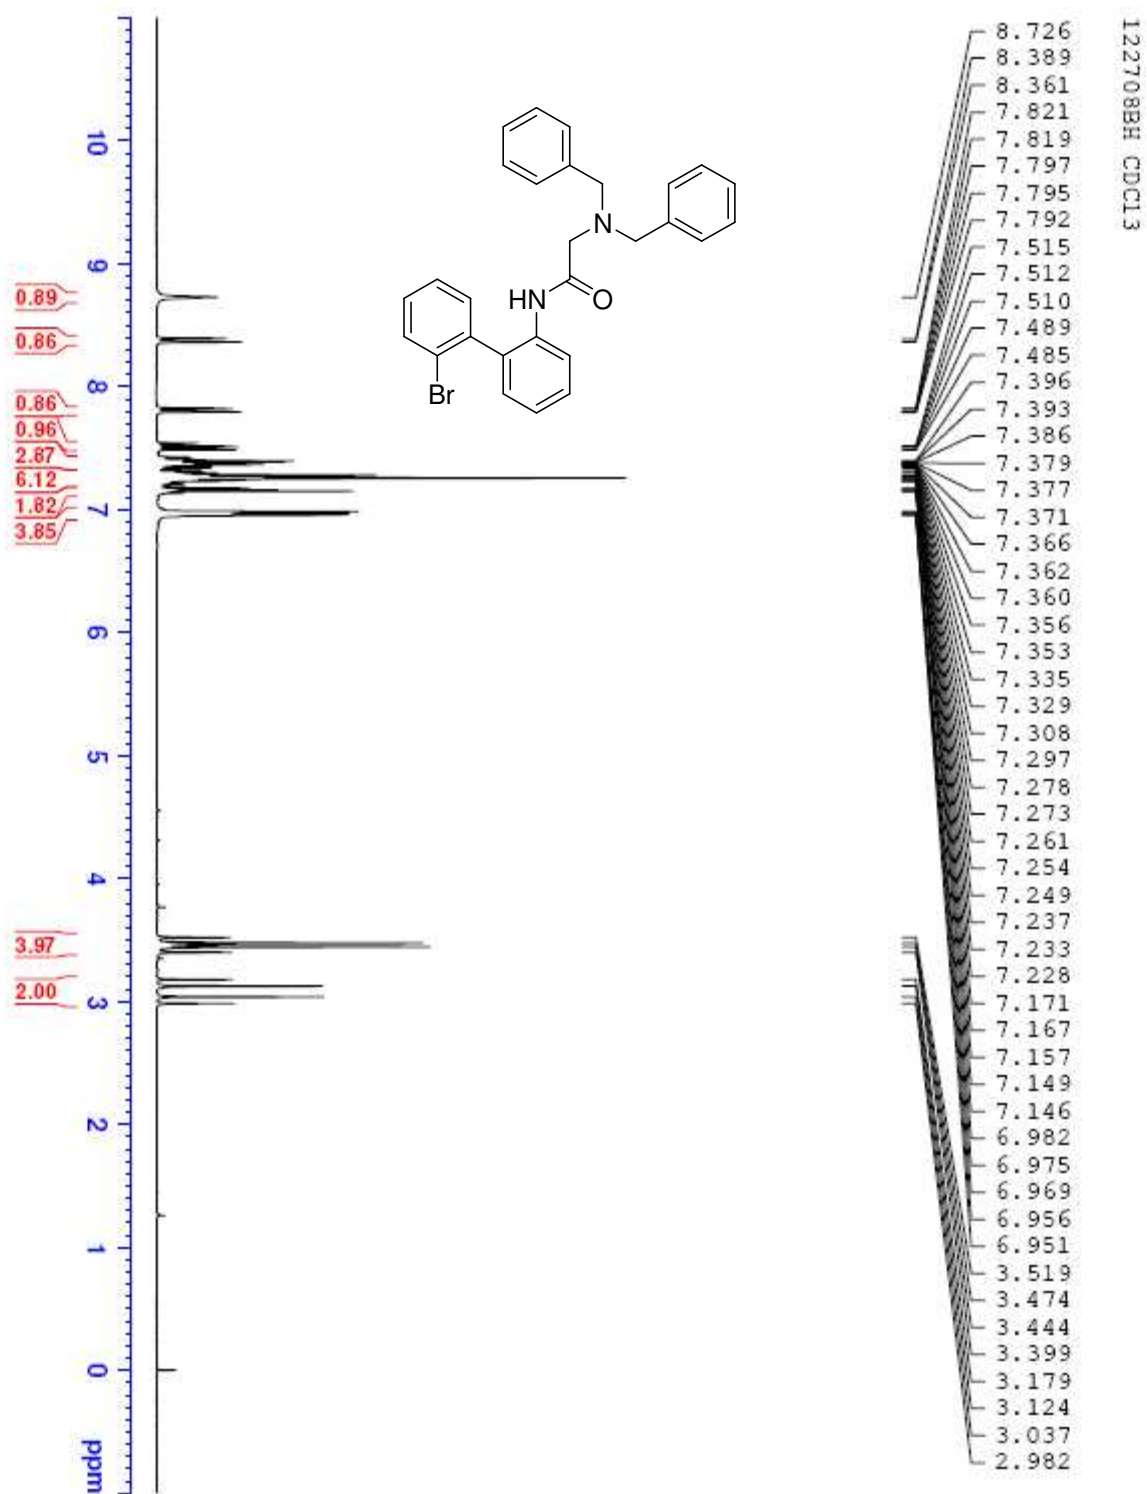

**[1,1'-Biphenyl]-2-dibenzylaminoacetamide, 2'-bromo- (9).**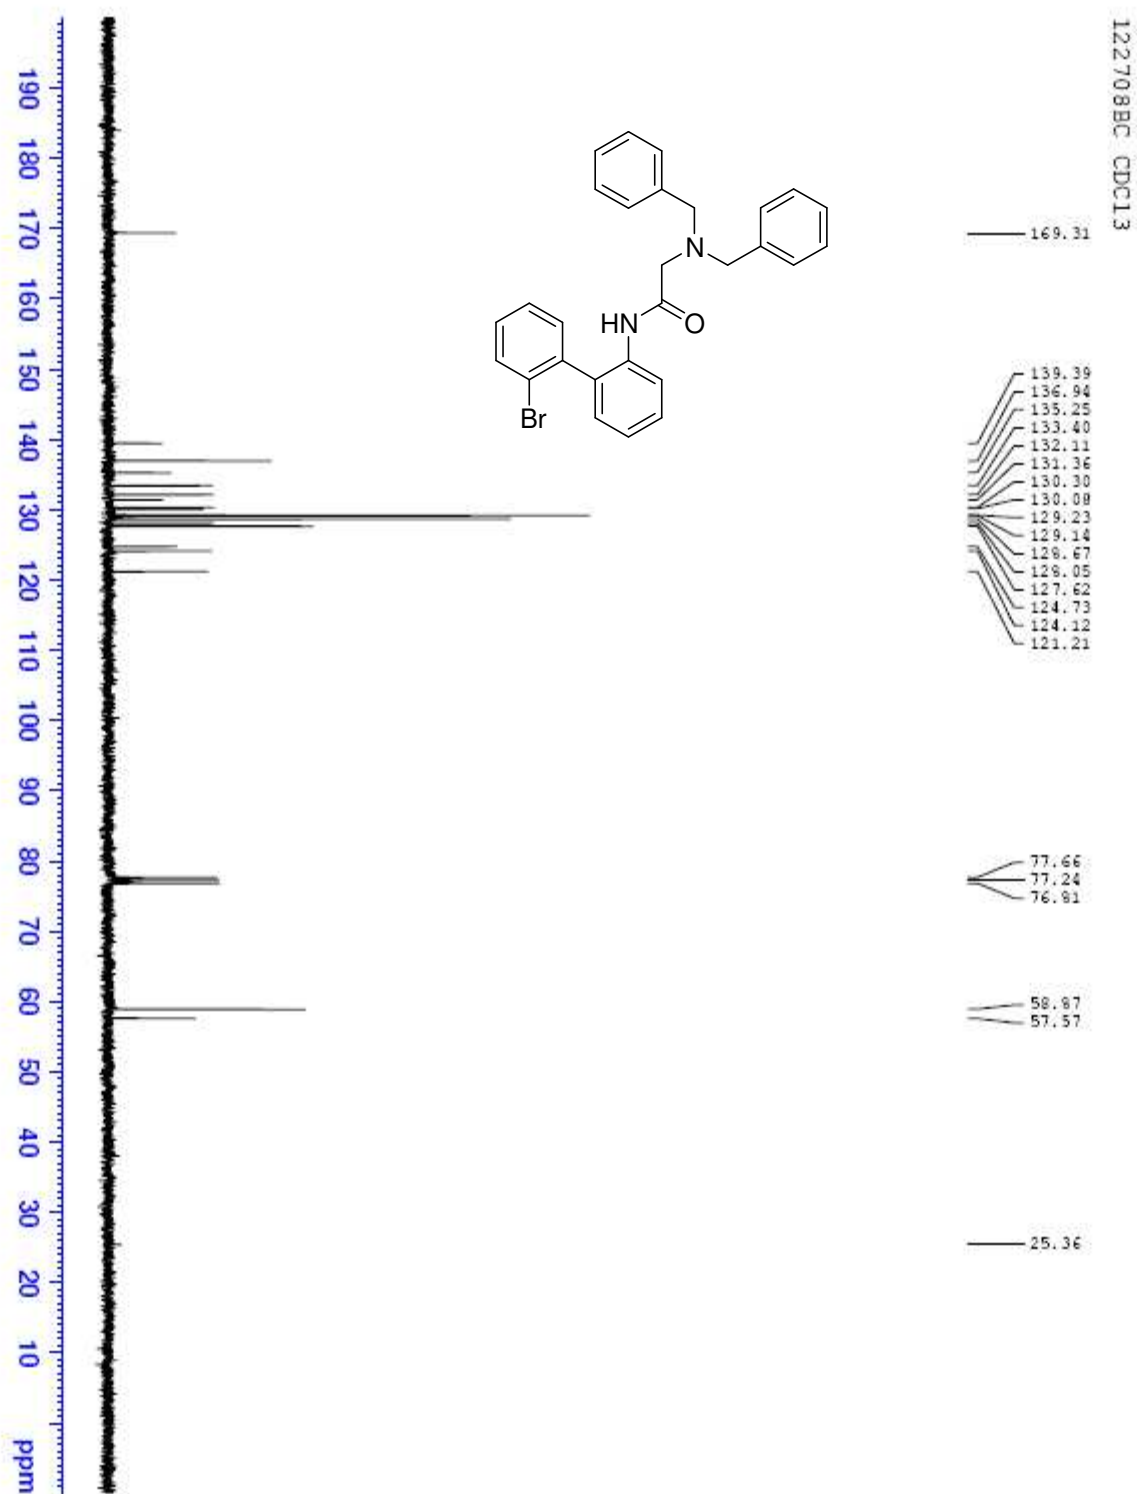

**[1,1'-Biphenyl]-2-(N-methyl-acetamide), 2'-bromo- (10).**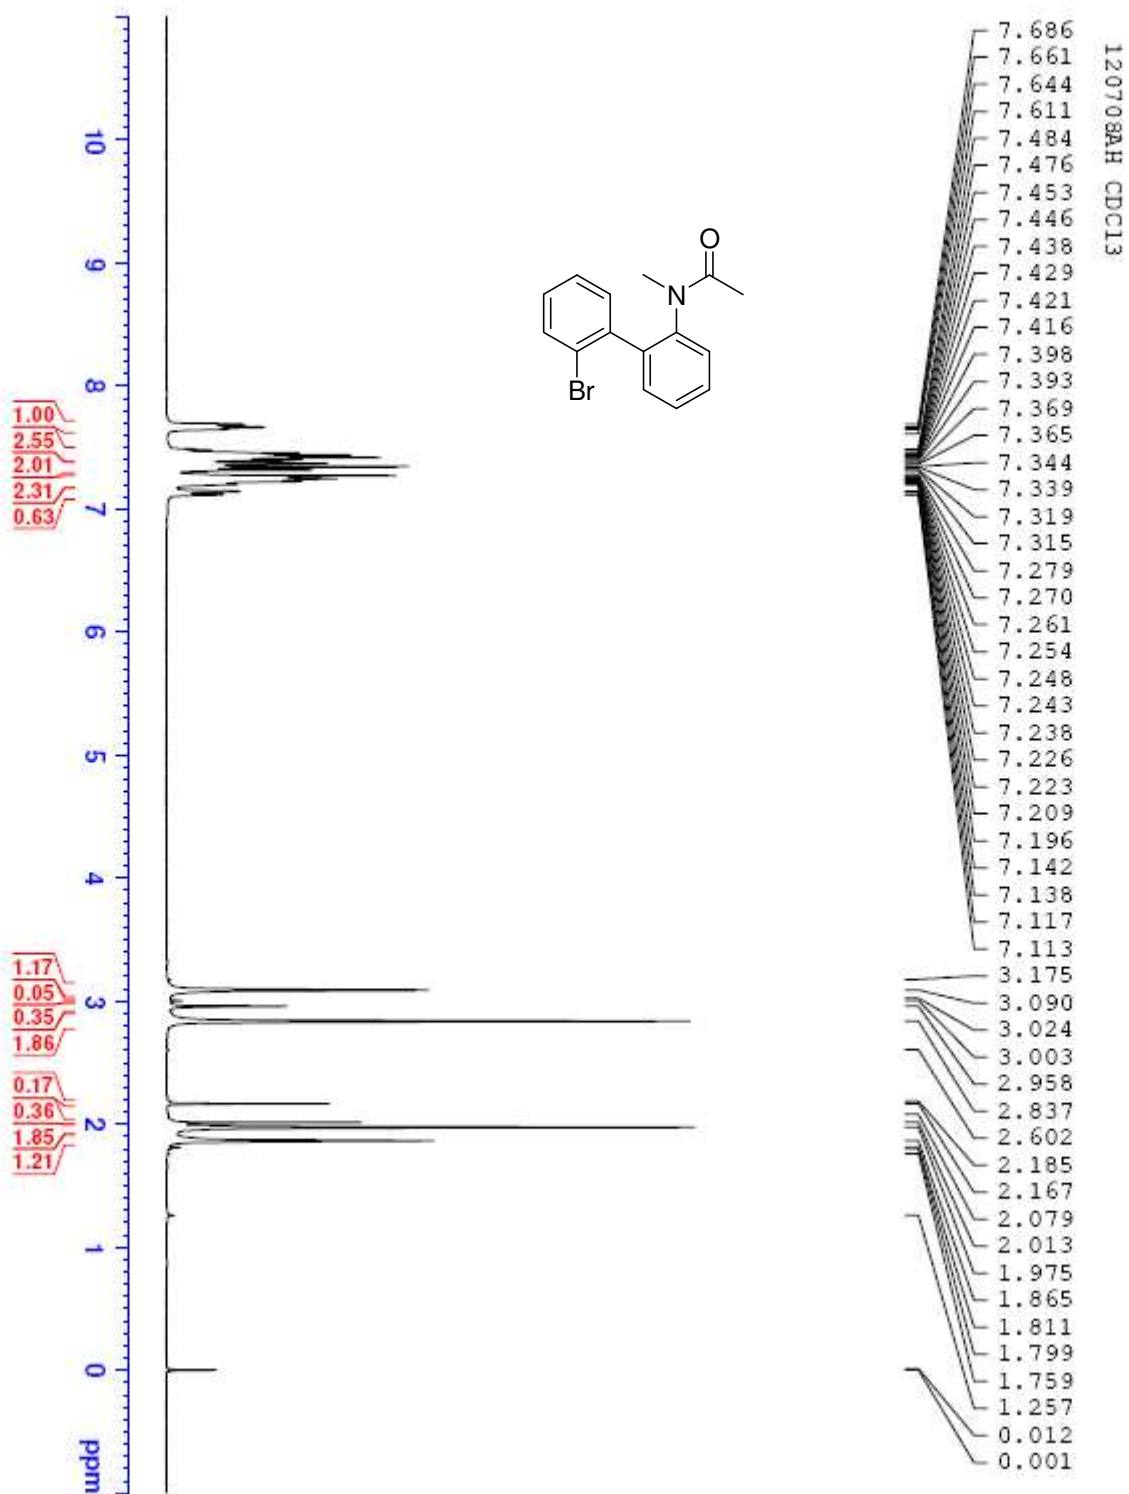

**[1,1'-Biphenyl]-2-(N-methyl-acetamide), 2'-bromo- (10).**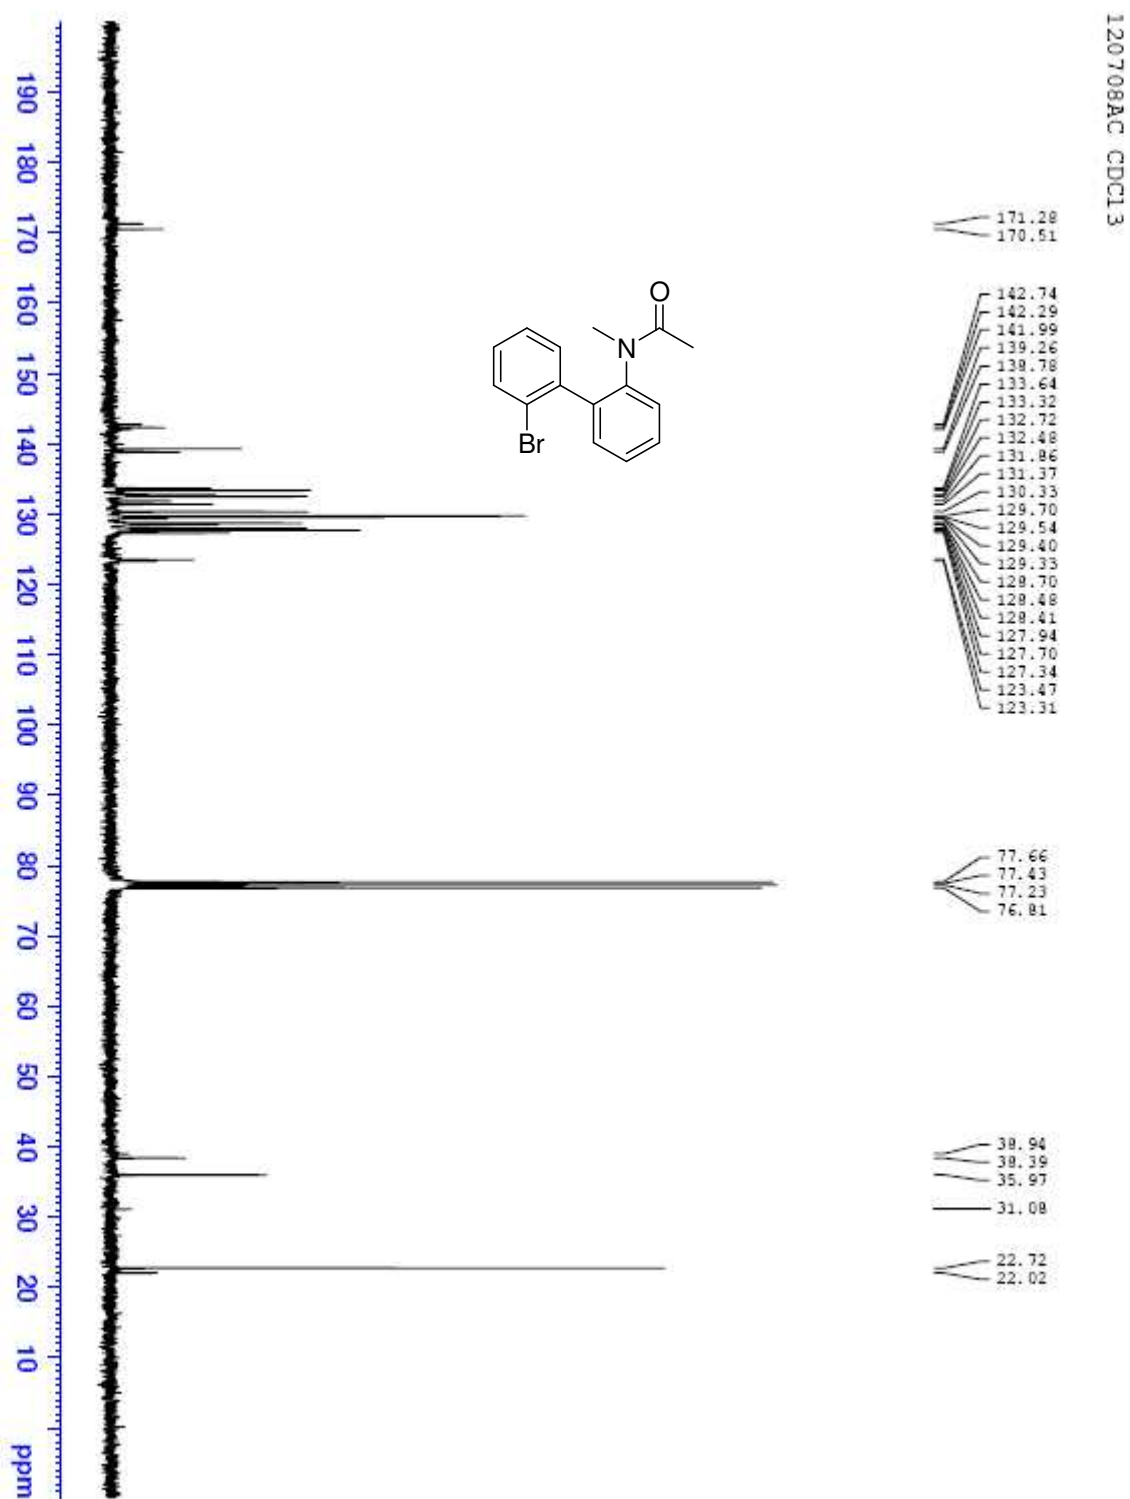

**[1,1'-Biphenyl]-2-(N-methyl-phenylacetamide), 2'-bromo- (11).**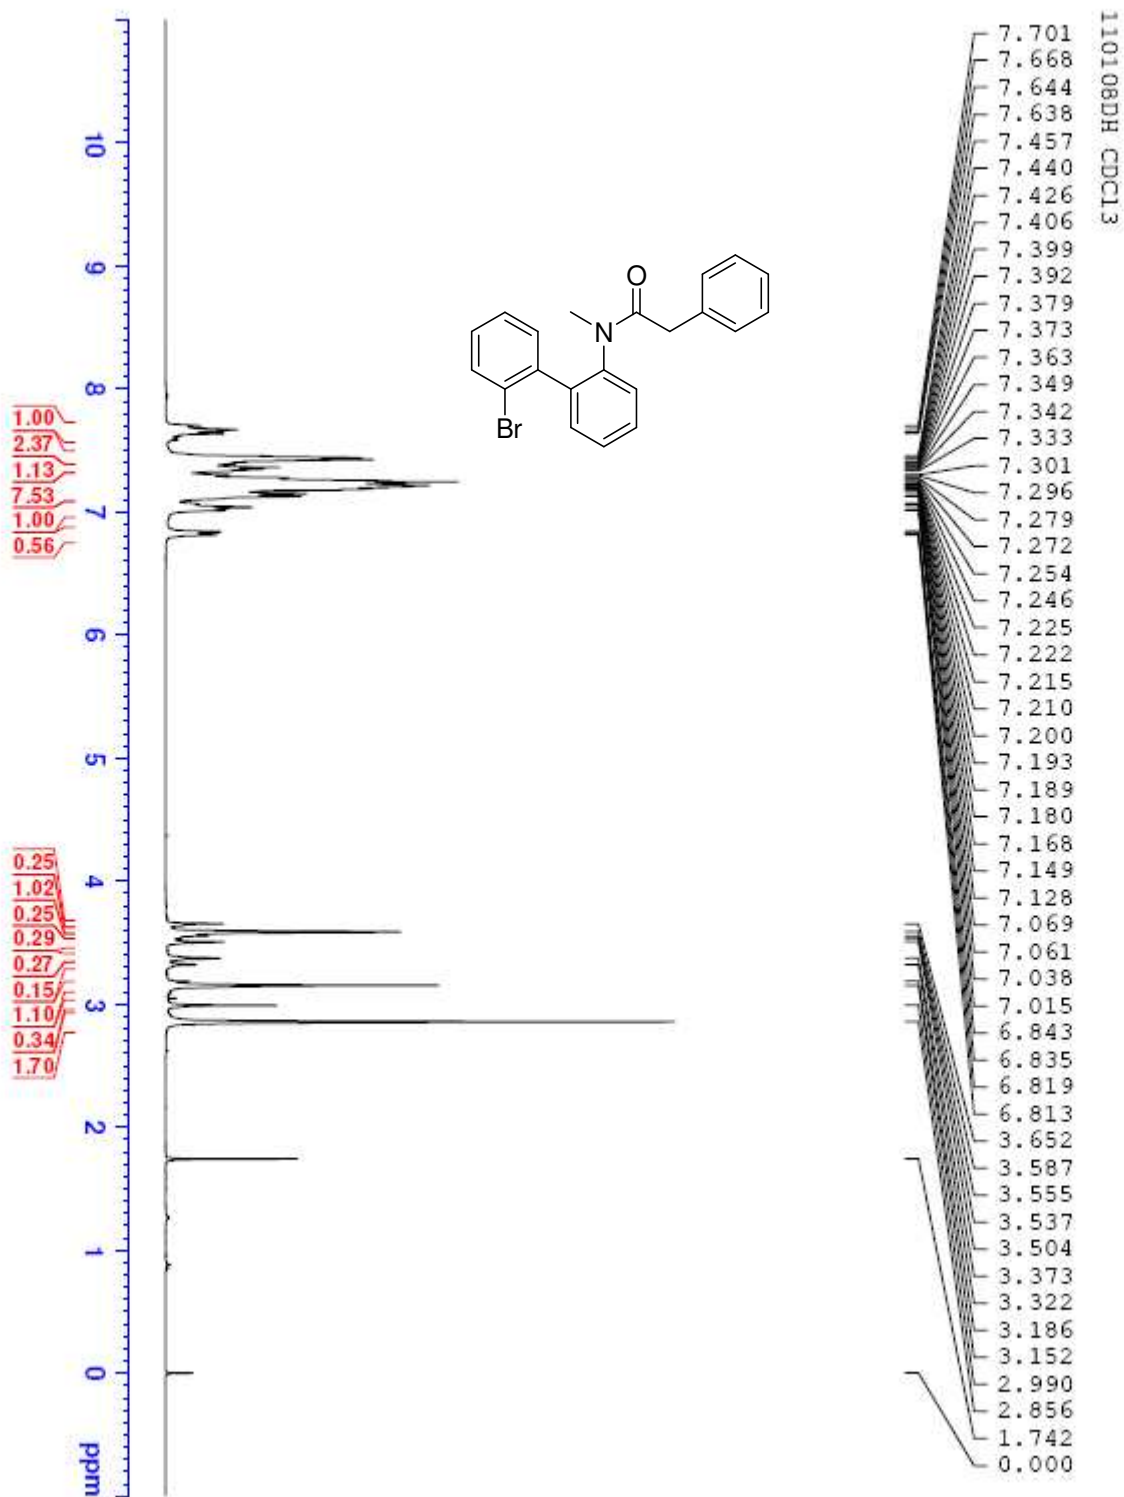

**[1,1'-Biphenyl]-2-(N-methyl-phenylacetamide), 2'-bromo- (11).**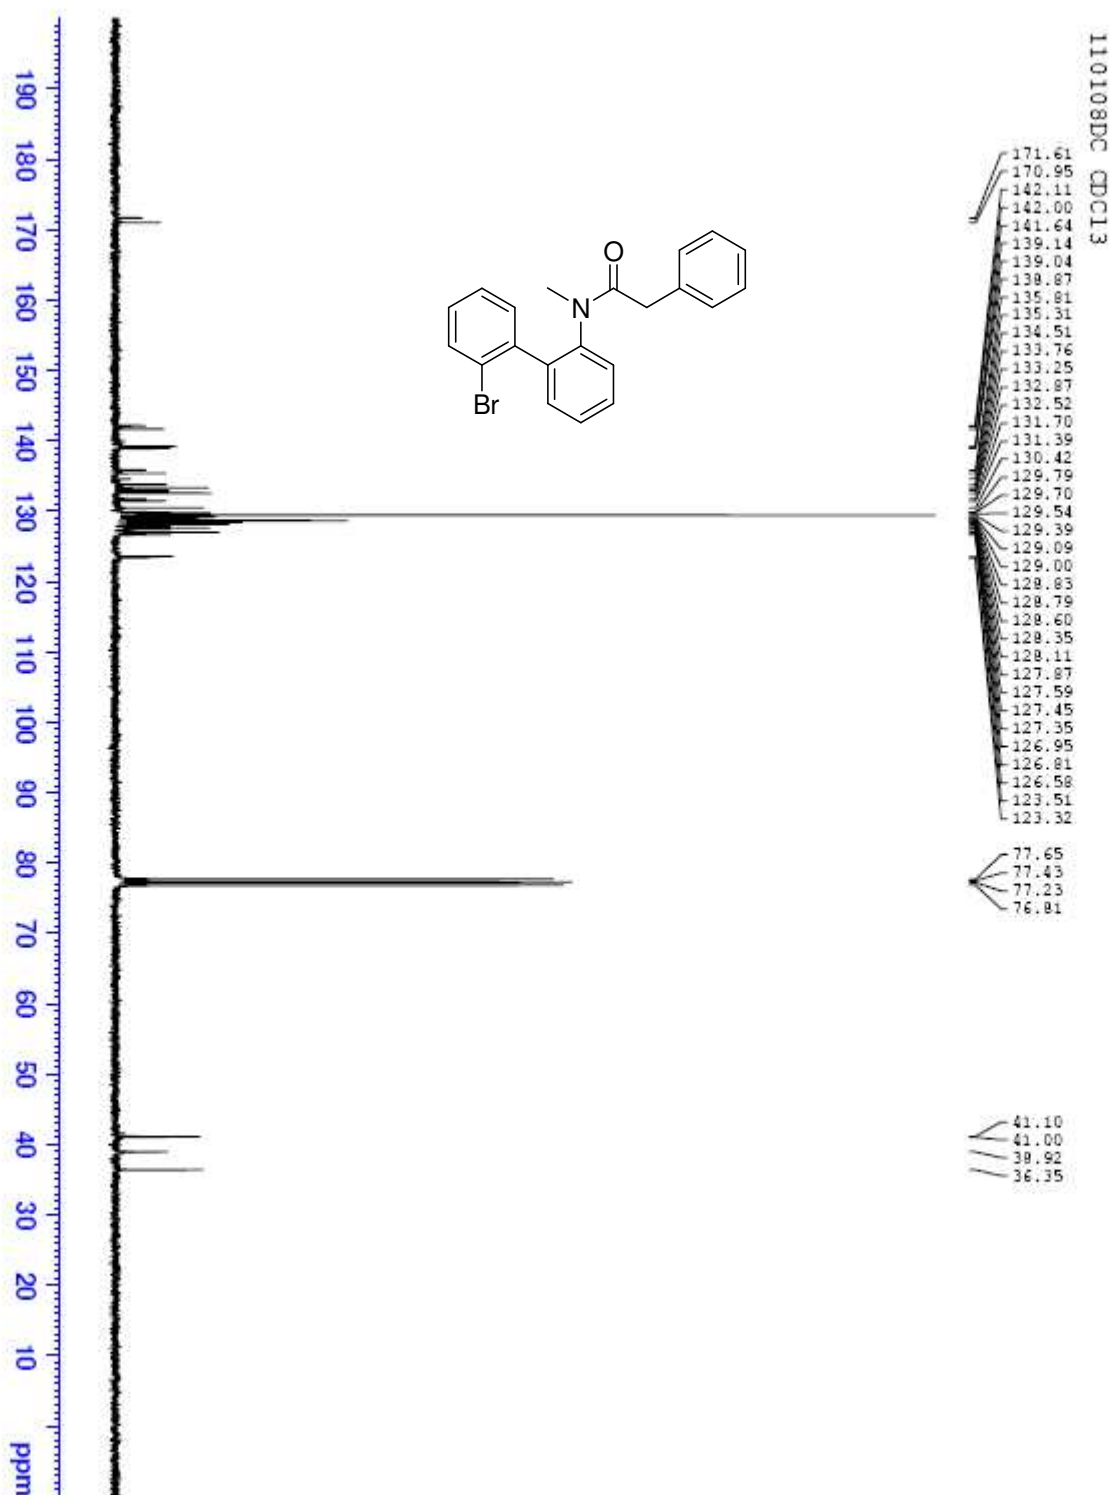



**[1,1'-Biphenyl]-2-(N-methyl-propionamide), 2'-bromo- (12).**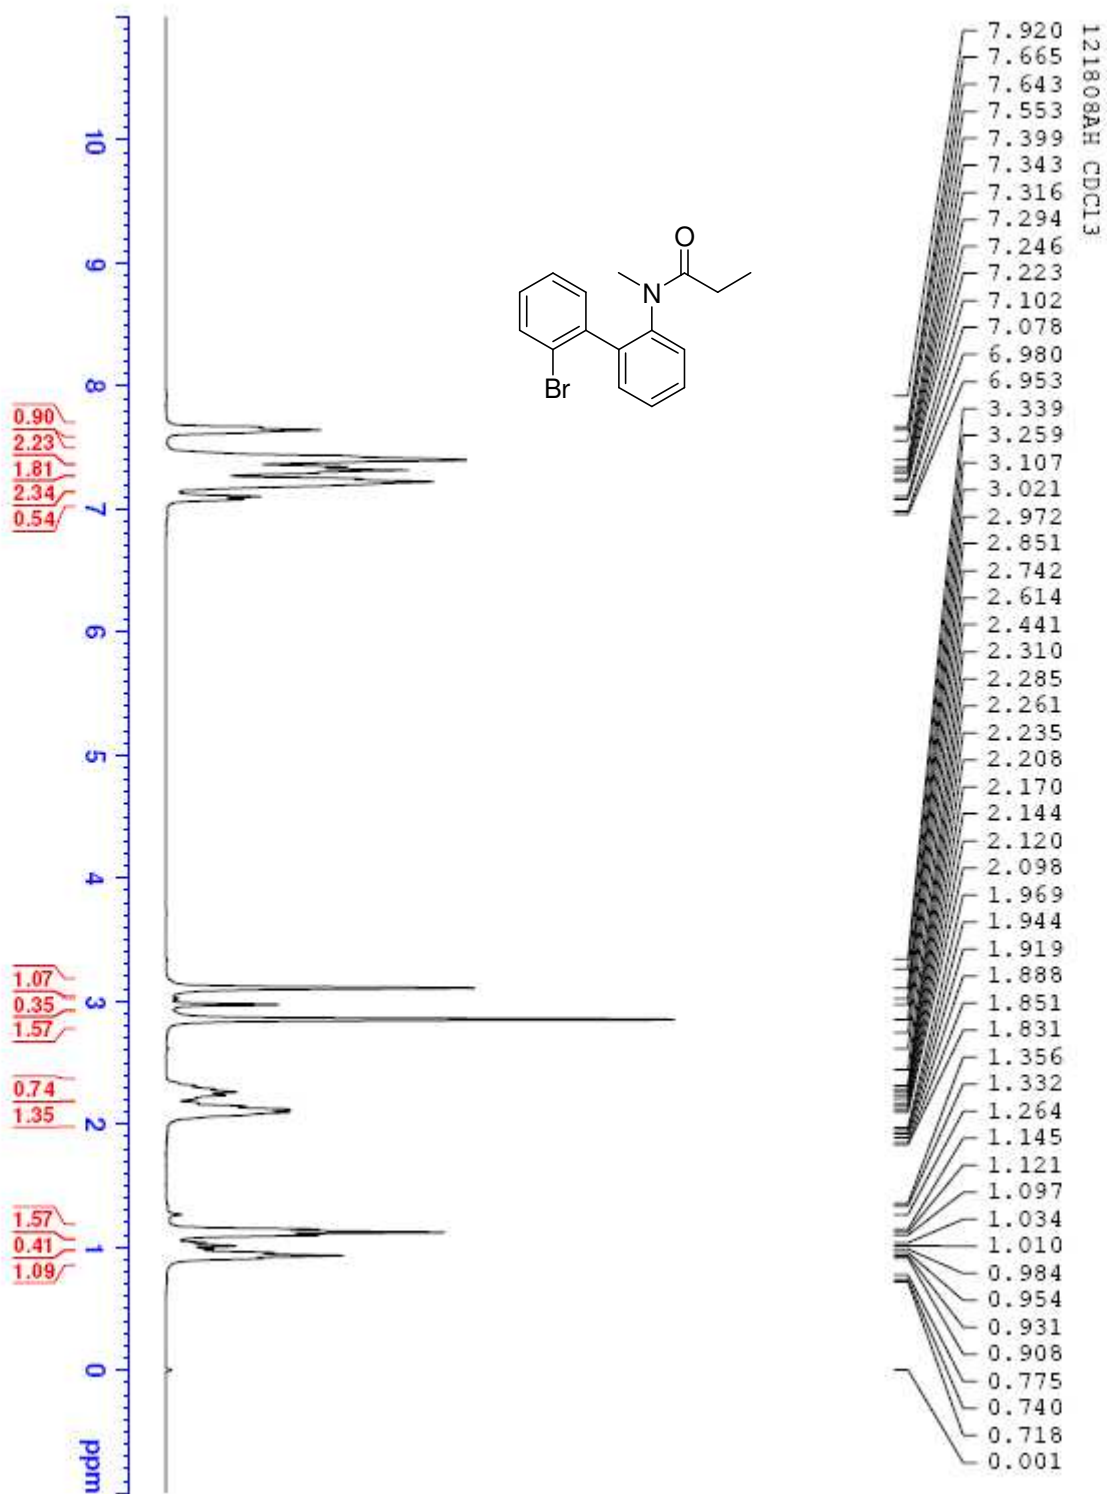



**[1,1'-Biphenyl]-2-(N-methyl-propionamide), 2'-bromo- (12).**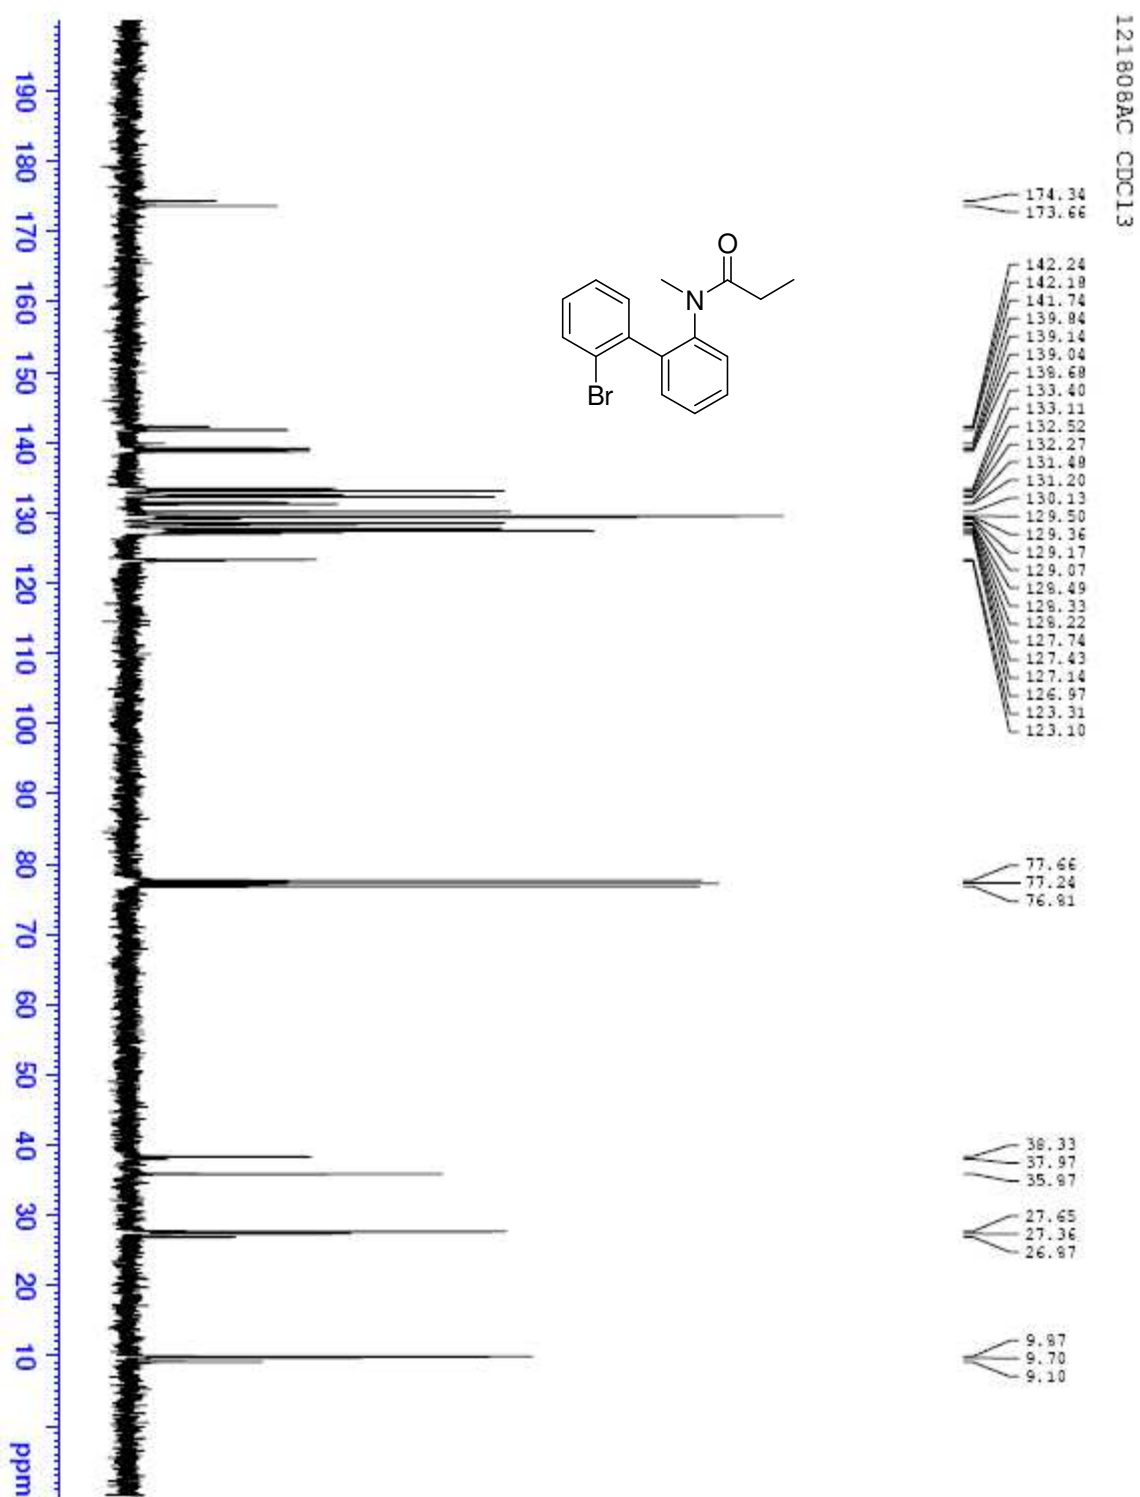

**[1,1'-Biphenyl]-2-(N-methyl-methoxyacetamide), 2'-bromo- (13).**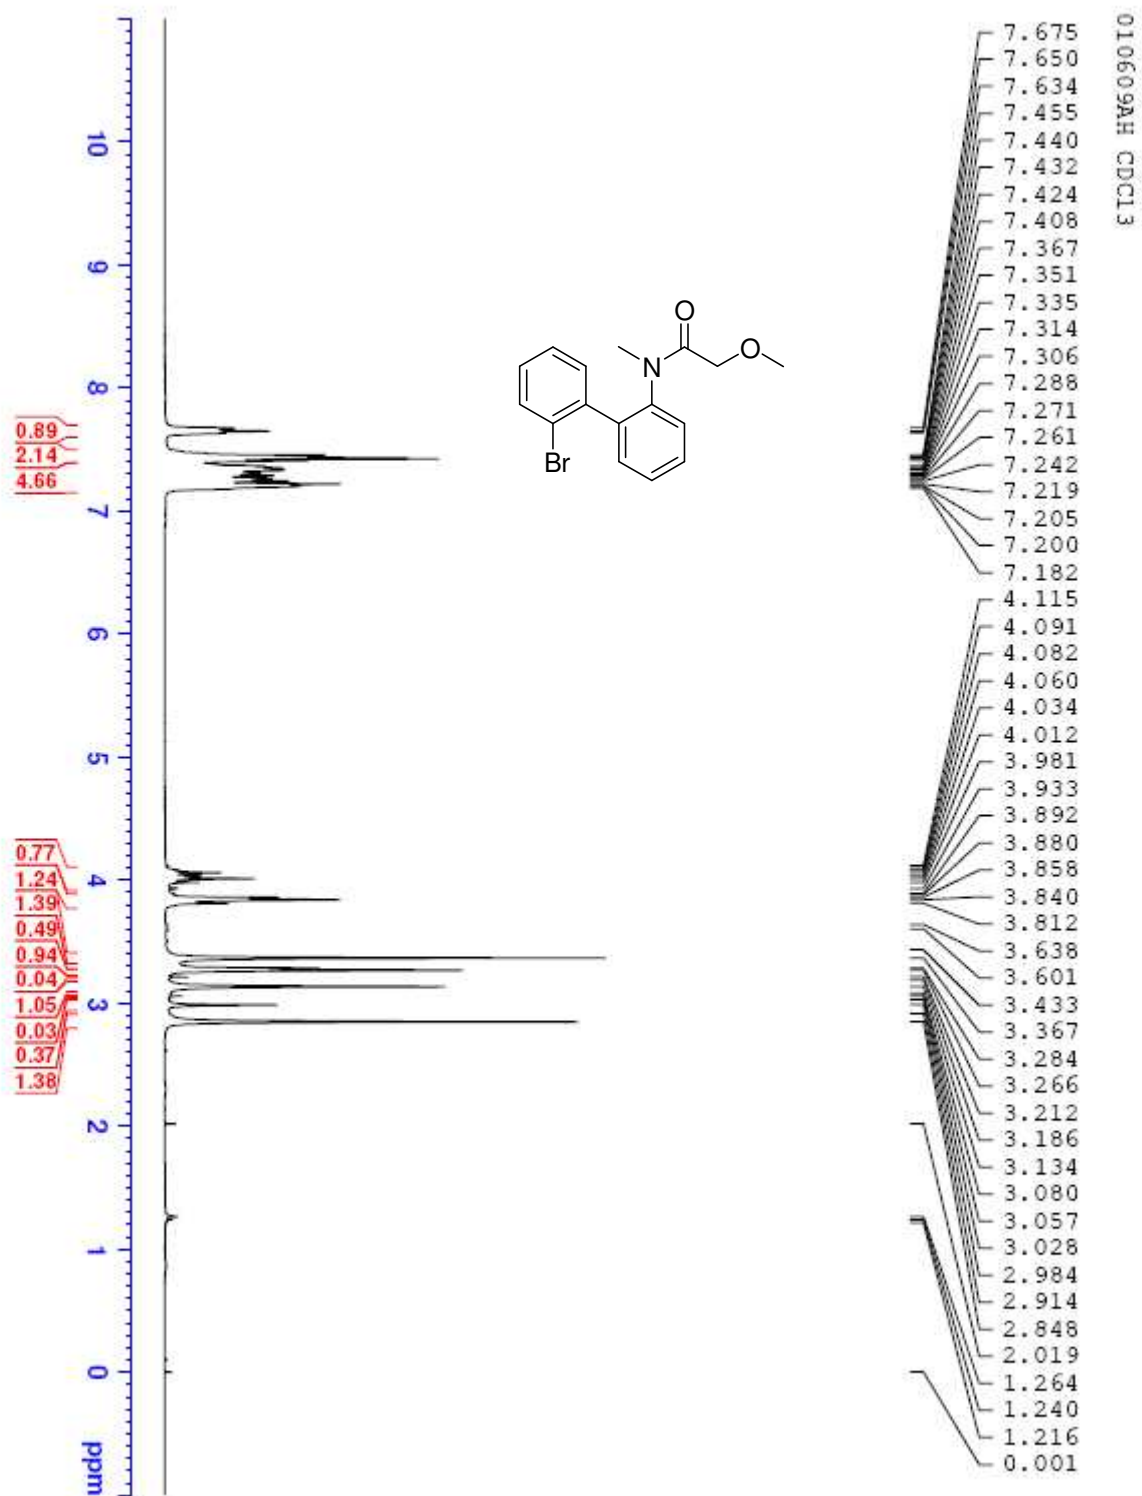

**[1,1'-Biphenyl]-2-(*N*-methyl-methoxyacetamide), 2'-bromo- (13).**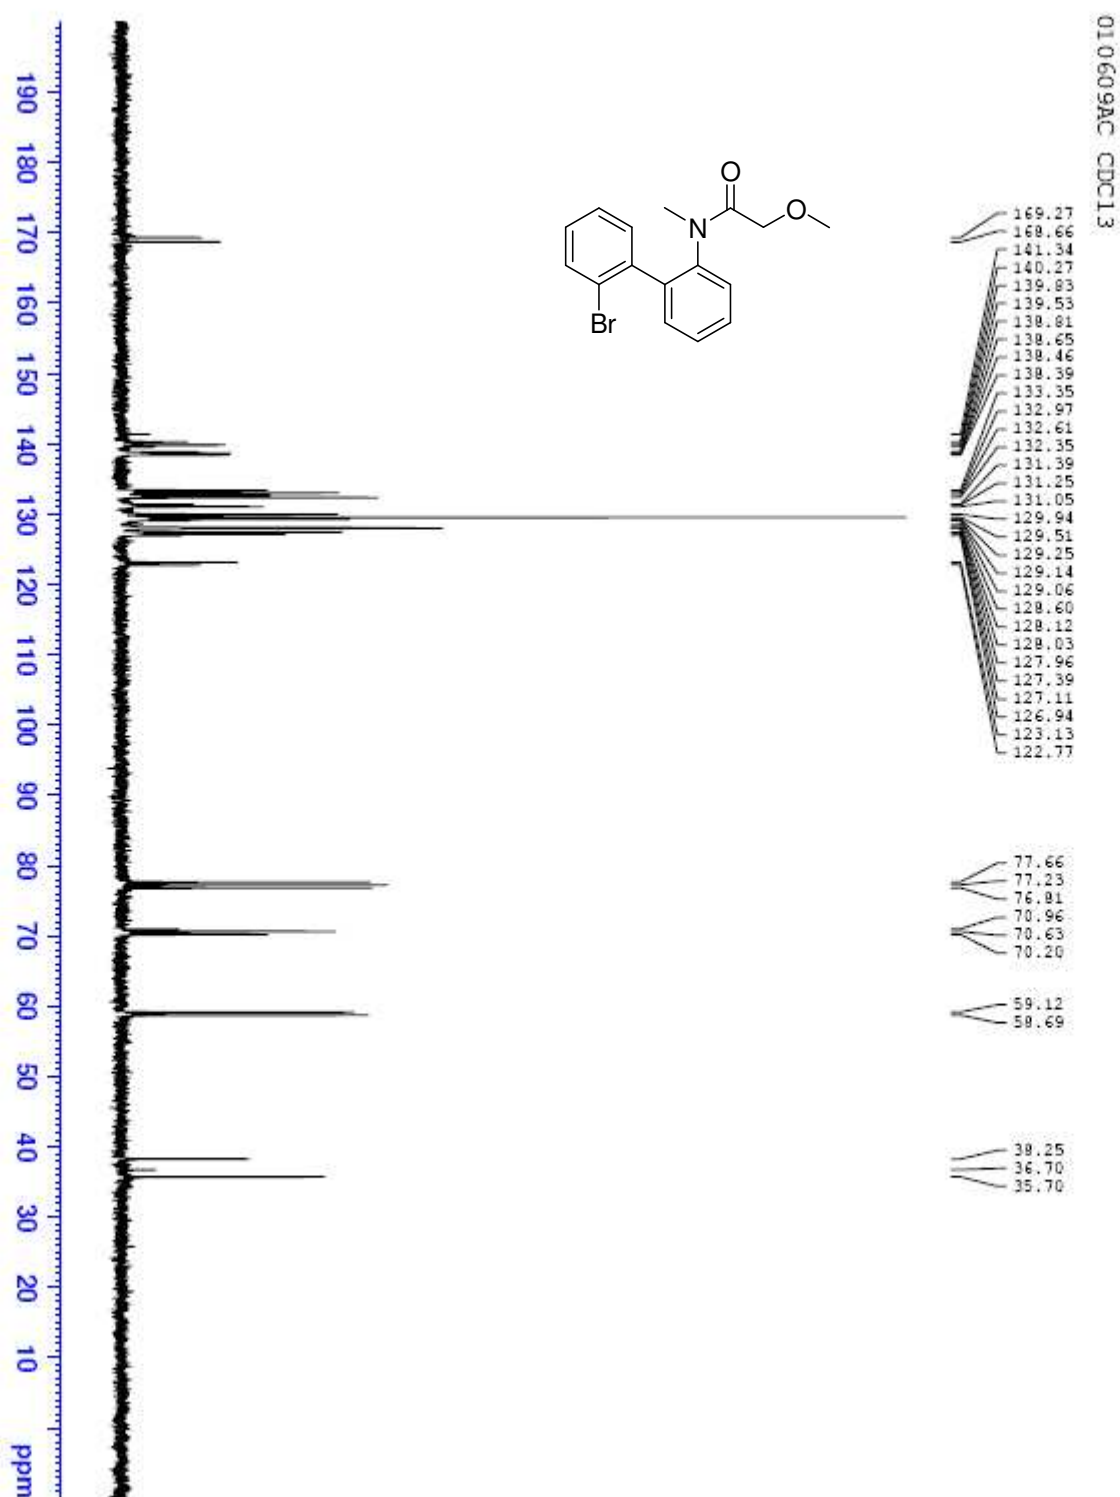

**[1,1'-Biphenyl]-2-(N-methyl-isobutyramide), 2'-bromo- (14).**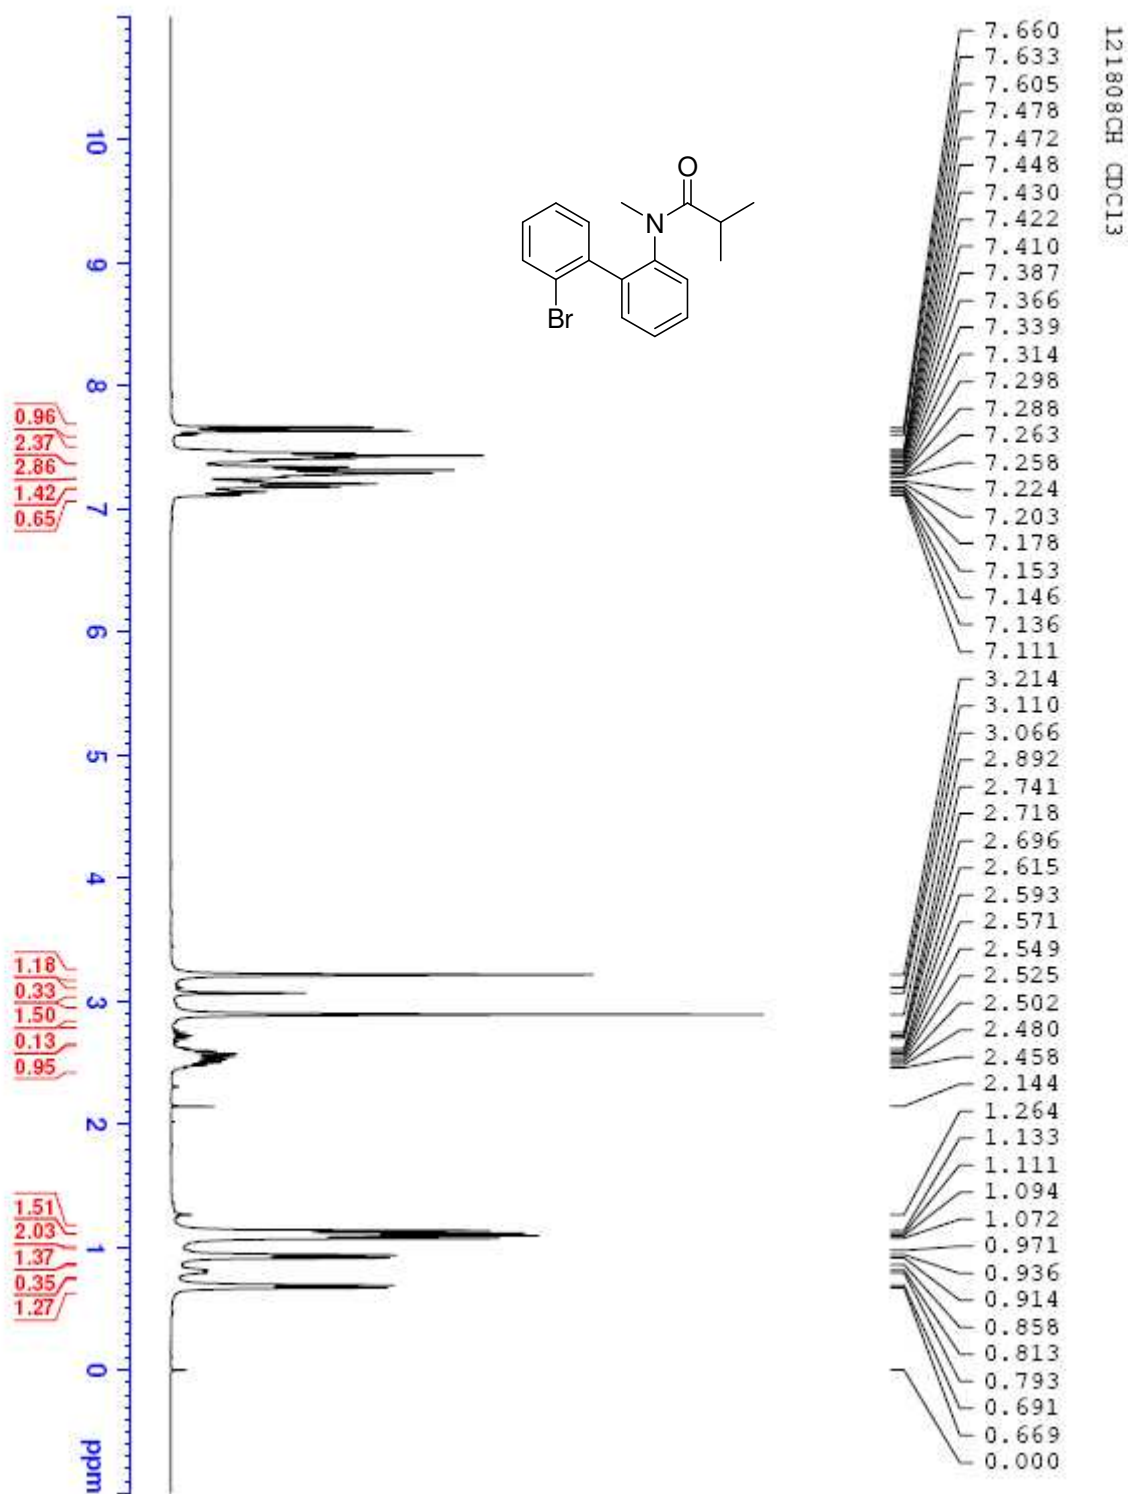

**[1,1'-Biphenyl]-2-(N-methyl-isobutyramide), 2'-bromo- (14).**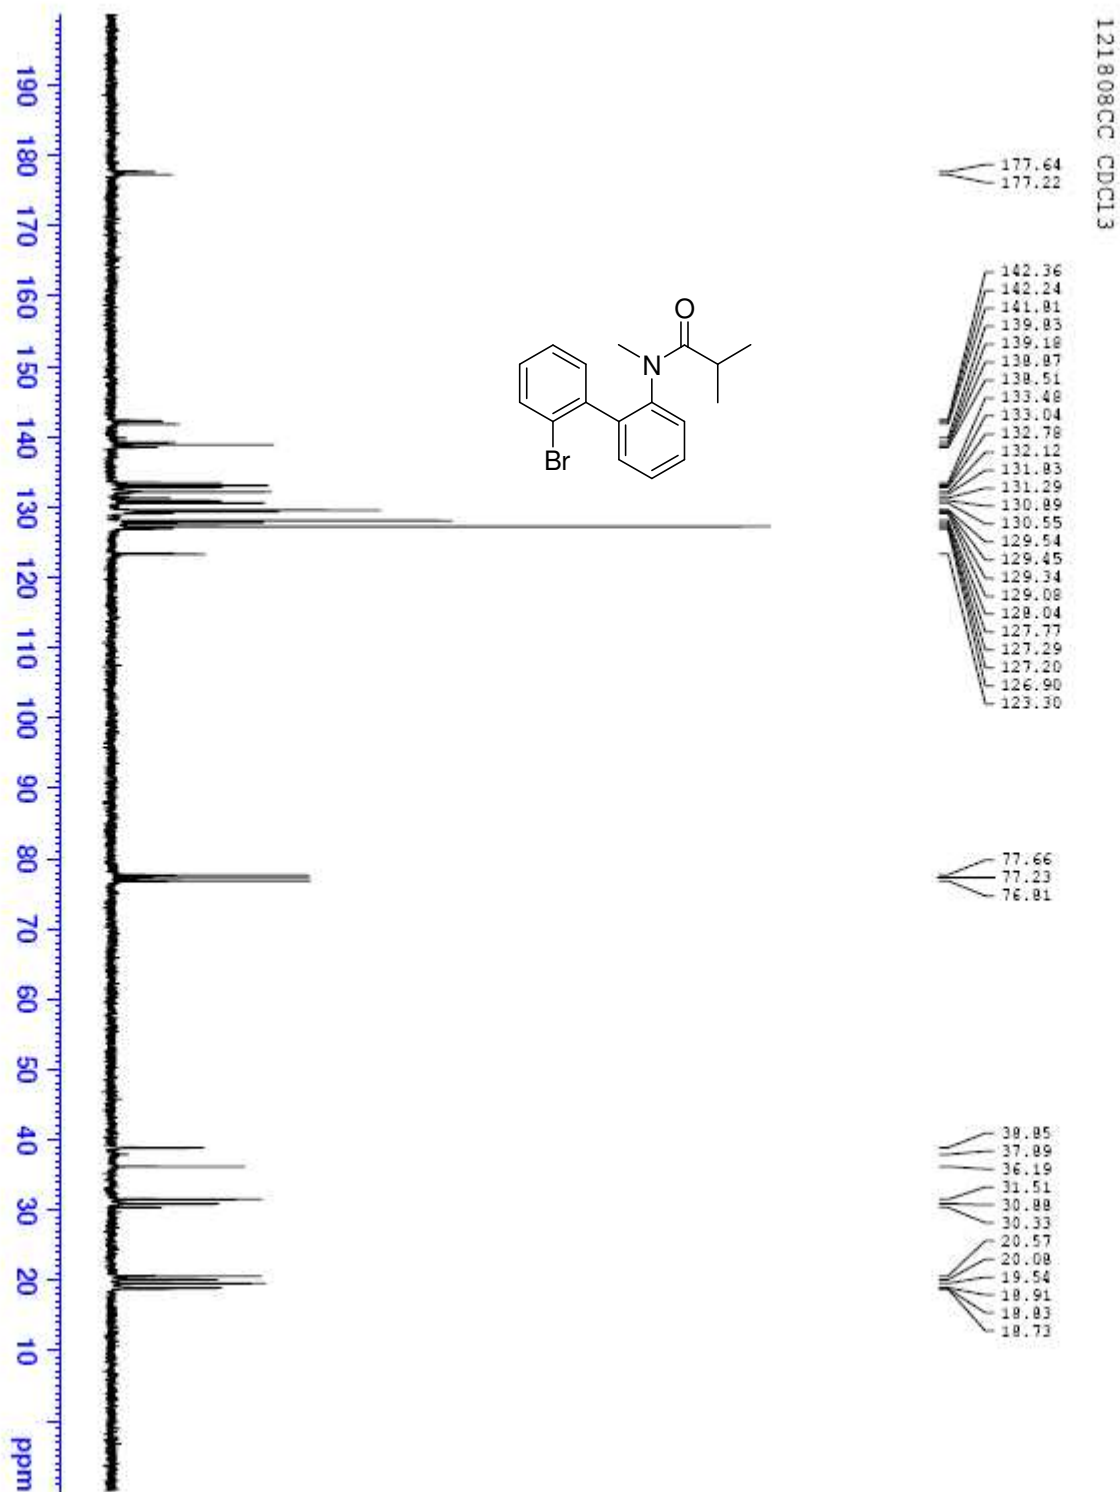

**[1,1'-Biphenyl]-2-(N-methyl-benzyloxyacetamide), 2'-bromo- (15).**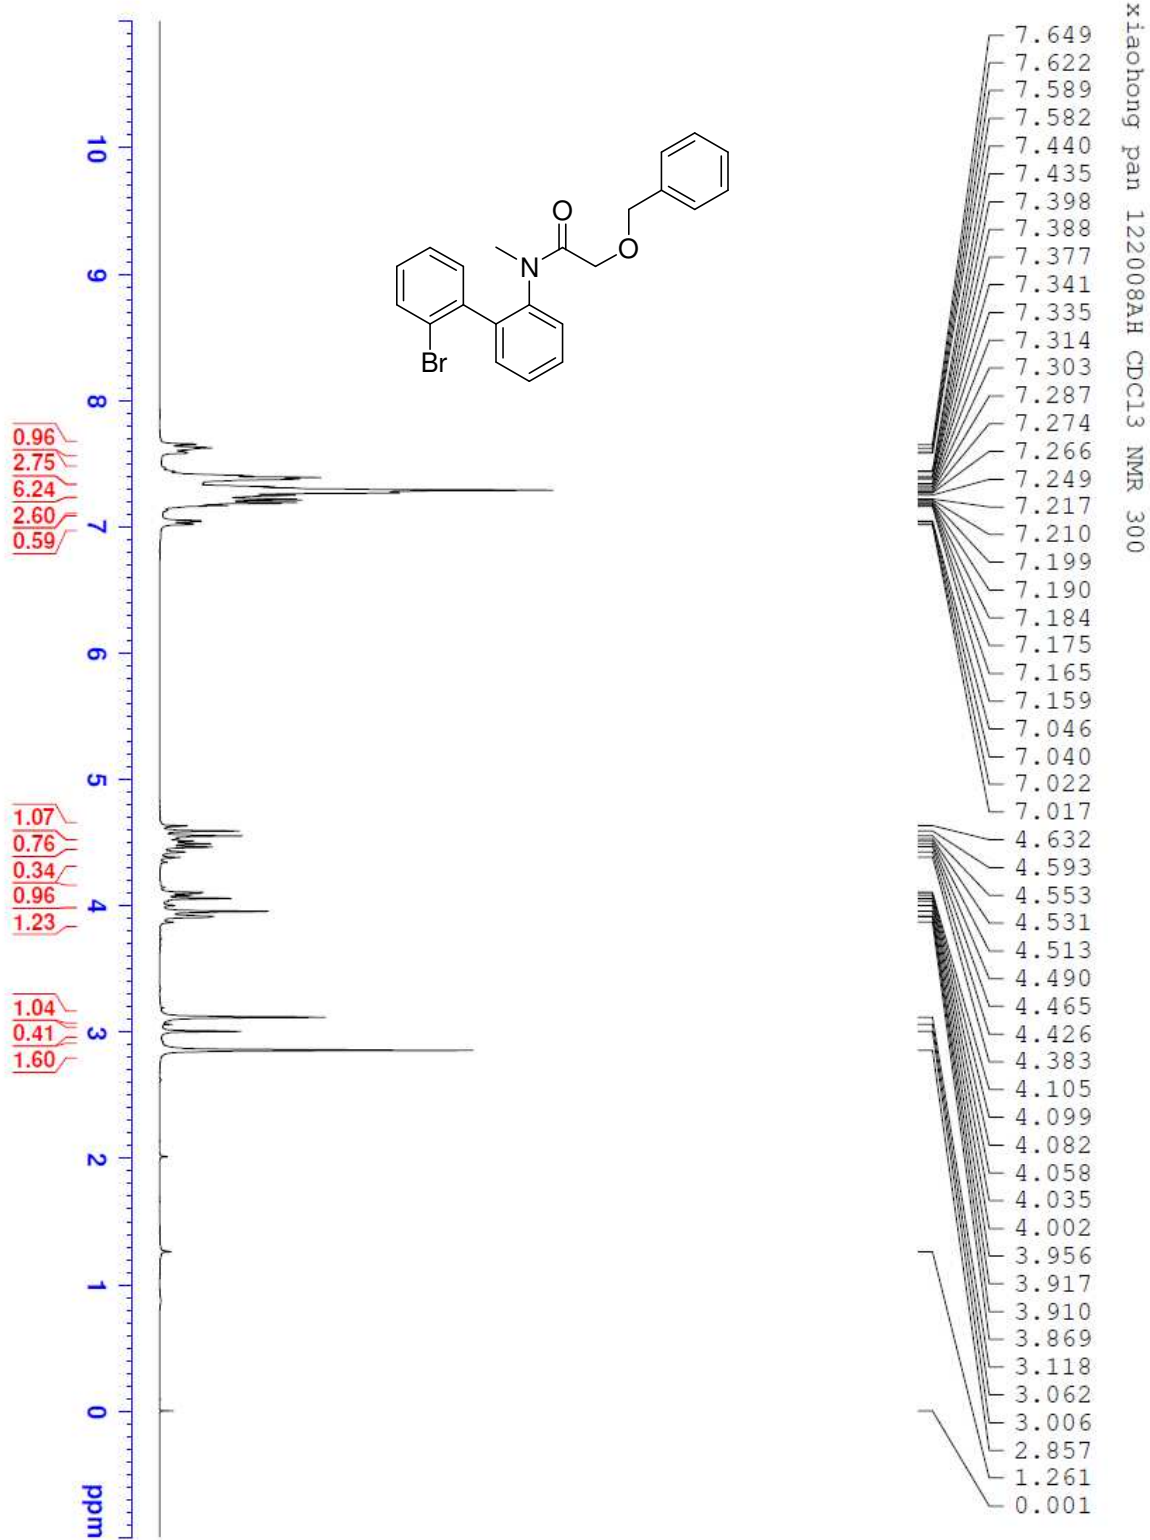

**[1,1'-Biphenyl]-2-(N-methyl-benzyloxyacetamide), 2'-bromo- (15).**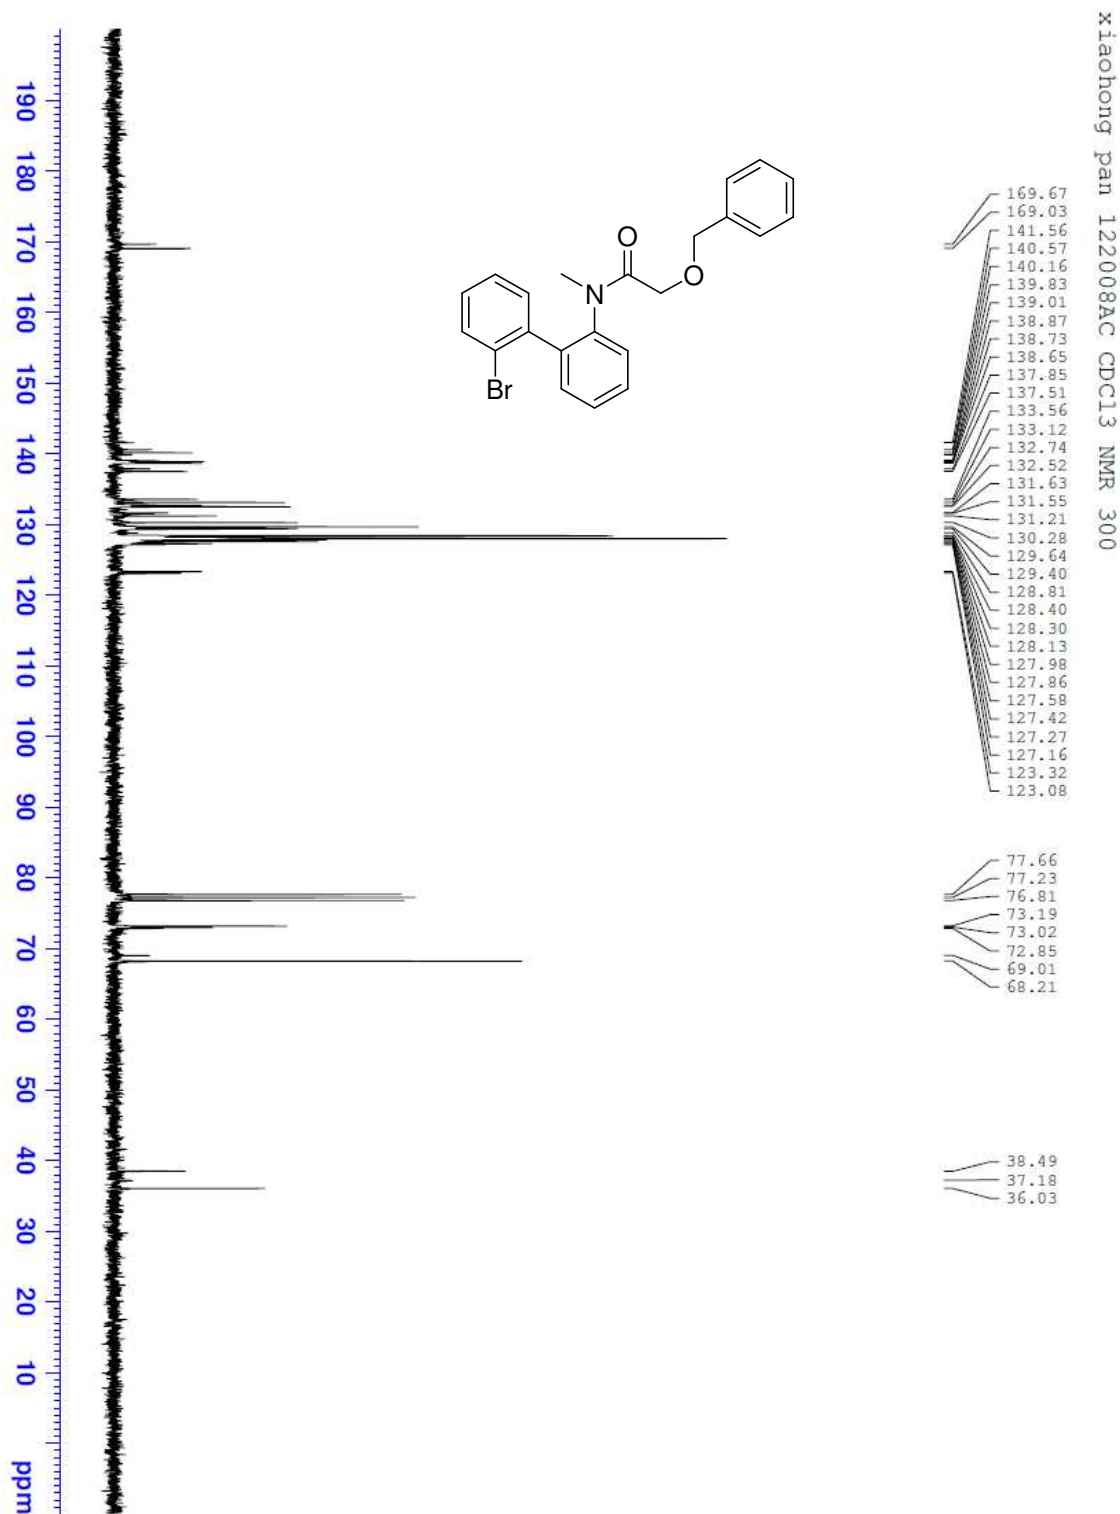



**[1,1'-Biphenyl]-2-(N-methyl-dibenzylaminoacetamide), 2'-bromo- (16).**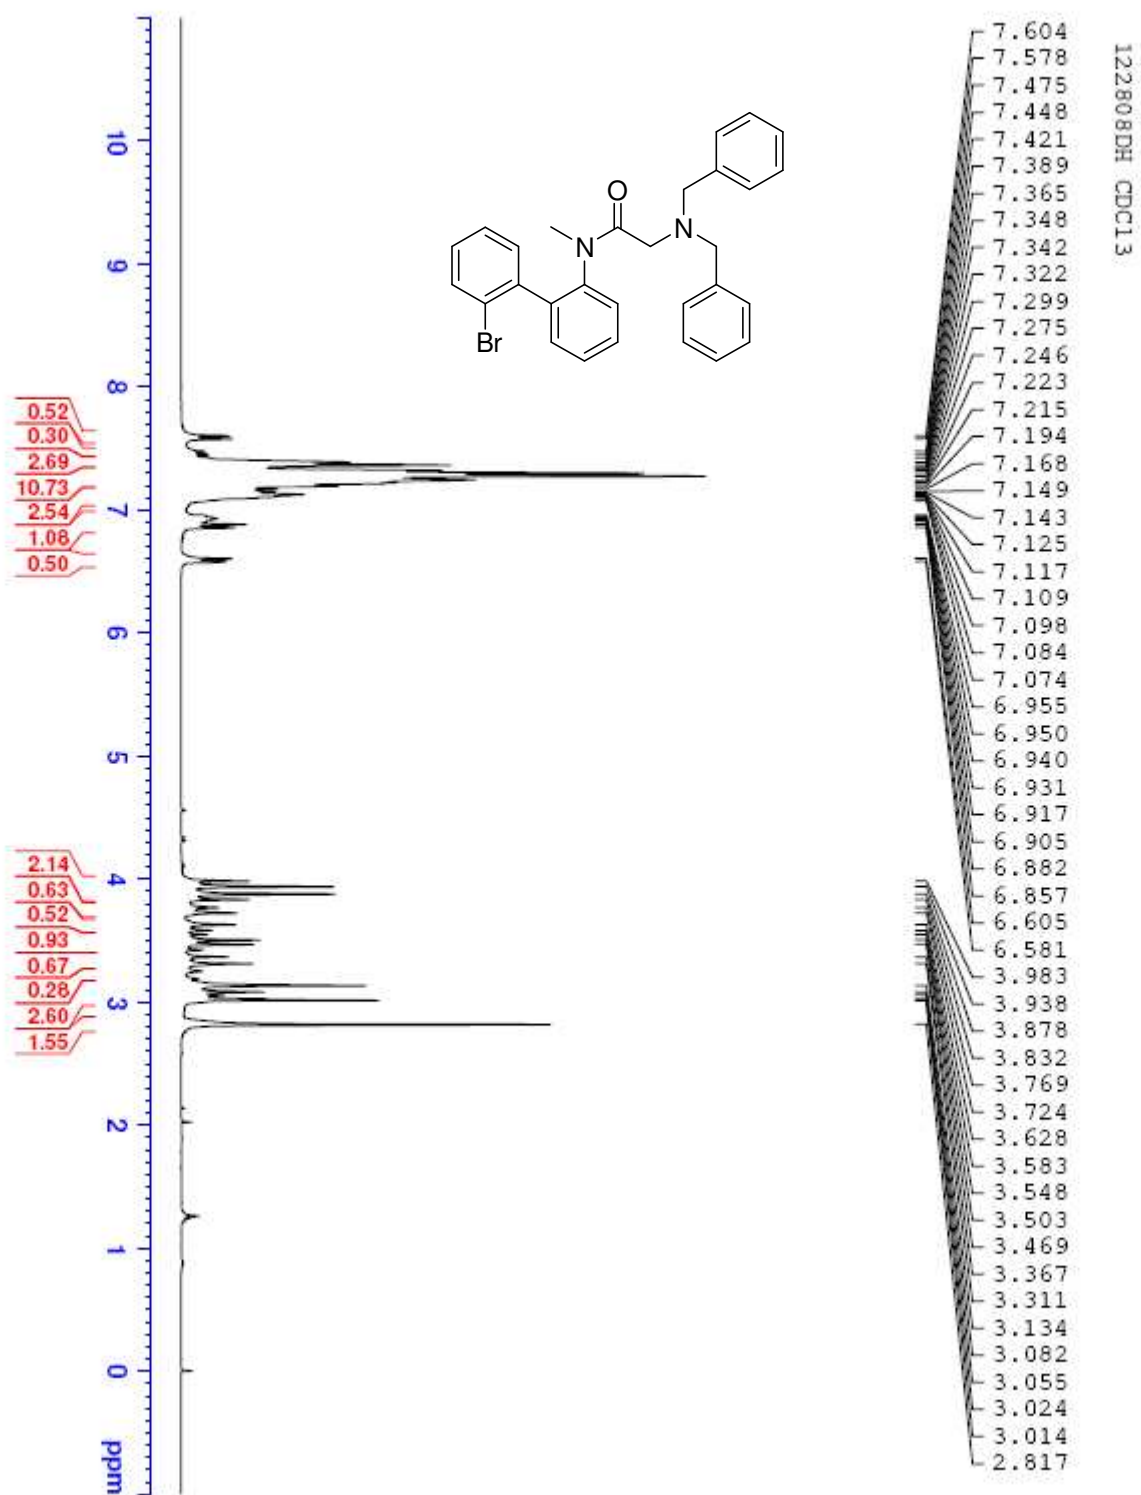



**[1,1'-Biphenyl]-2-(N-methyl-dibenzylaminoacetamide), 2'-bromo- (16).**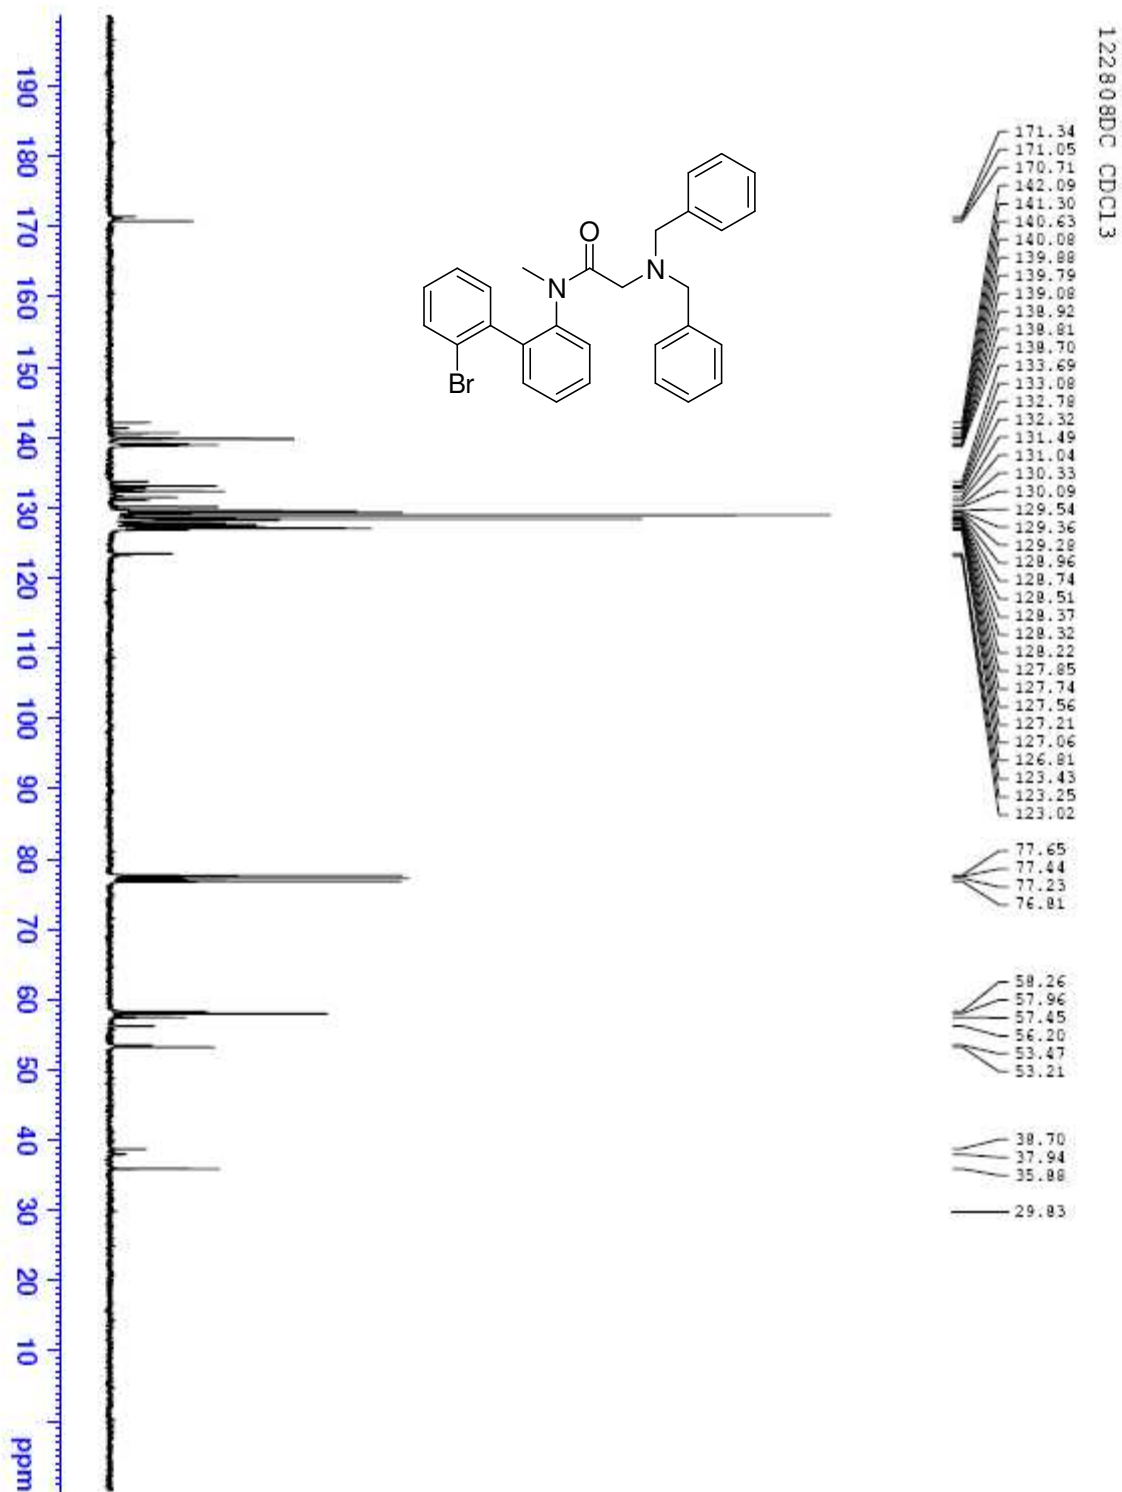

**[1,1'-Biphenyl]-2-(N-benzyl-acetamide), 2'-bromo- (17).**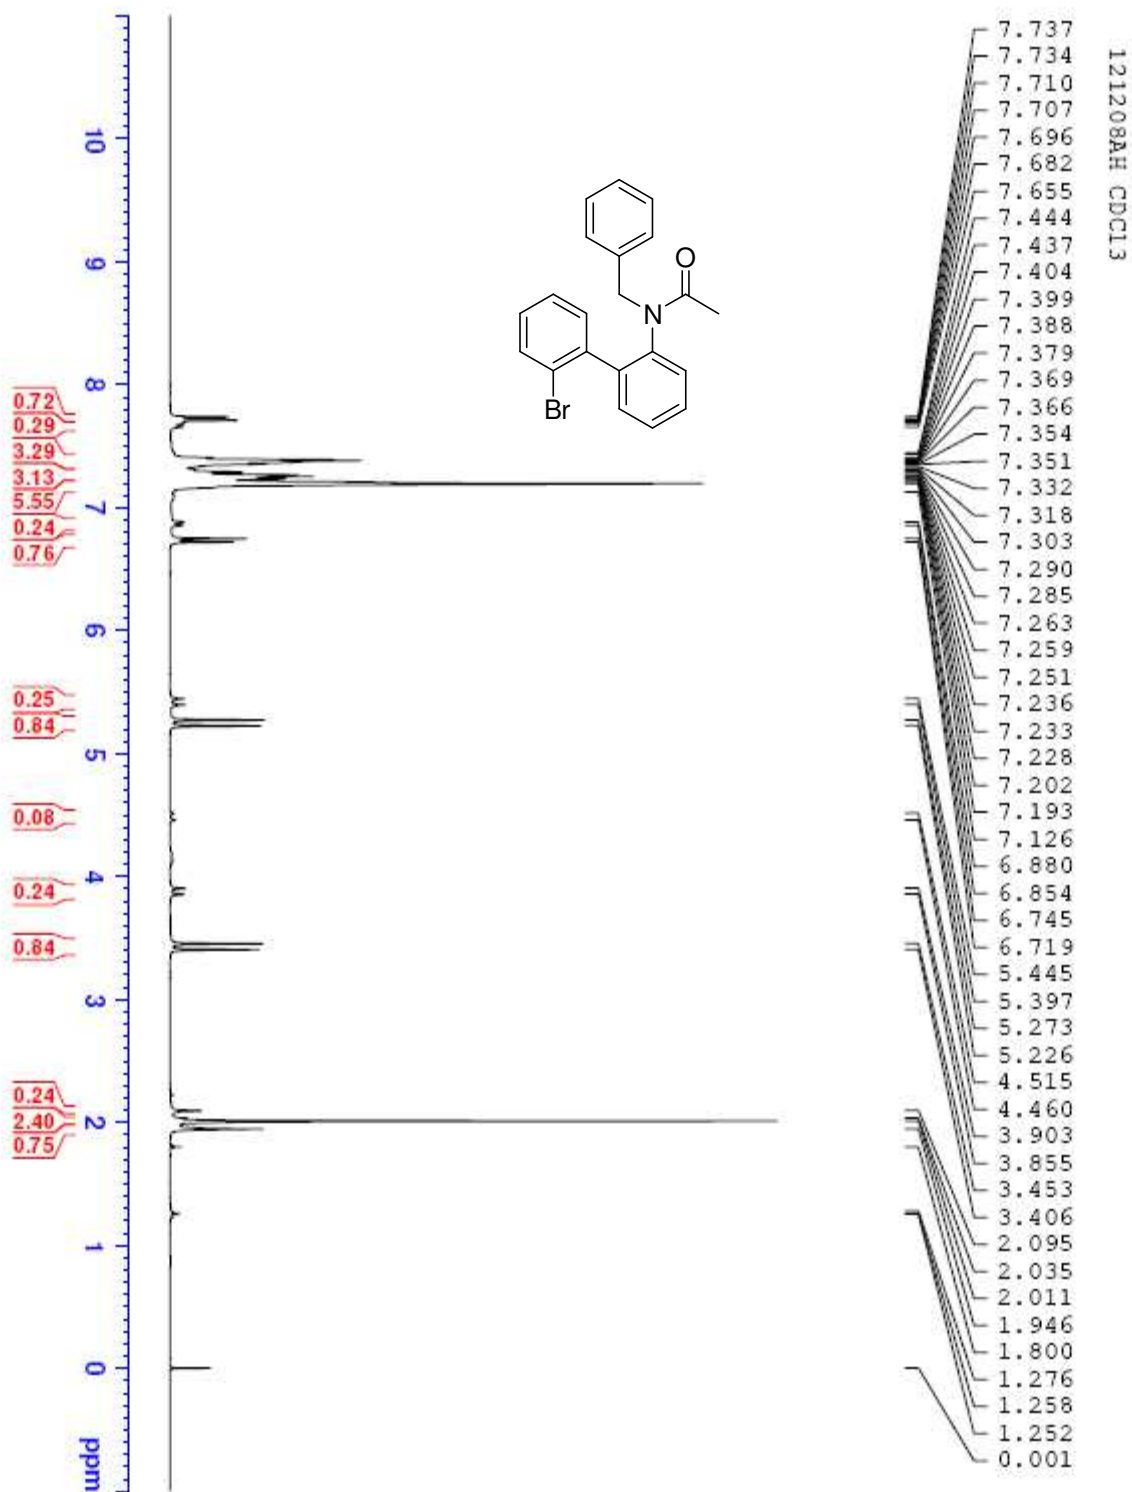

**[1,1'-Biphenyl]-2-(N-benzyl-acetamide), 2'-bromo- (17).**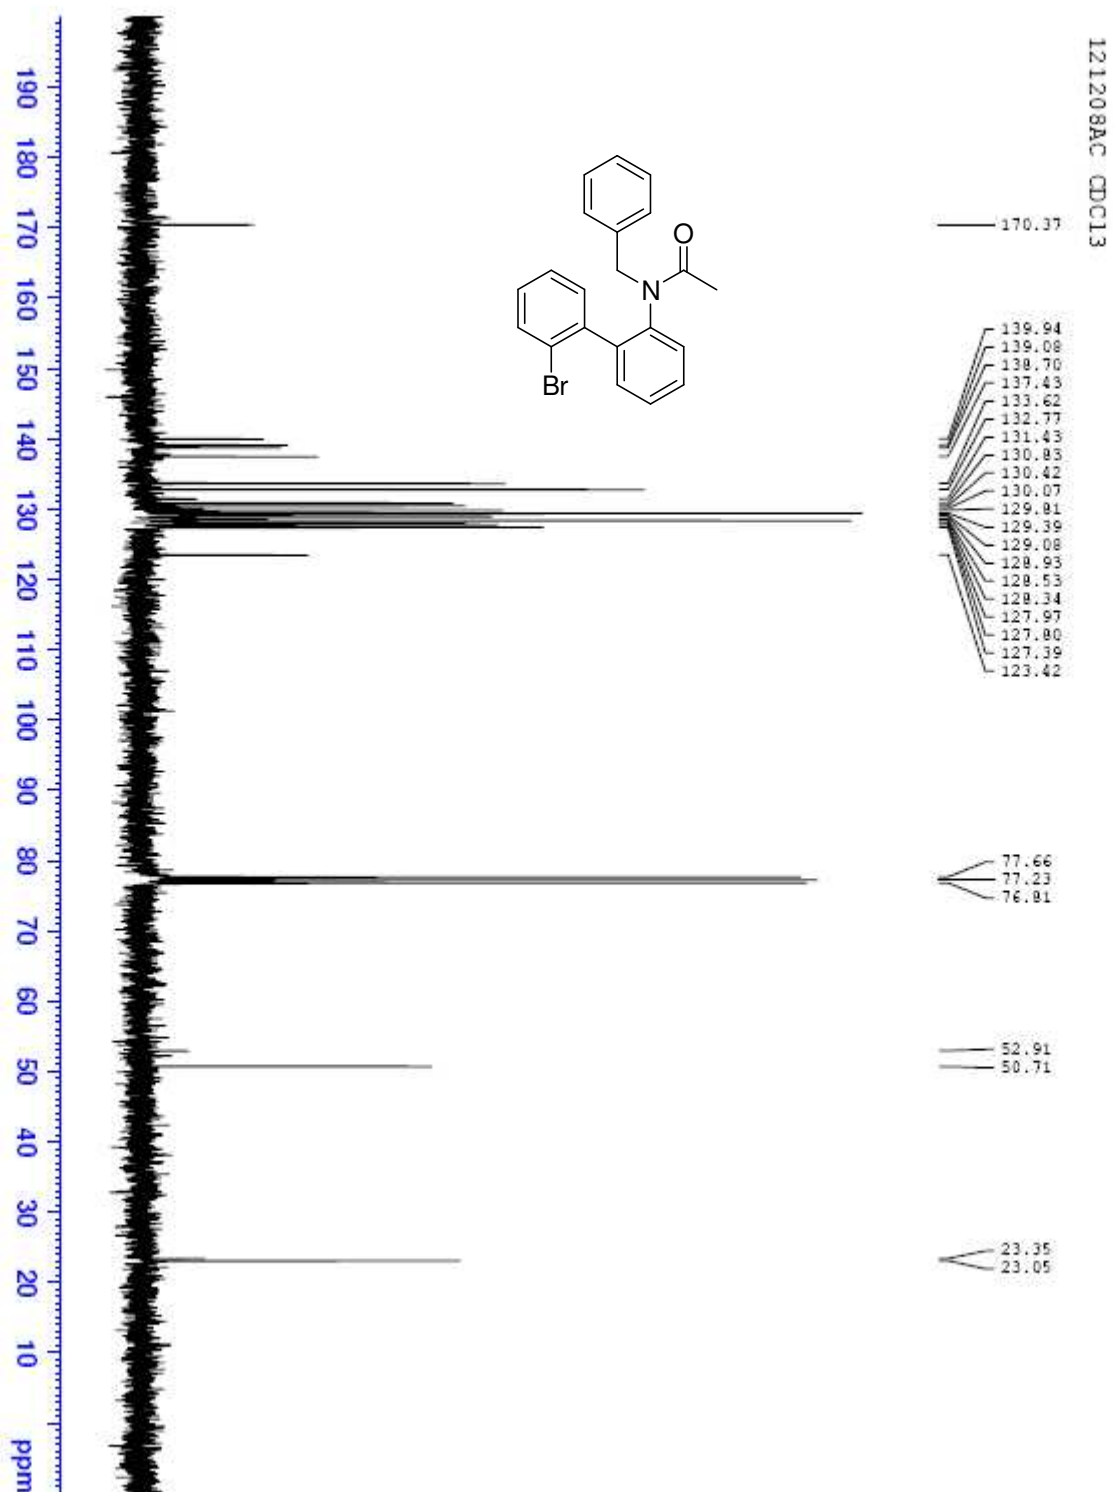

**[1,1'-Biphenyl]-2-amine, 2'-chloro- (21).**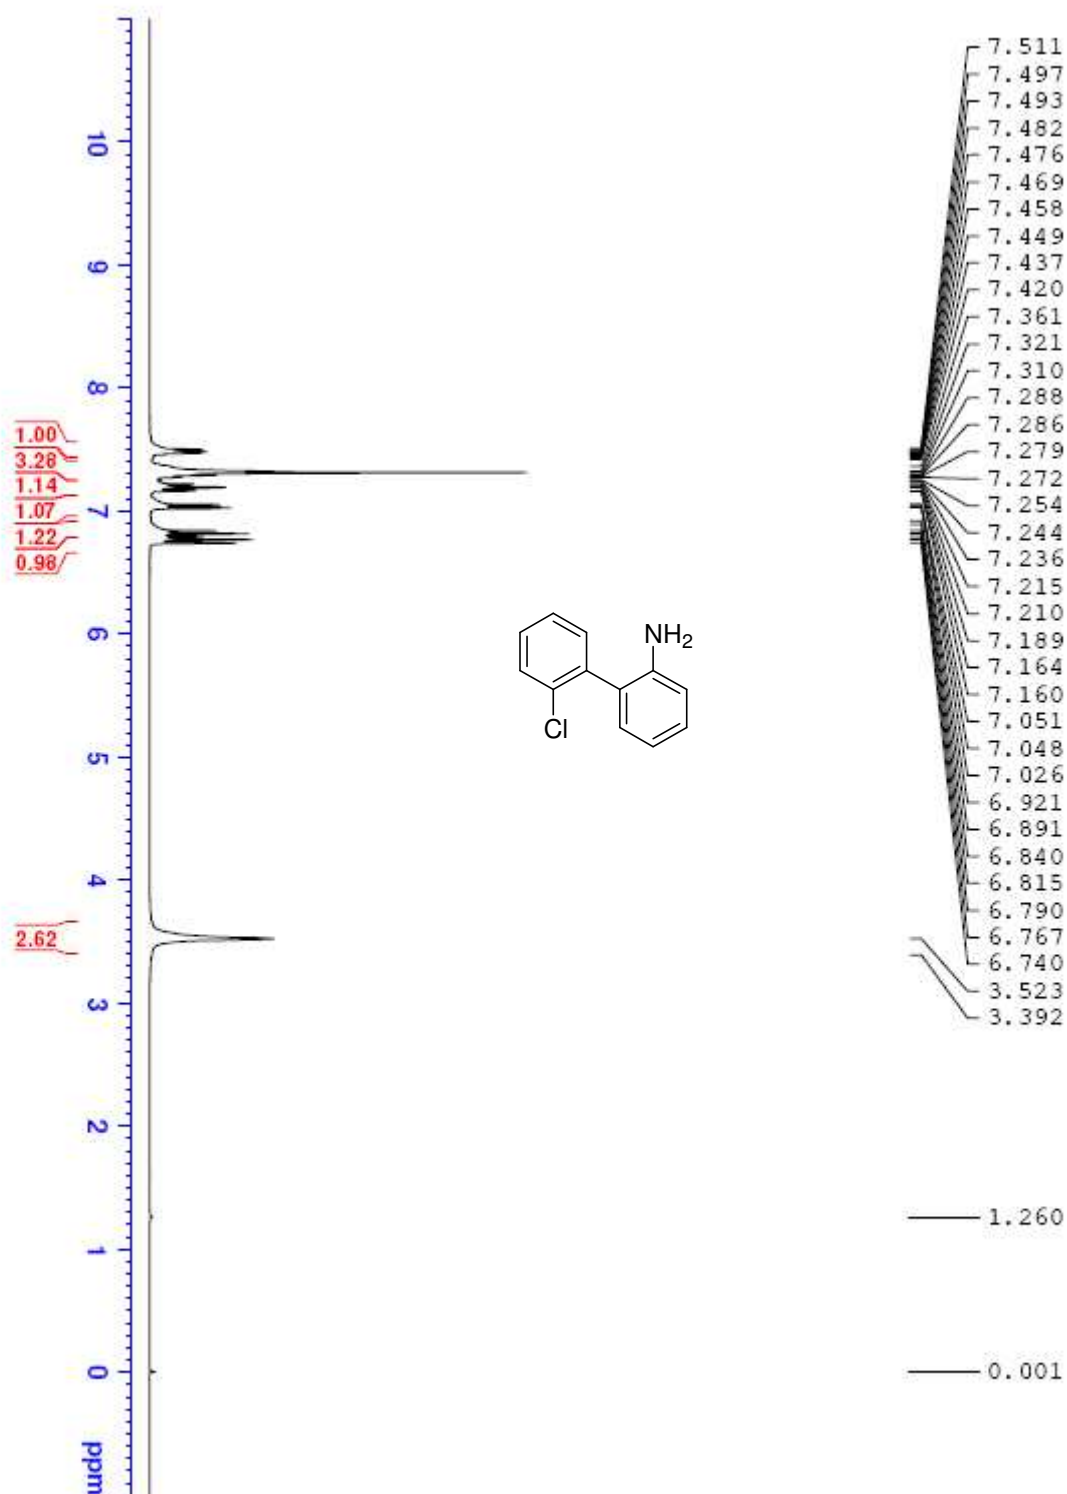

**[1,1'-Biphenyl]-2-amine, 2'-chloro- (21).**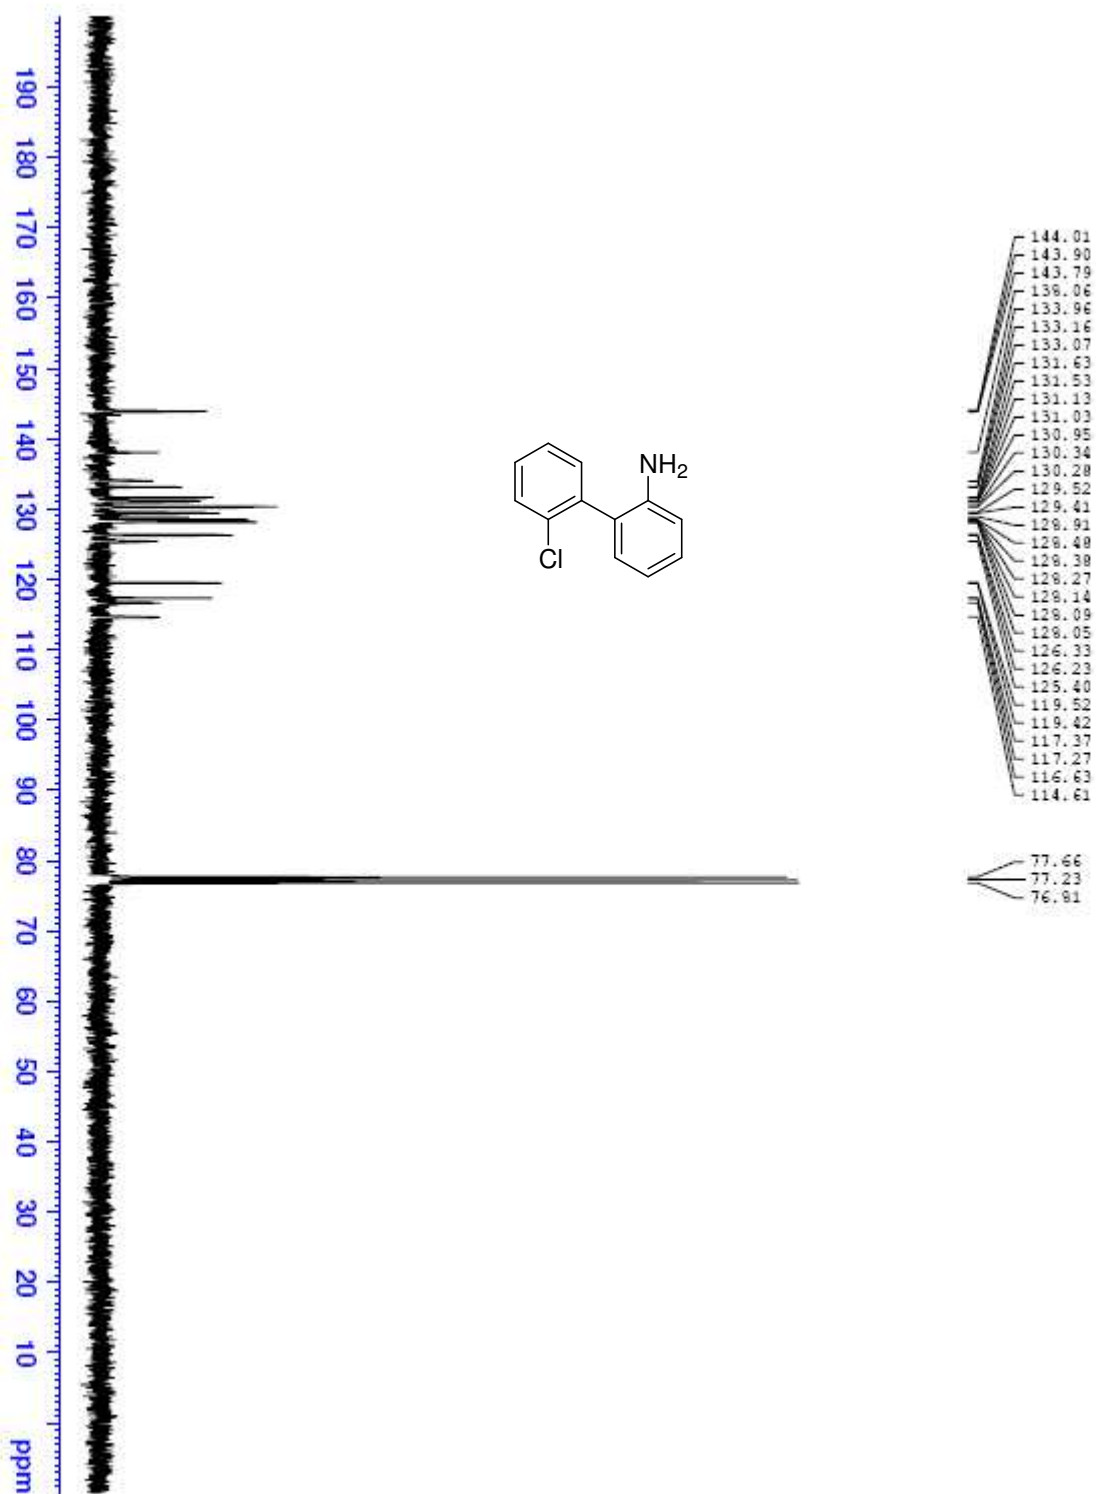

**[1,1'-Biphenyl]-2-acetamide, 2'-chloro- (22).**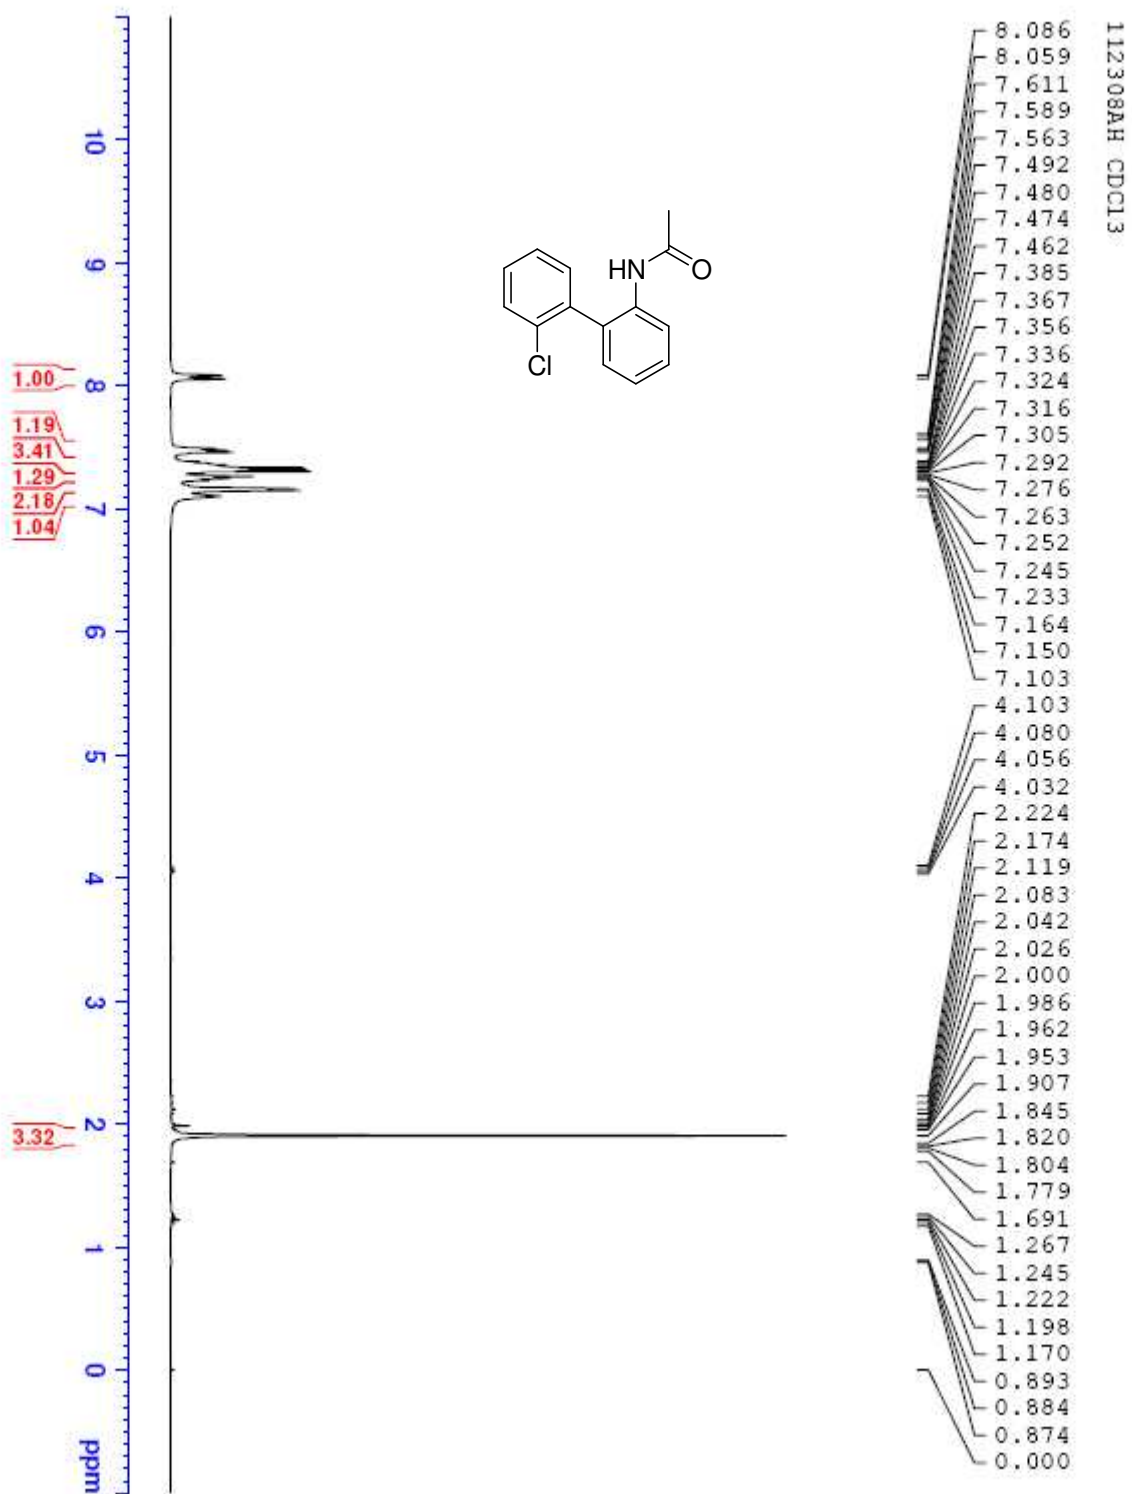

**[1,1'-Biphenyl]-2-acetamide, 2'-chloro- (22).**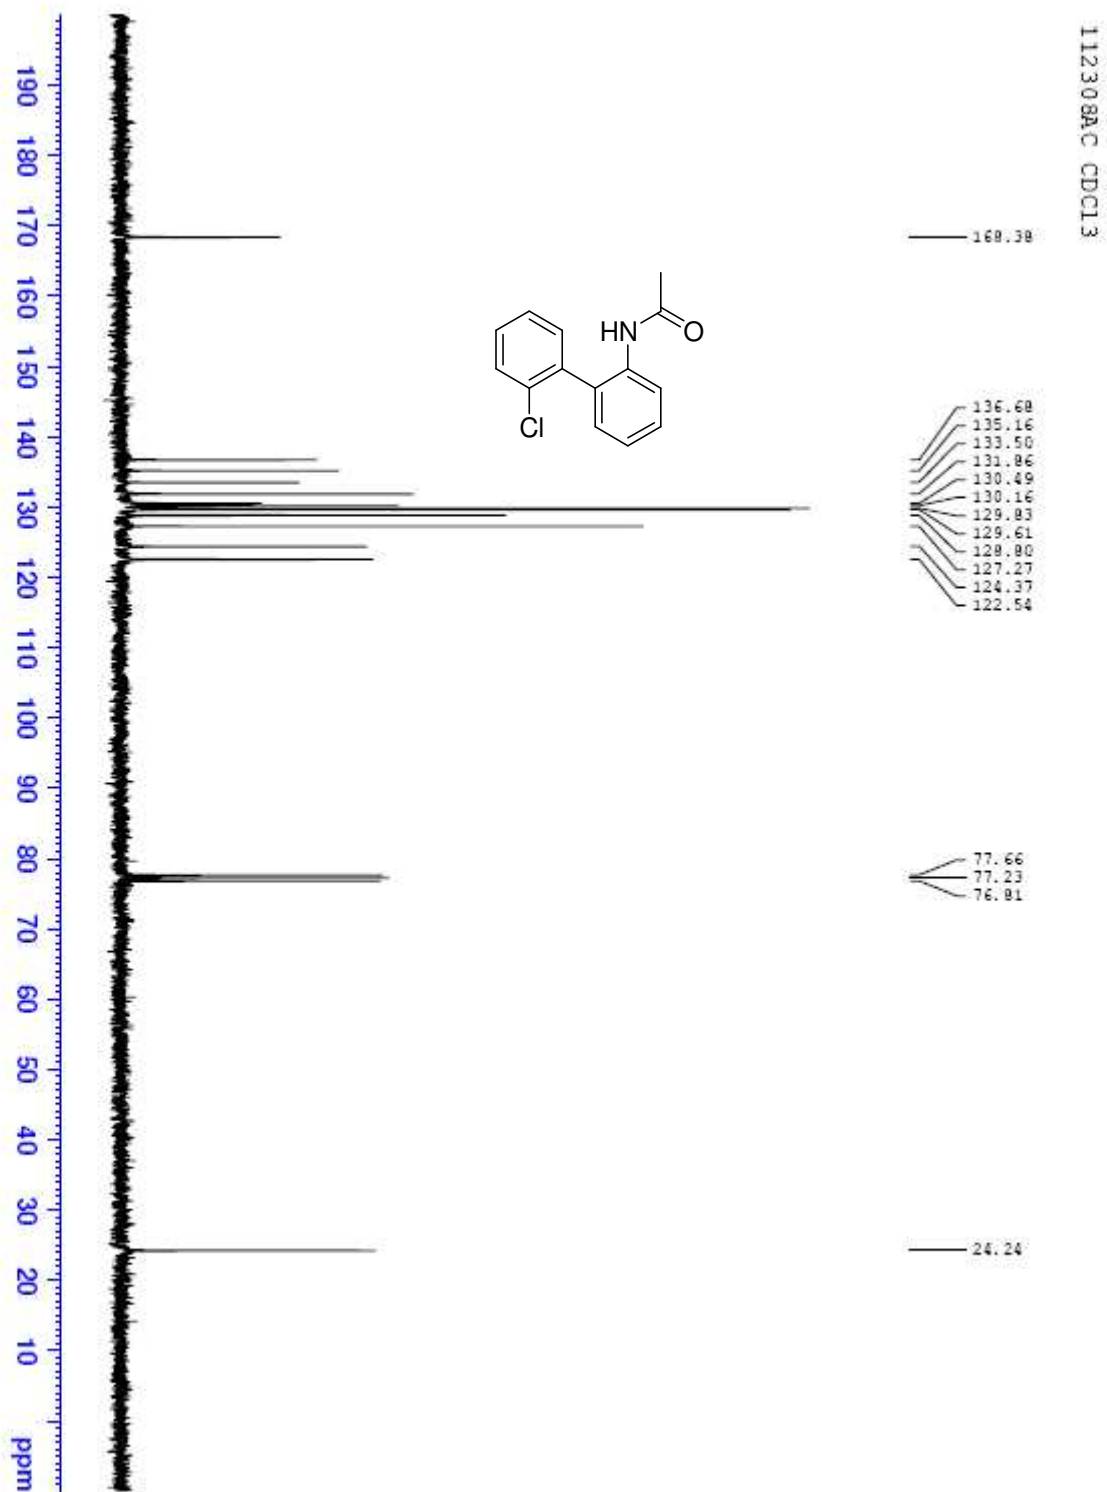

**[1,1'-Biphenyl]-2-(*N*-methyl-acetamide), 2'-chloro- (23).**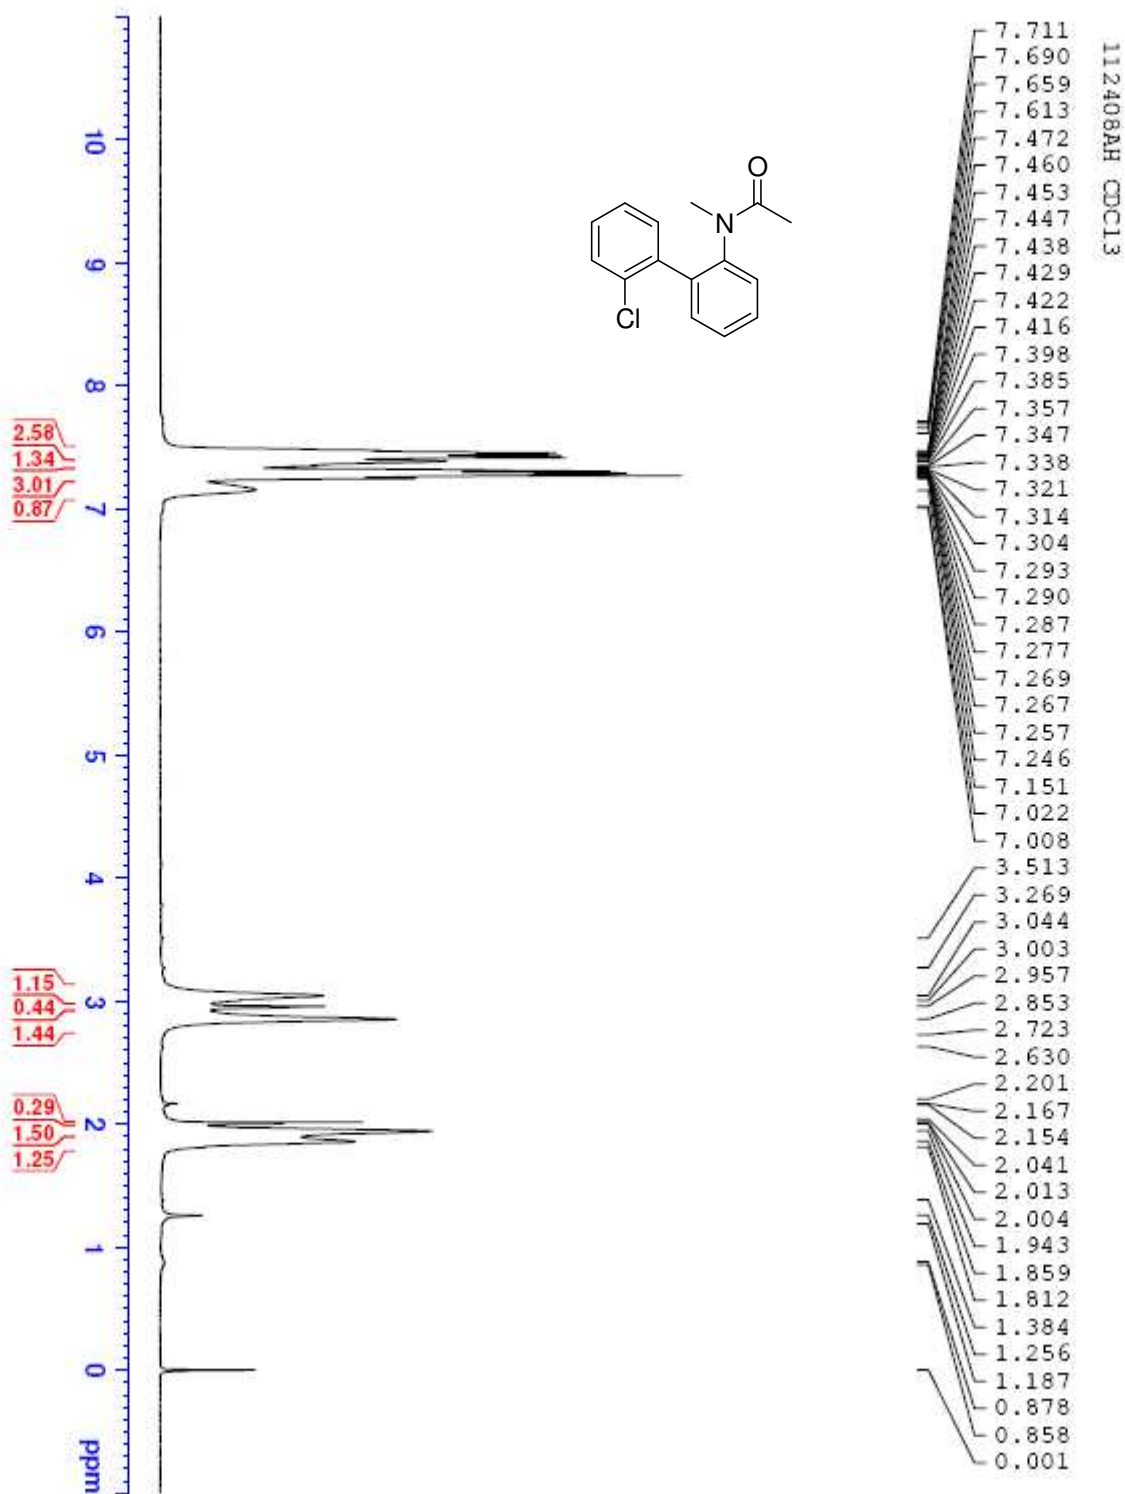



**[1,1'-Biphenyl]-2-(N-methyl-acetamide), 2'-chloro- (23).**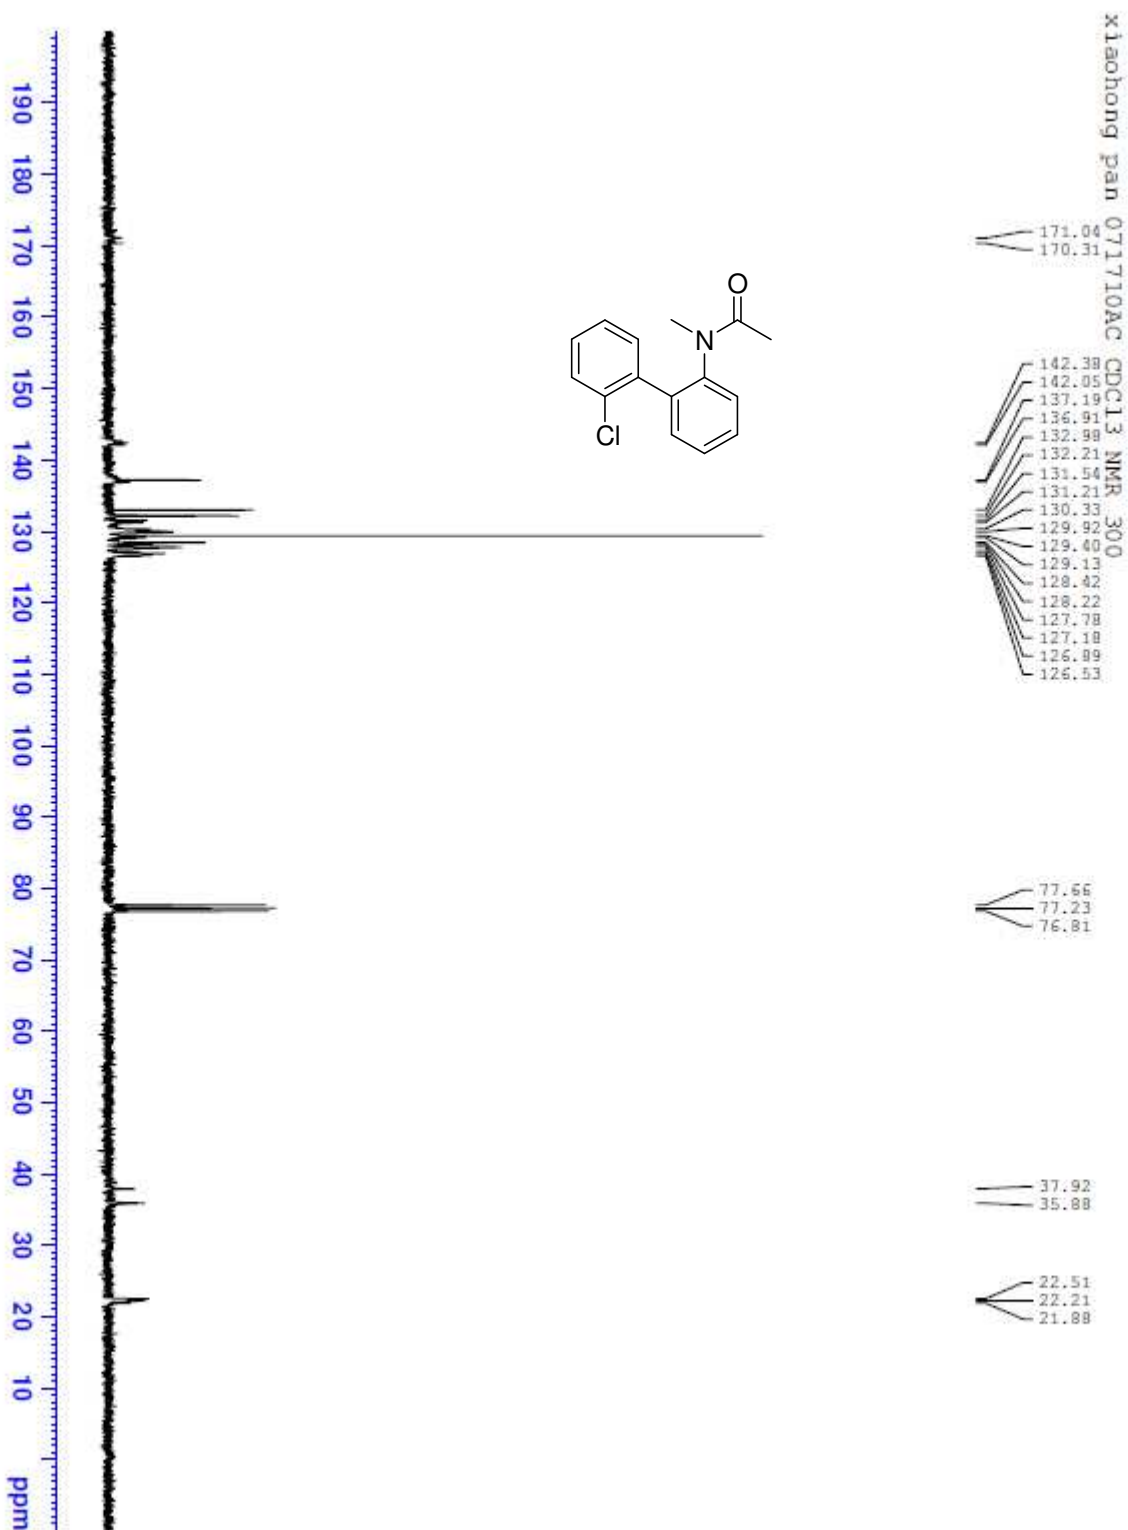

**5-Phenyl-N-methyl-dibenzazepin-6-one (24).**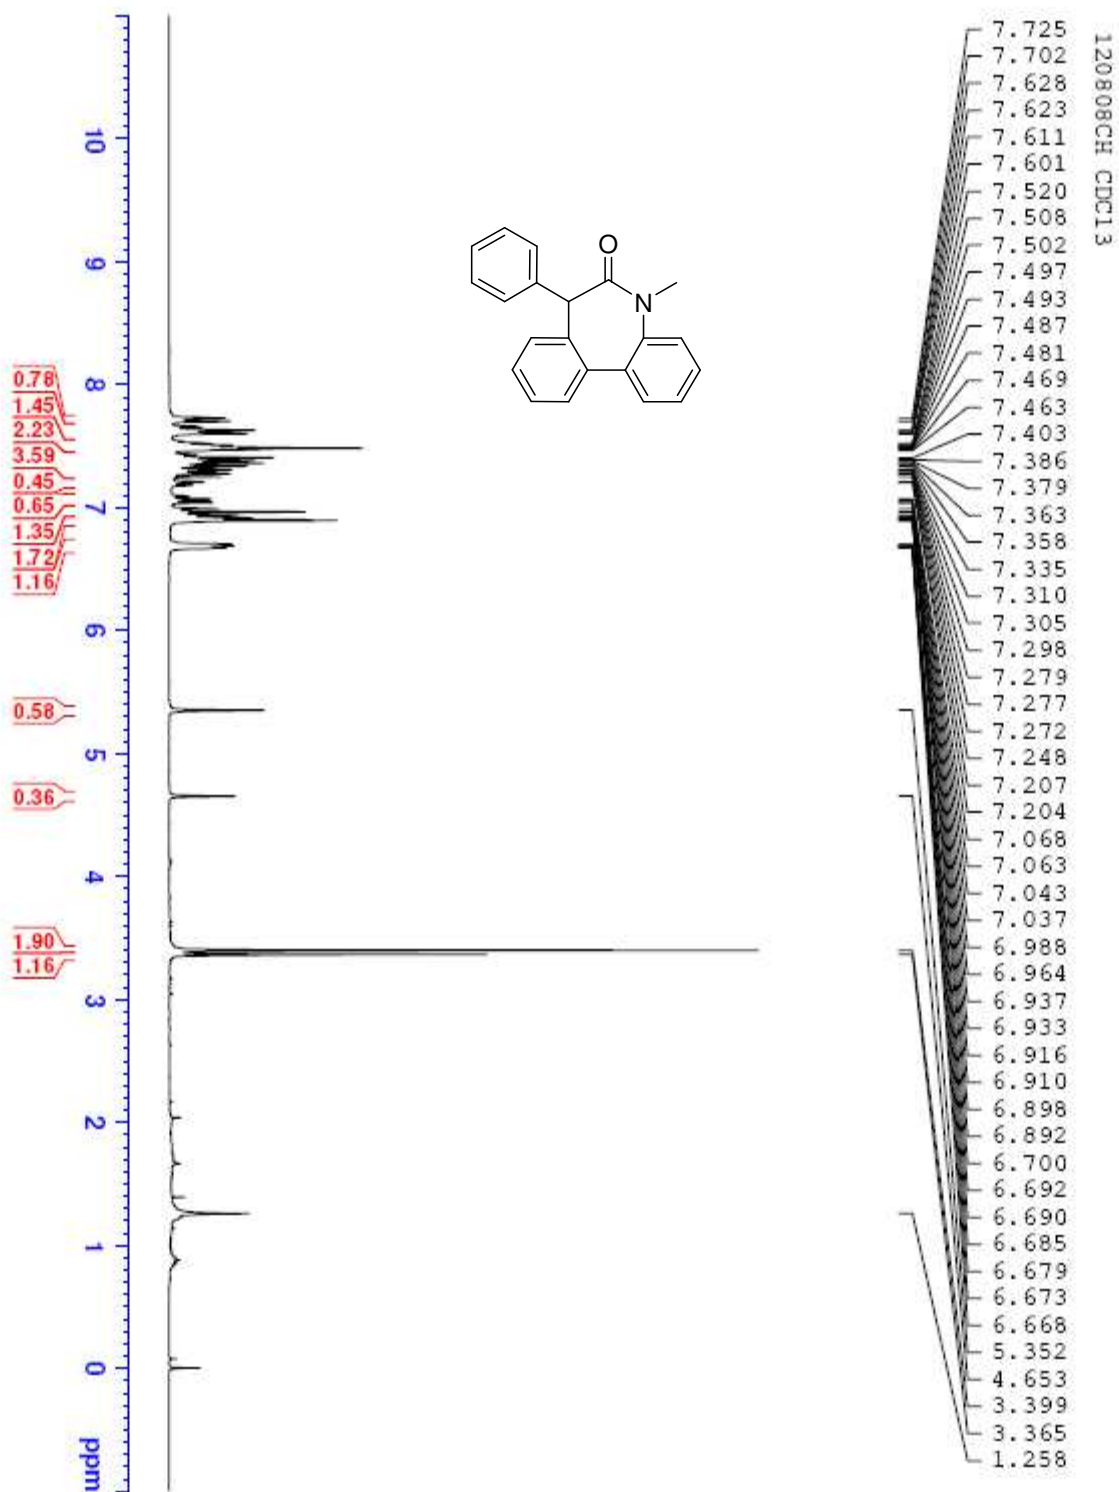

**5-Phenyl-N-methyl-dibenzazepin-6-one (24).**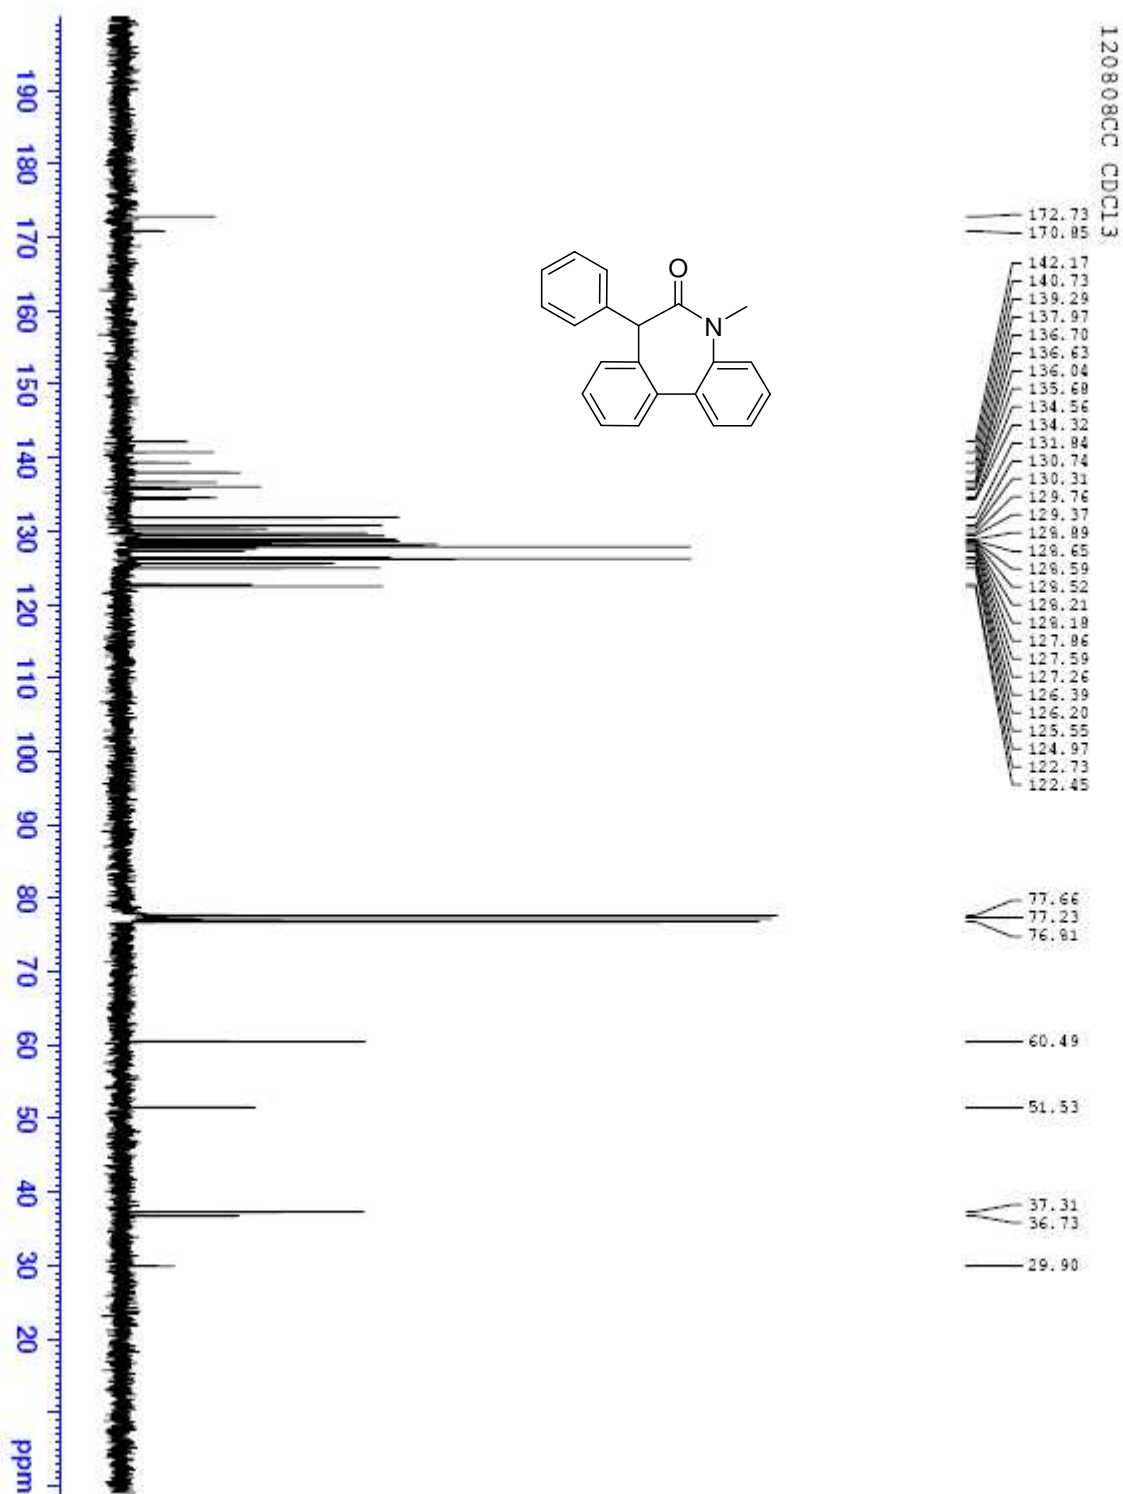

**5-Methoxy-*N*-methyl-dibenzazepin-6-one (26).**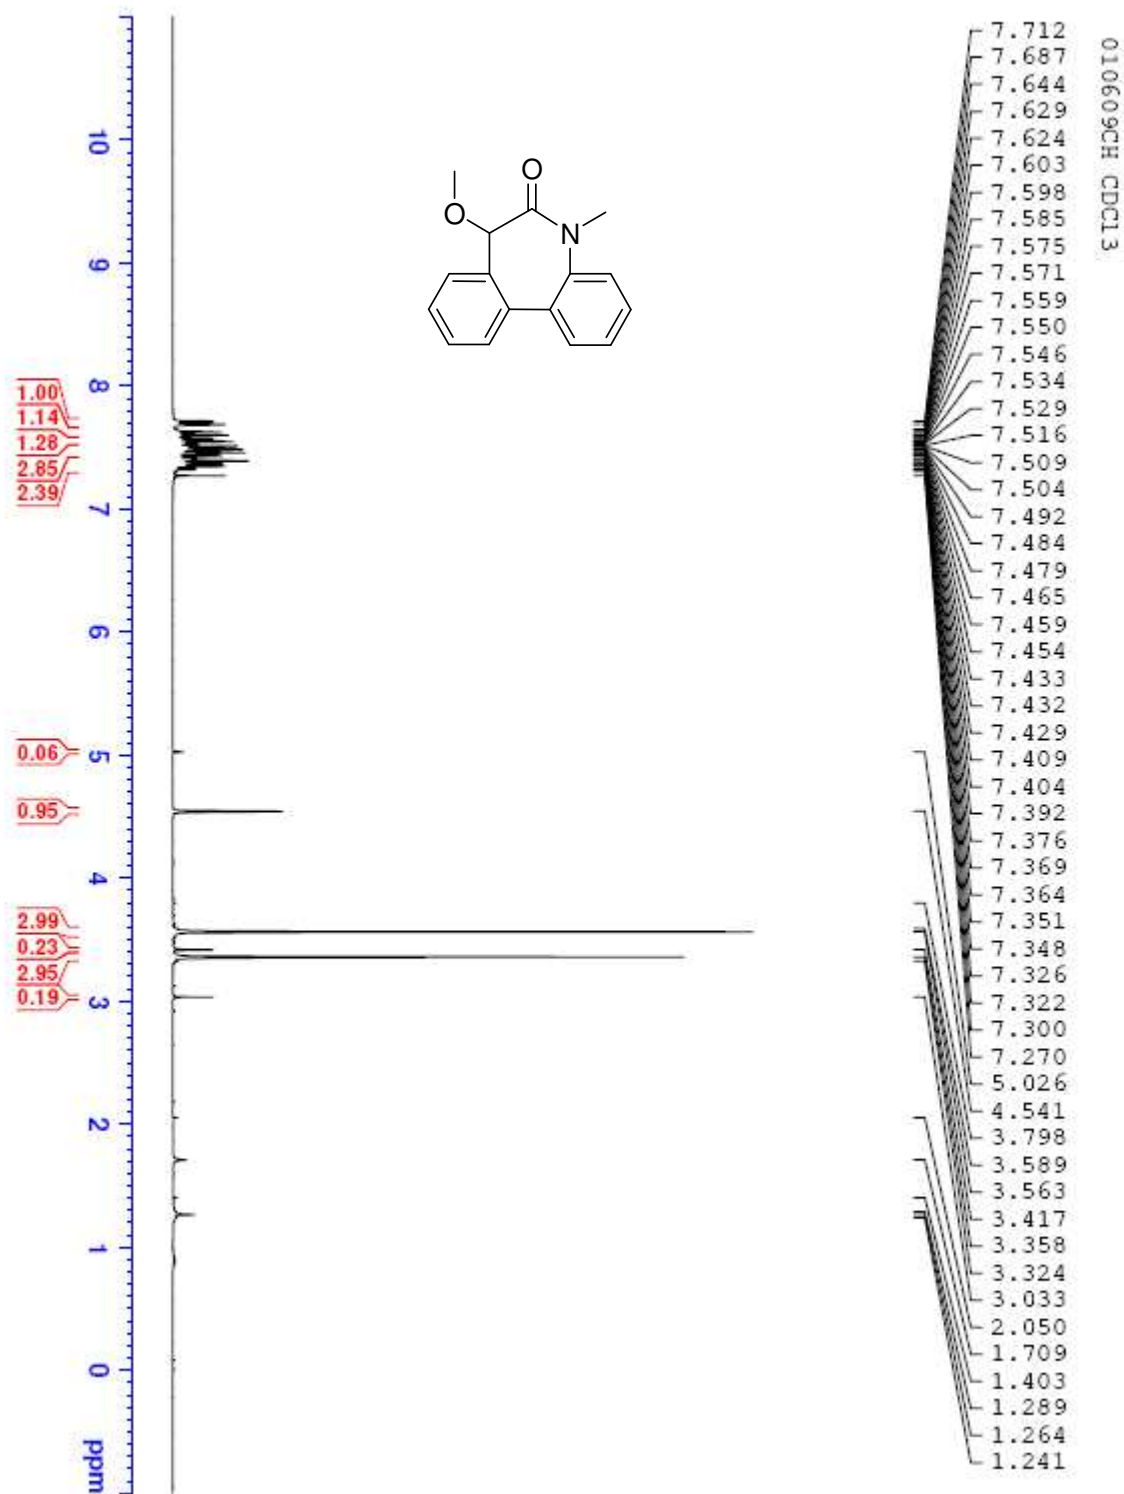

**5-Methoxy-*N*-methyl-dibenzazepin-6-one (26).**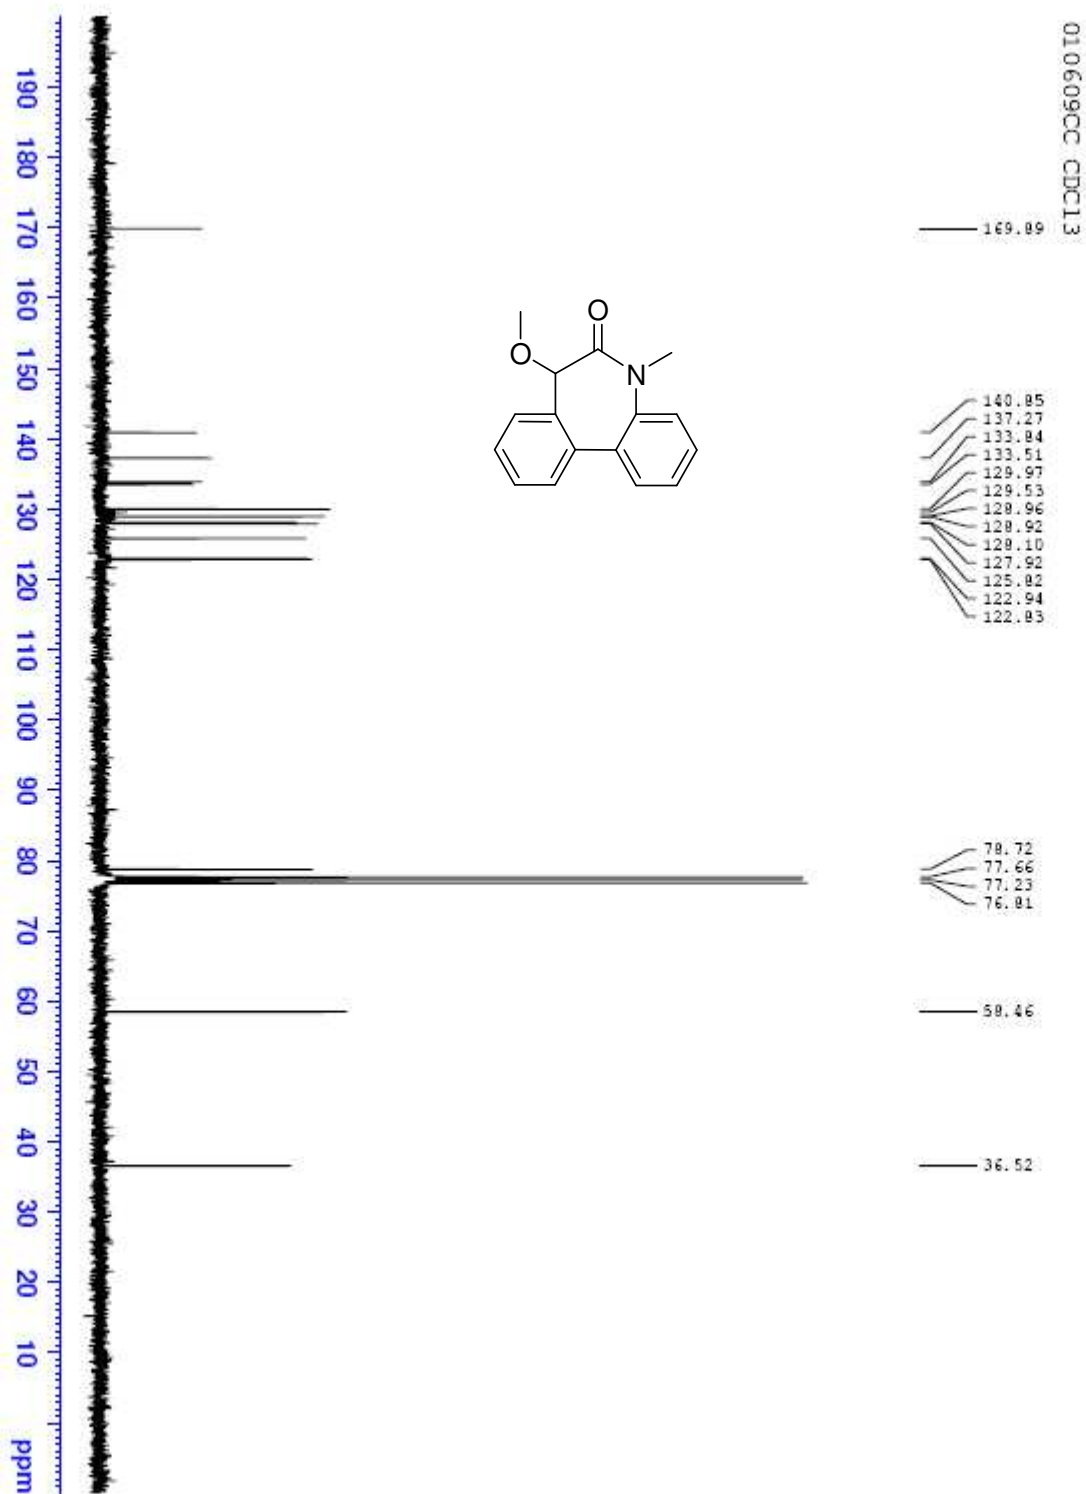

**5,5-Dimethyl-N-methyl-dibenzazepin-6-one (27).**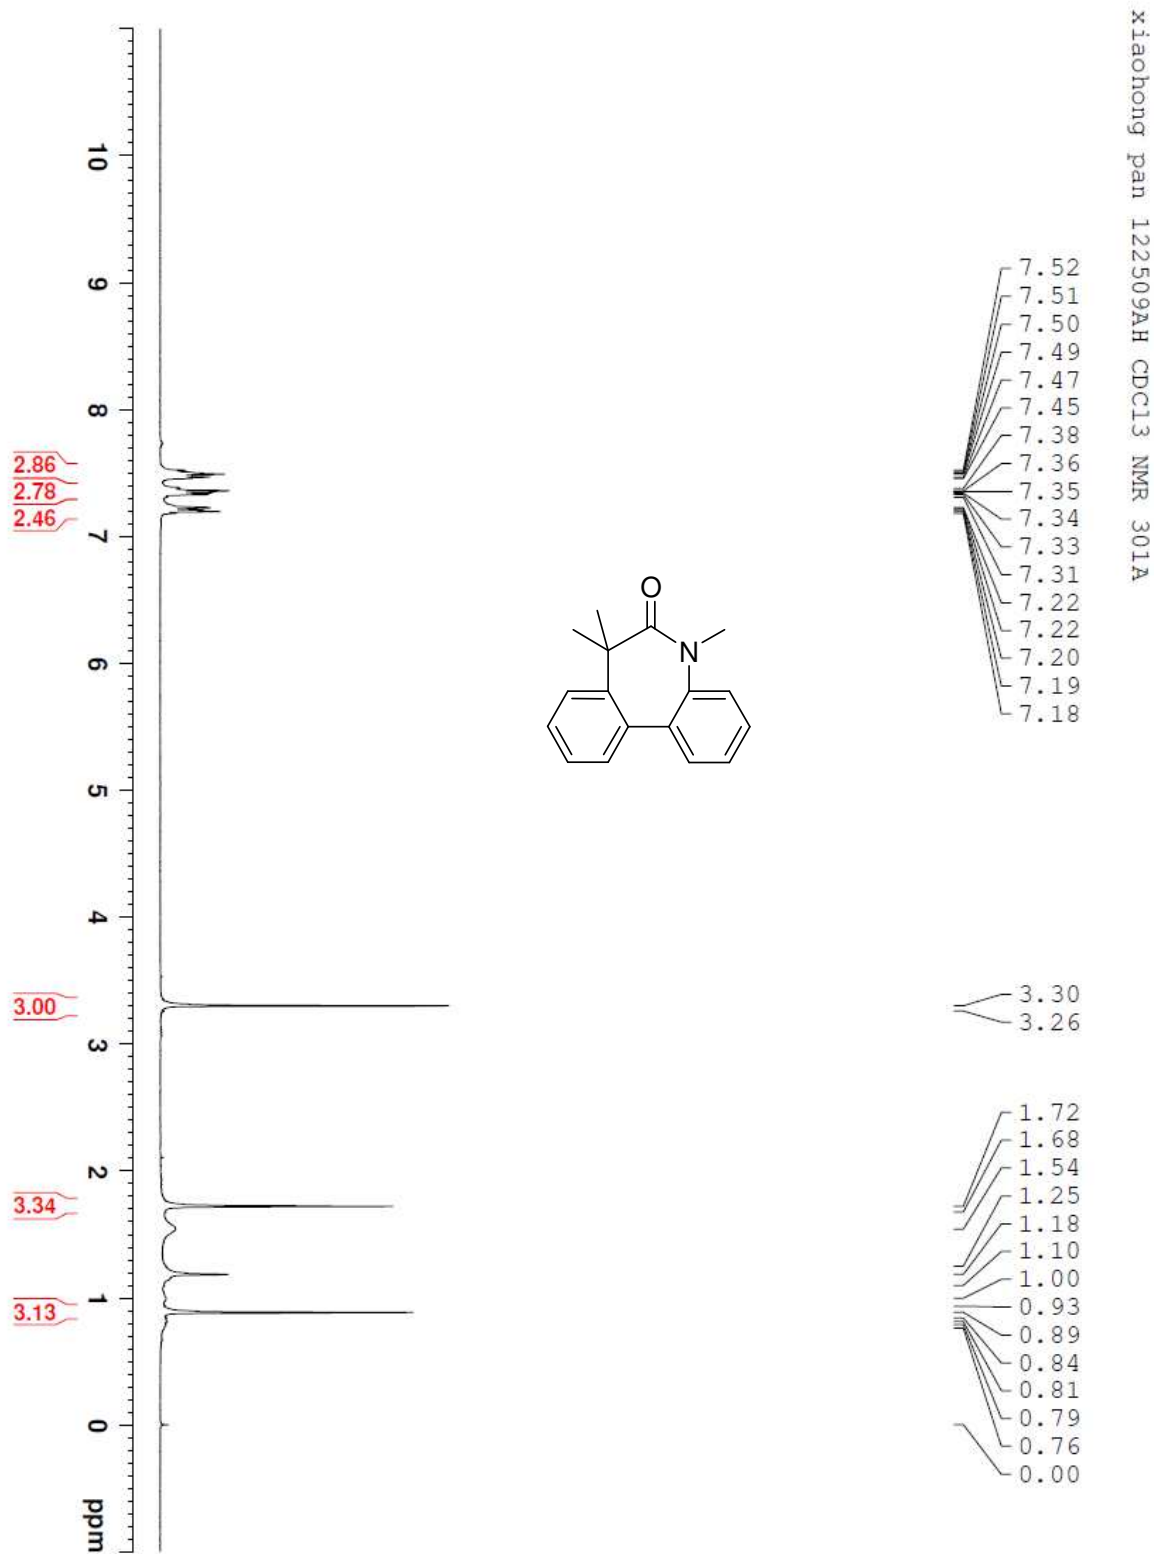

**5,5-Dimethyl-*N*-methyl-dibenzazepin-6-one (27).**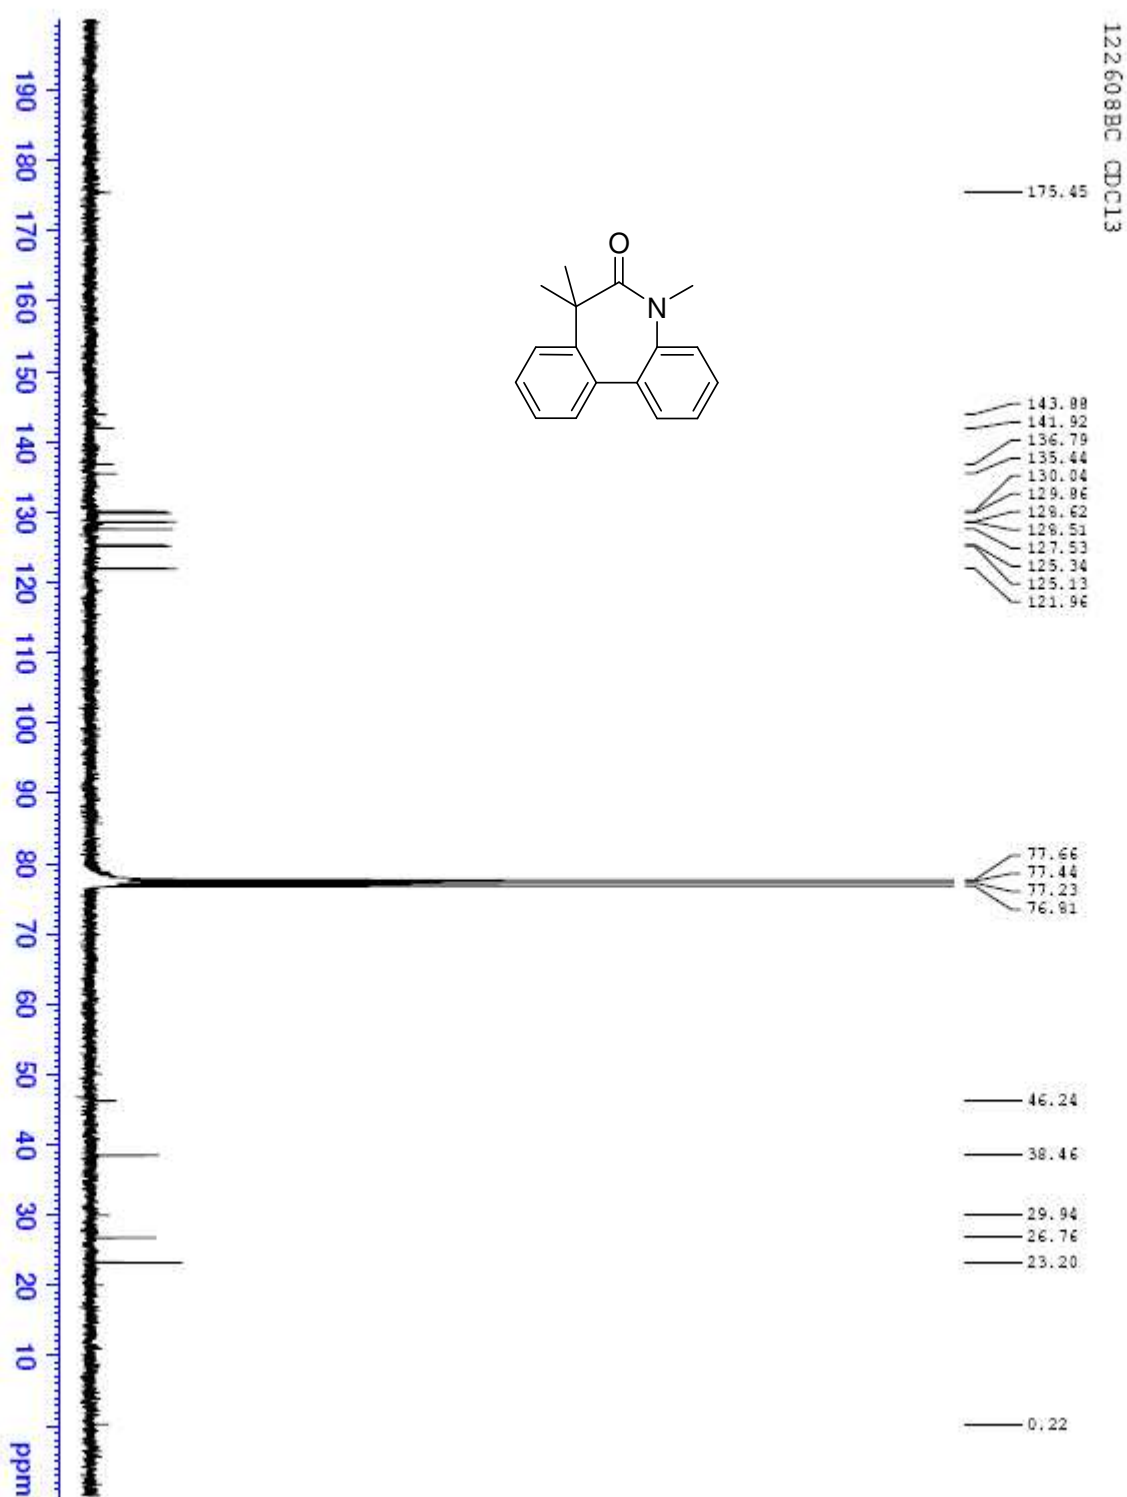

121206CH CDCl<sub>3</sub>

Chemical structure: O=C1Cc2ccccc2N(Cc3ccccc3)c4ccccc14

Integration values (left): 1.95, 2.82, 1.77, 1.28, 2.71, 1.76, 0.99, 1.00, 1.02, 1.00

Chemical shifts (right): 7.515, 7.513, 7.502, 7.500, 7.492, 7.487, 7.472, 7.455, 7.436, 7.419, 7.408, 7.379, 7.357, 7.351, 7.331, 7.325, 7.303, 7.298, 7.288, 7.277, 7.271, 7.261, 7.254, 7.244, 7.236, 7.230, 7.213, 7.207, 7.171, 7.156, 7.150, 7.125, 7.111, 7.103, 7.090, 7.070, 6.908, 6.896, 6.884, 6.877, 5.191, 5.169, 5.139, 4.939, 4.887, 3.675, 3.634, 3.601, 3.553, 3.512, 1.963, 1.736, 1.256, 0.001

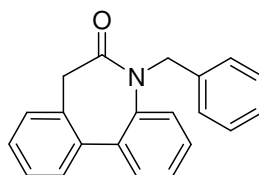



***N*-Benzyl-dibenzazepin-6-one (28).**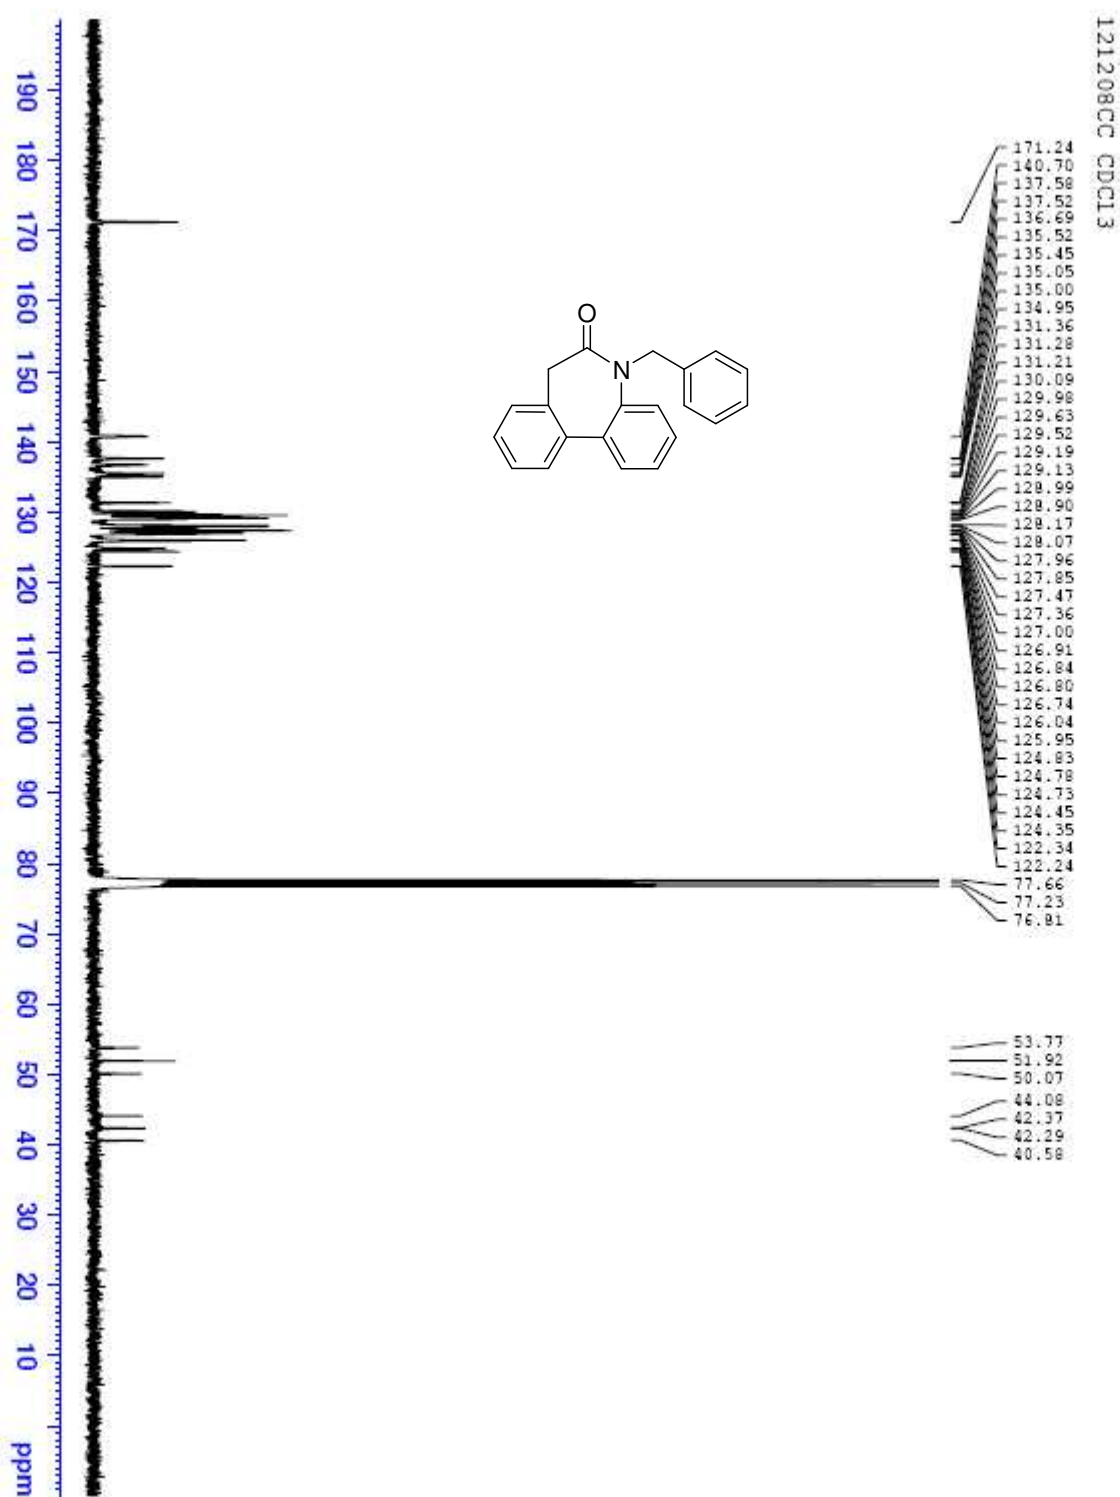

**5-Benzyloxy-N-methyl-dibenzazepin-6-one (29).**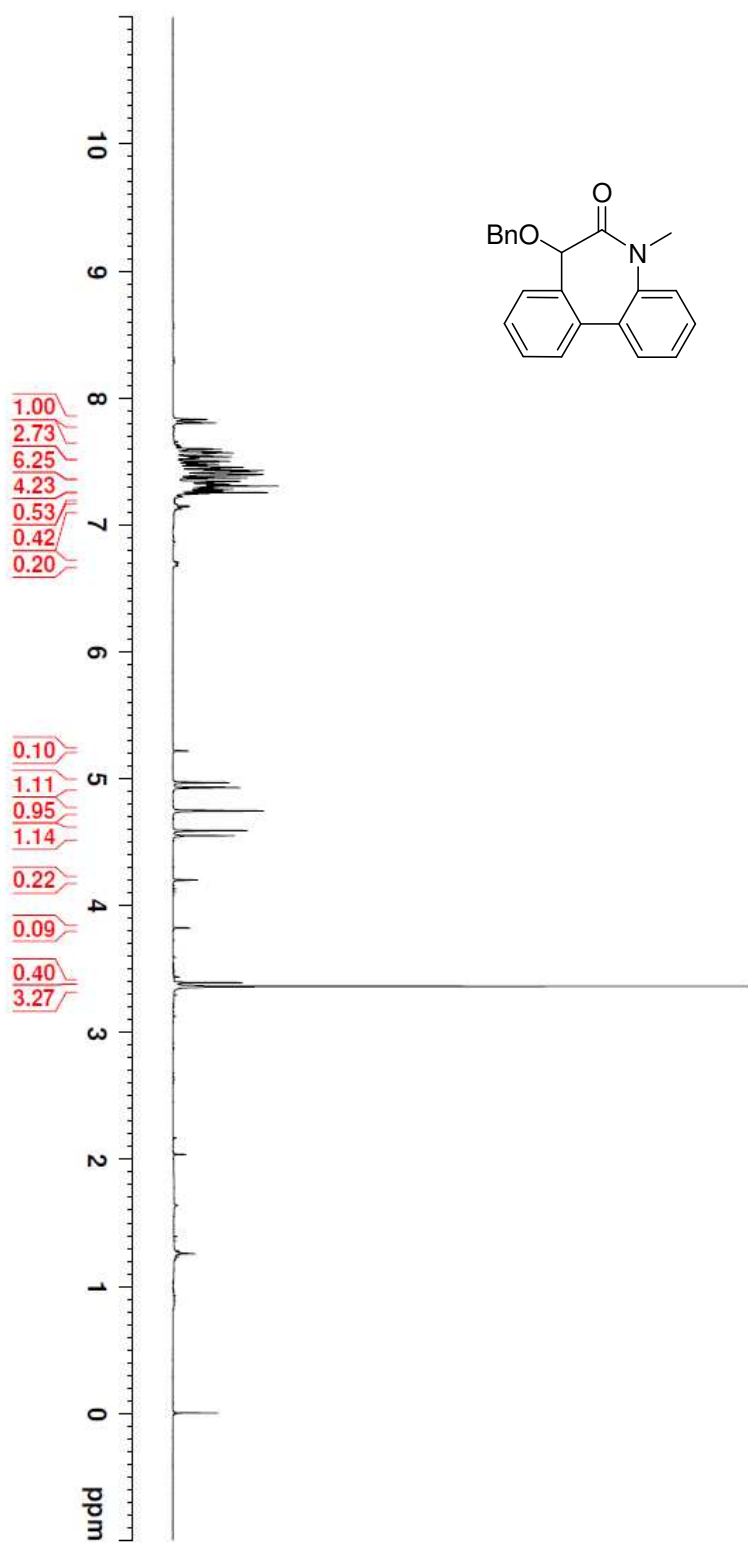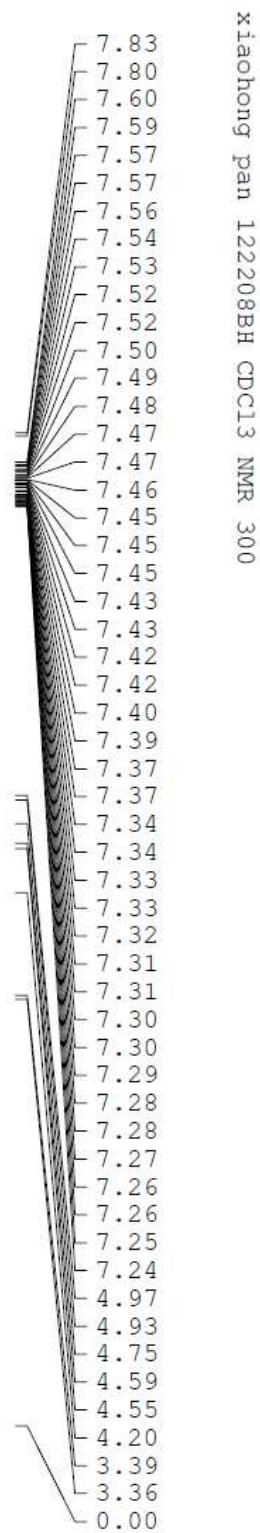

**5-Benzyloxy-N-methyl-dibenzazepin-6-one (29).**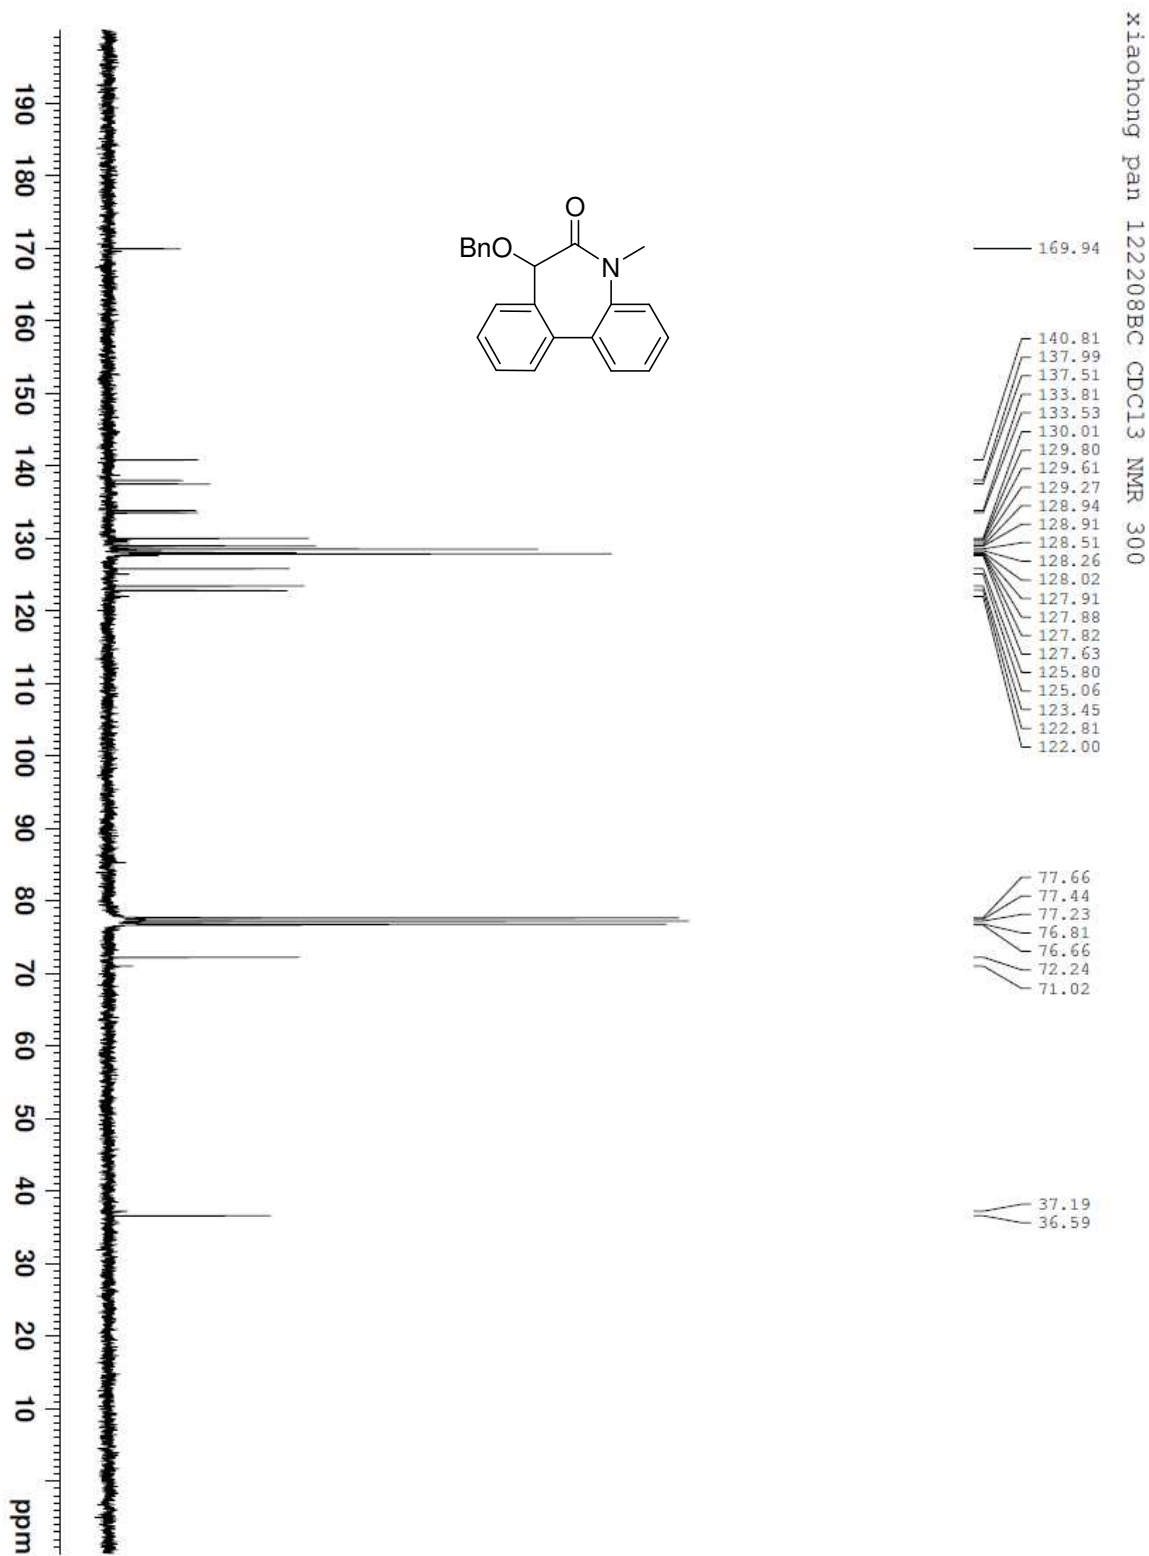

**5-Benzyl-5-hydroxy-*N*-methyl-dibenzazepin-6-one (30).**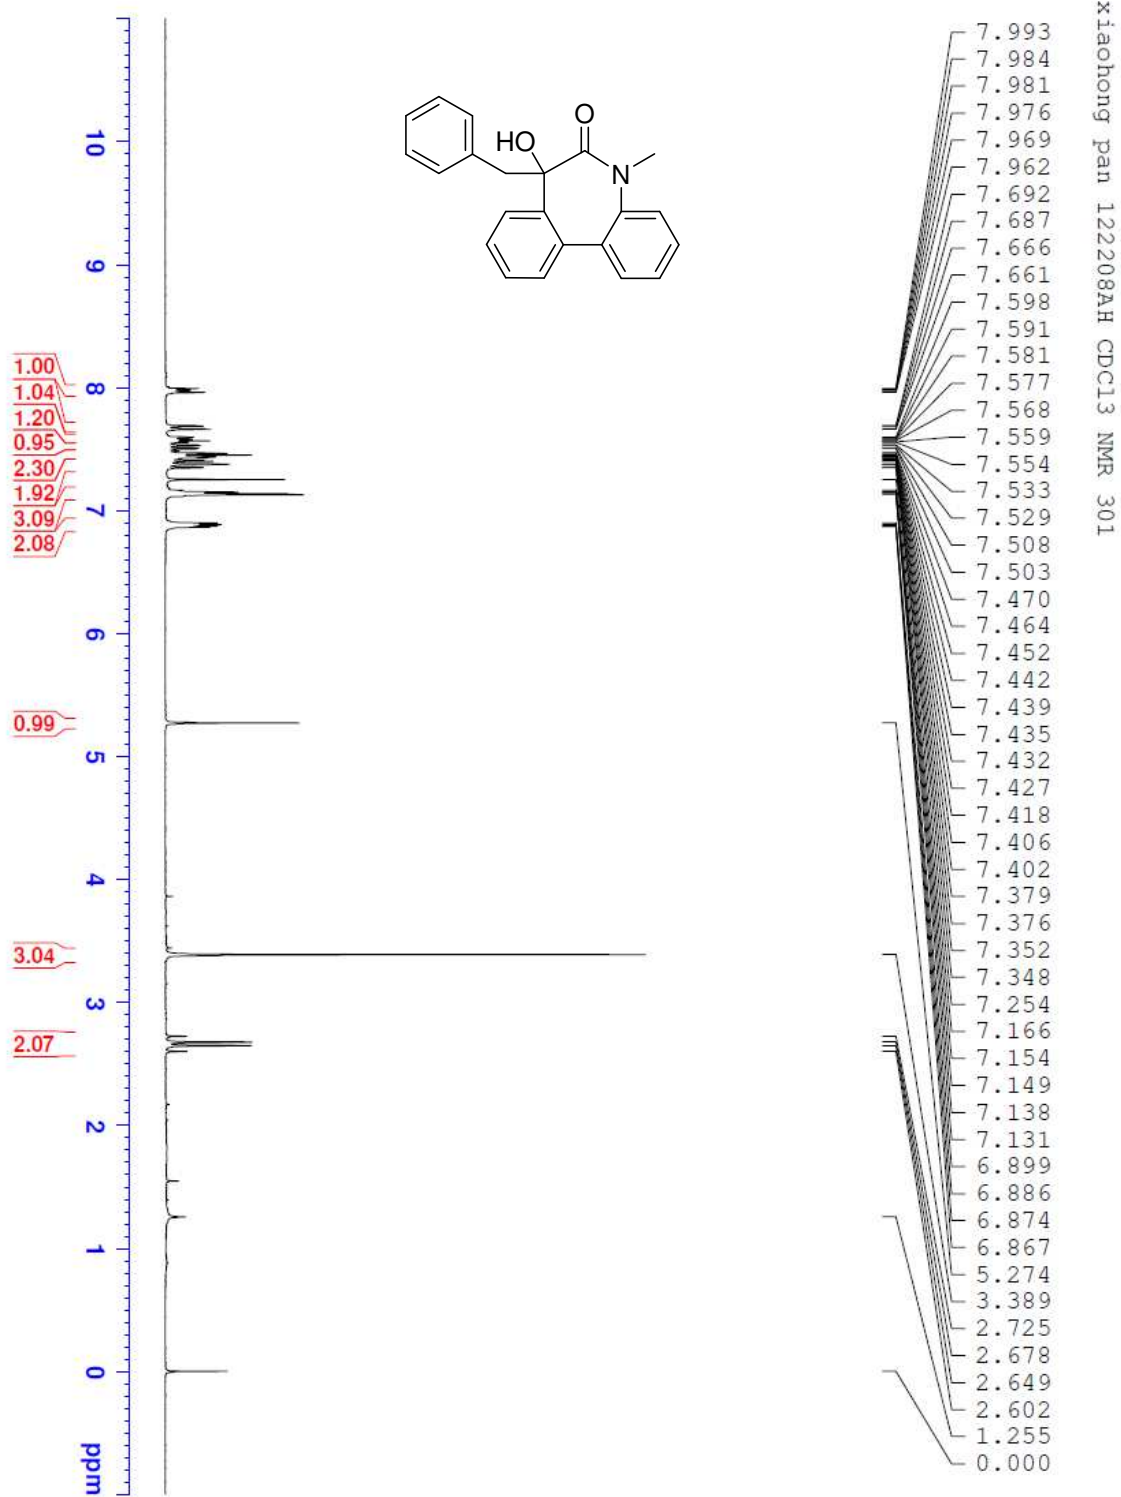

**5-Benzyl-5-hydroxy-*N*-methyl-dibenzazepin-6-one (30).**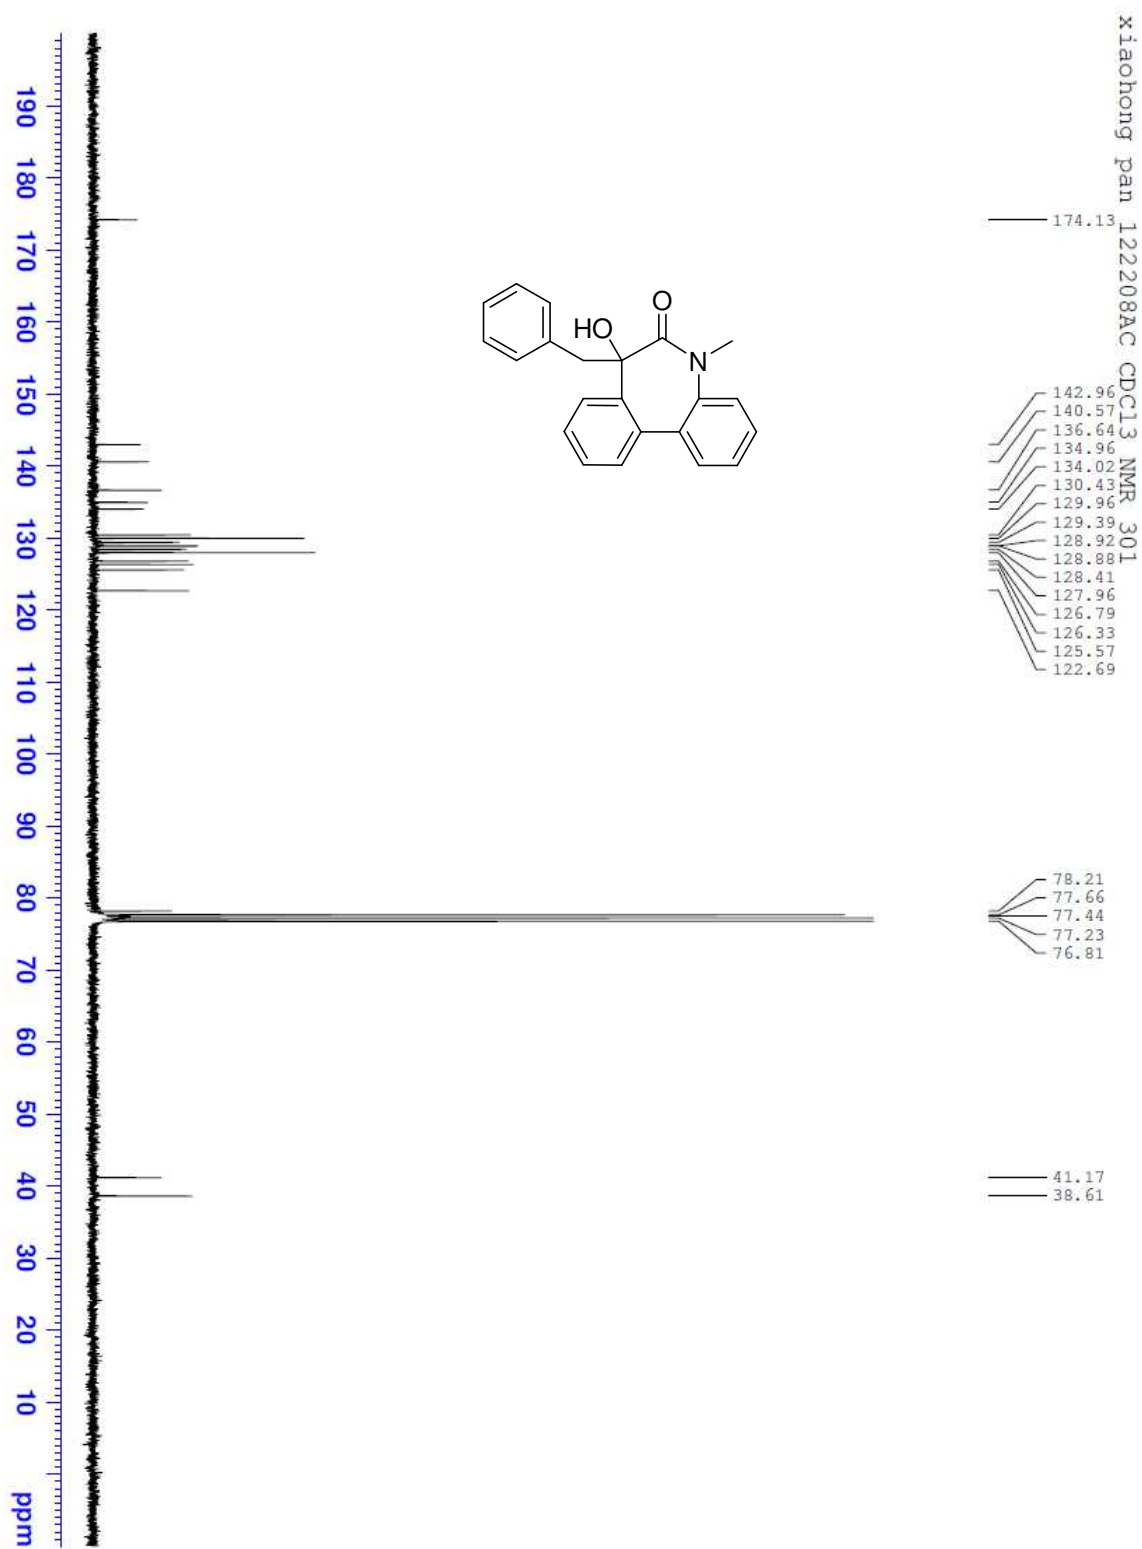

**5-Benzyloxy-N-methyl-dihydrodibenzazepine (31).**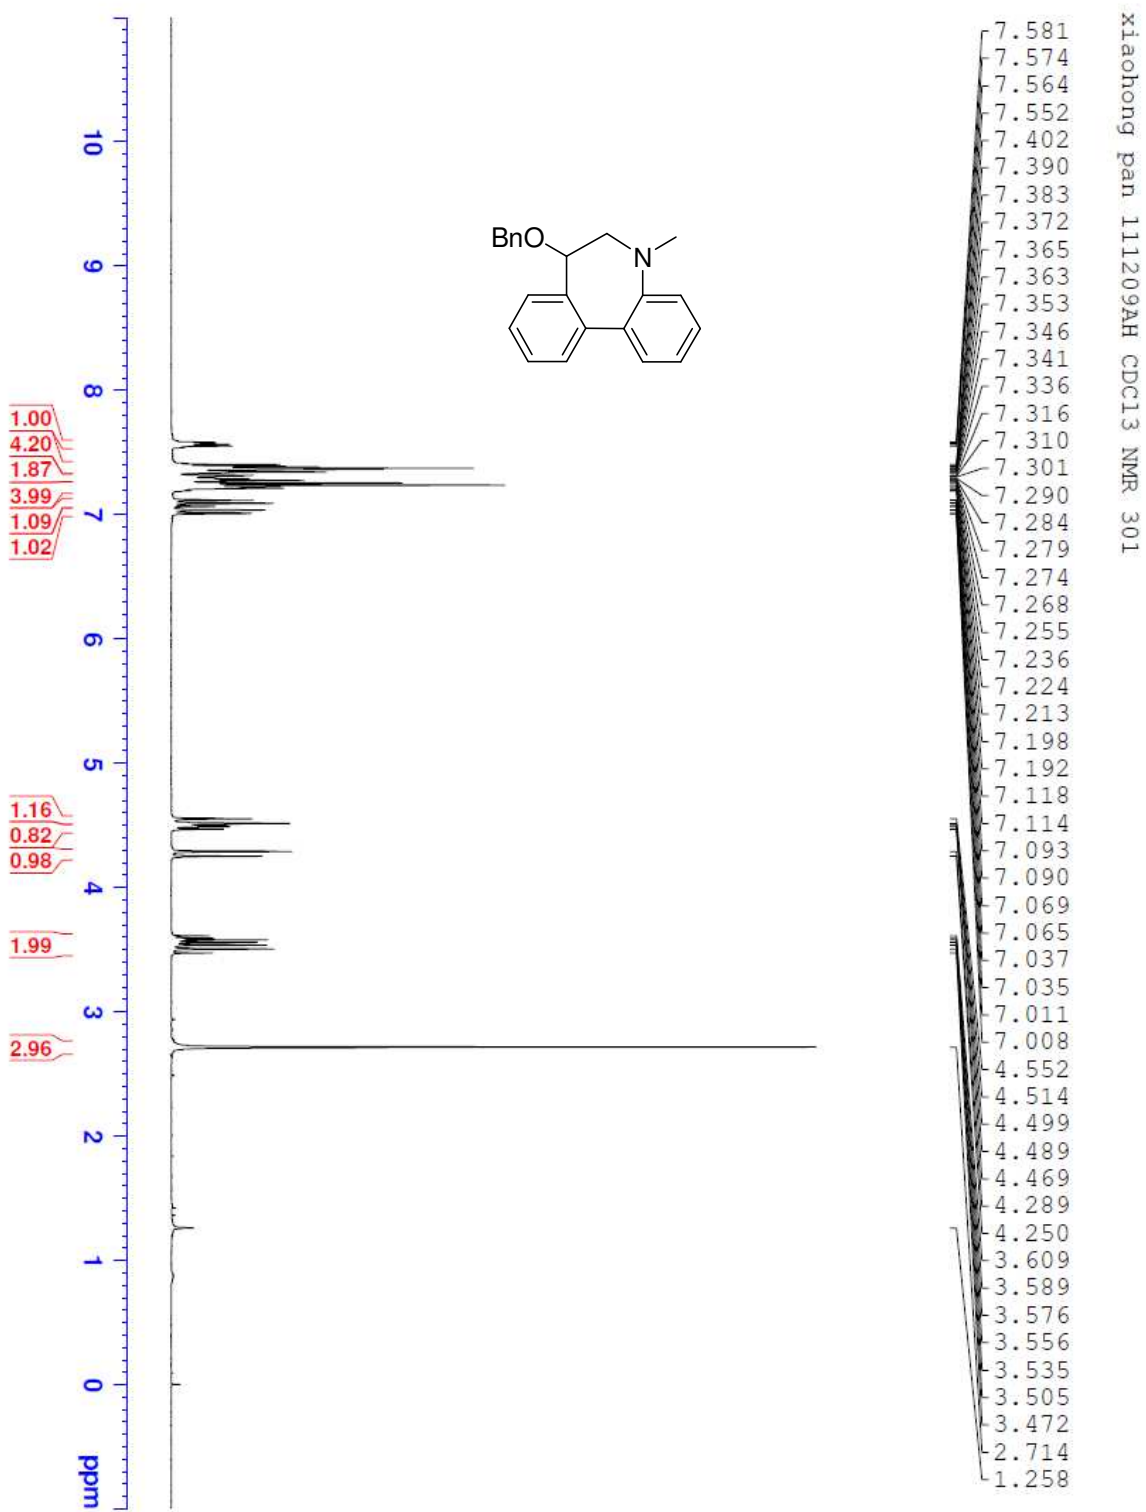

**5-Benzyloxy-*N*-methyl-dihydrodibenzazepine (31).**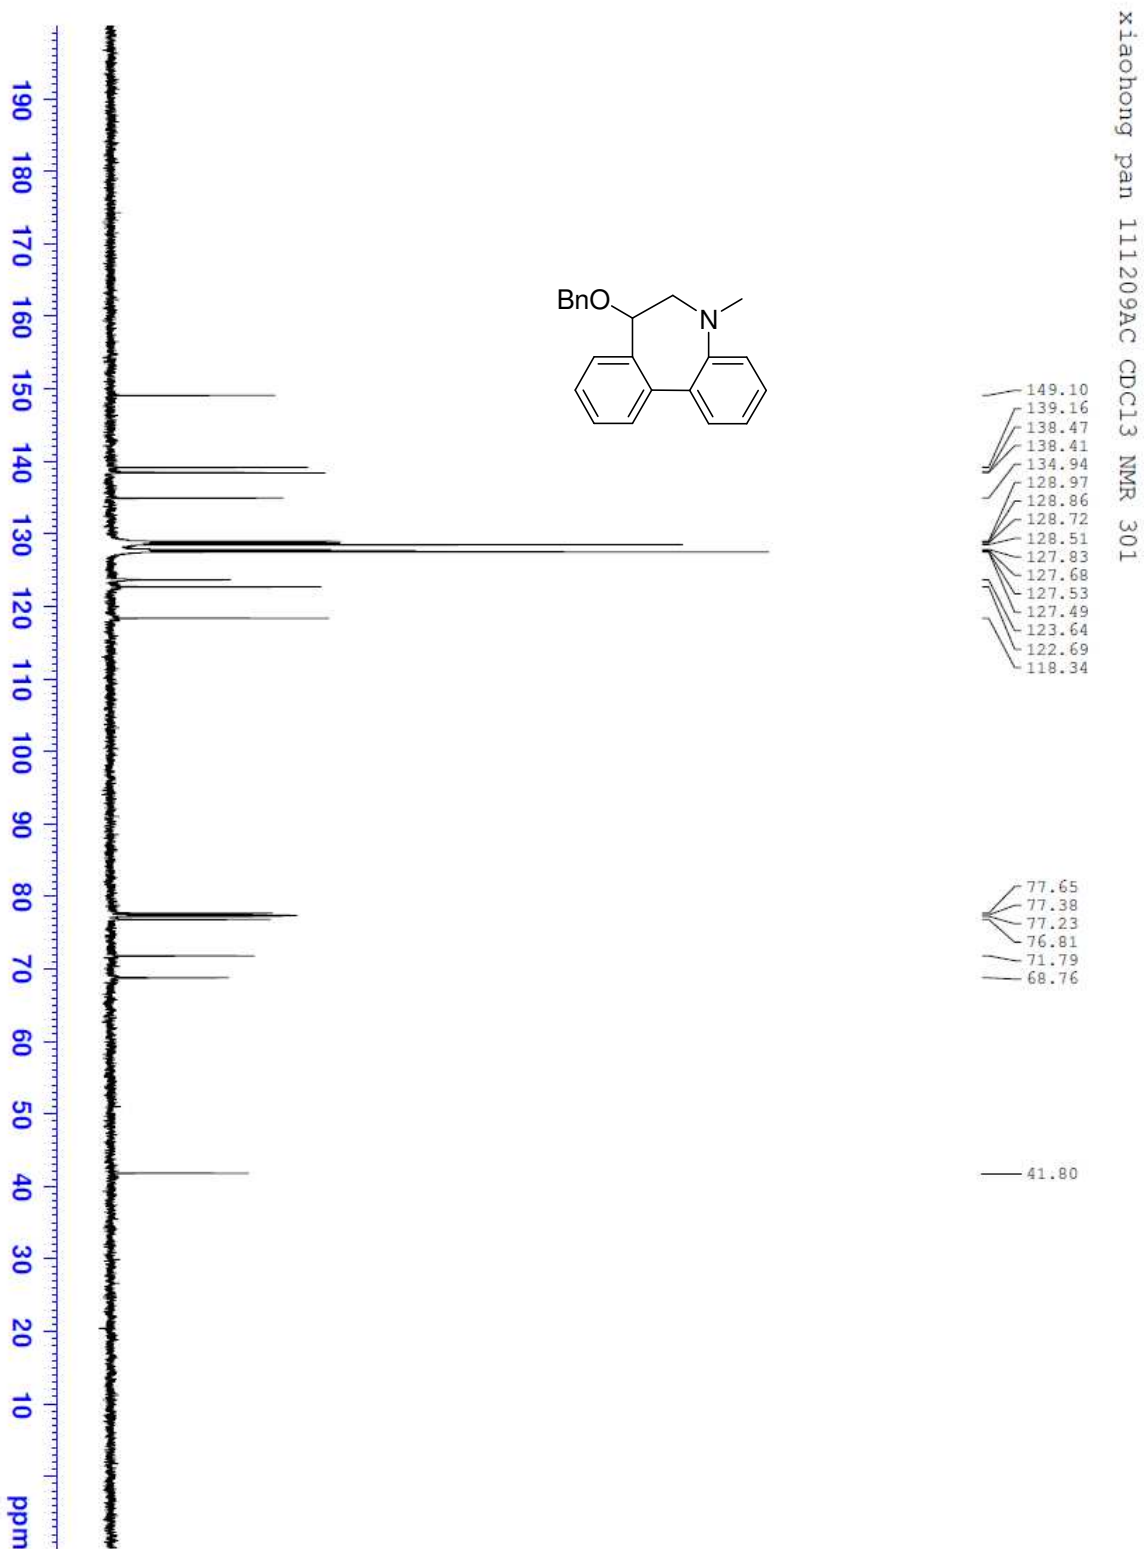



**5-Hydroxy-*N*-methyl-dihydrodibenzazepine (32).**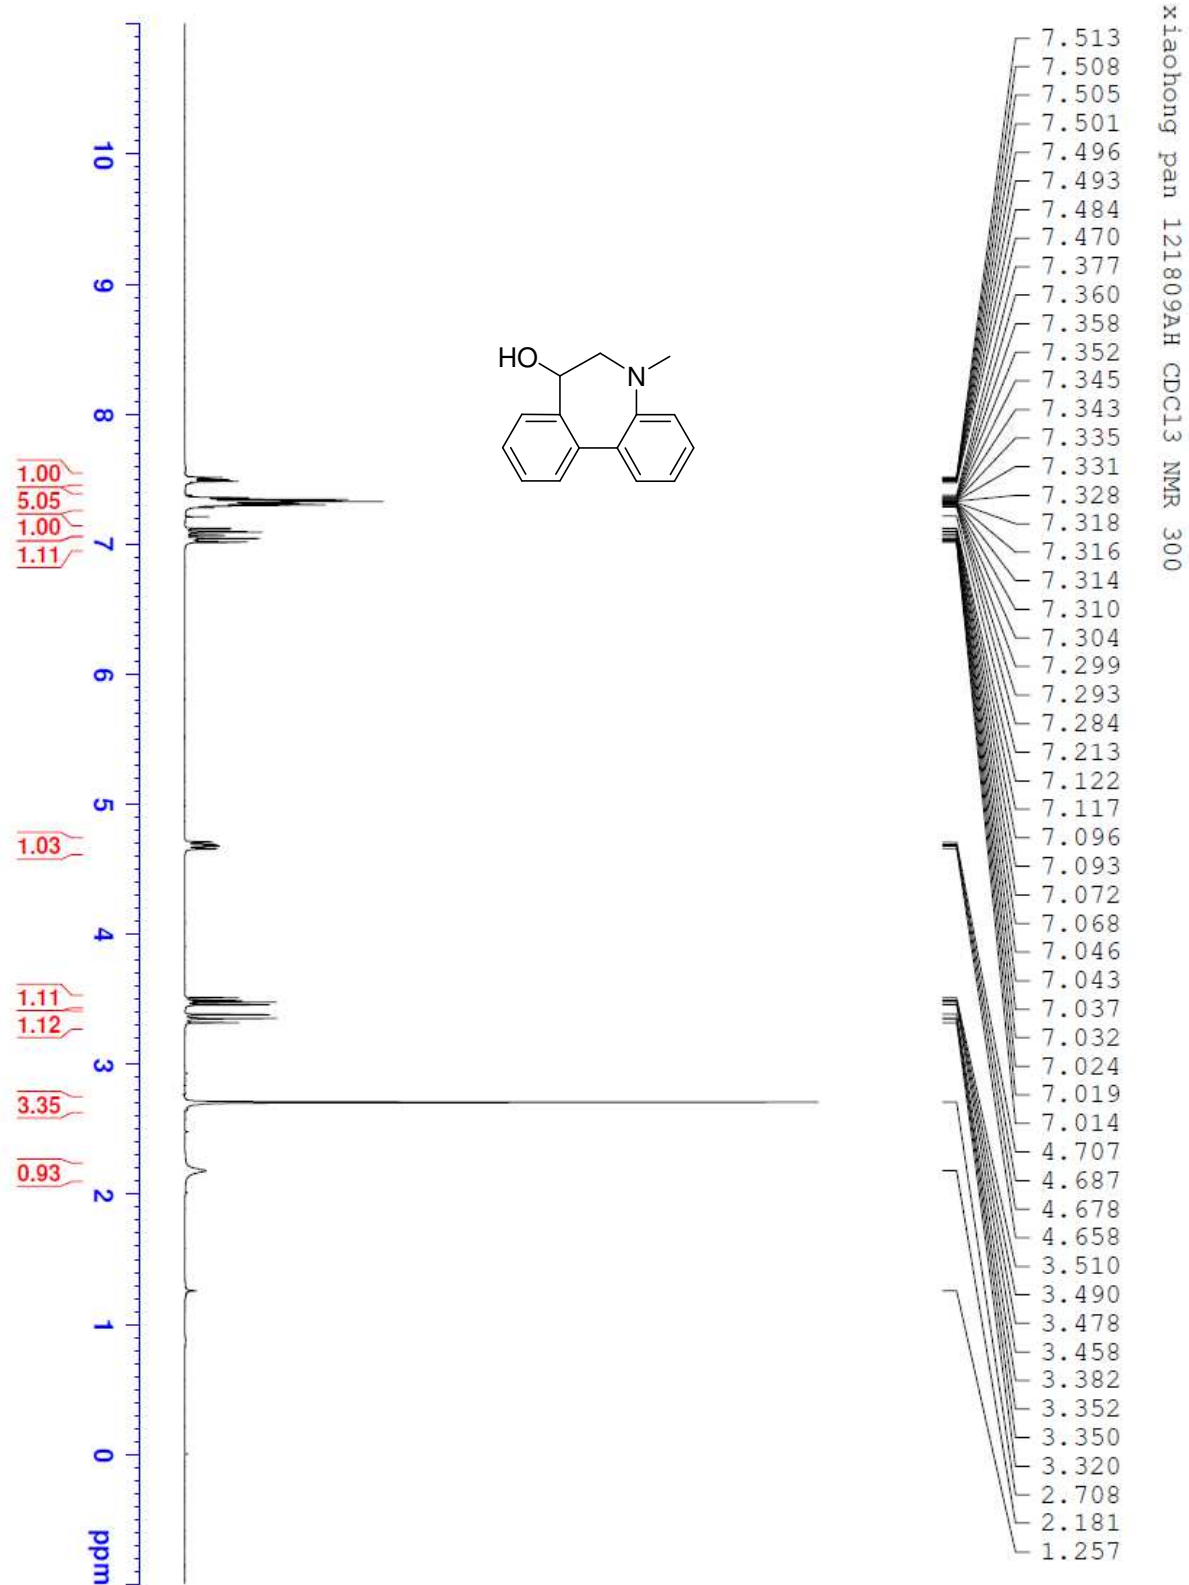



**5-Hydroxy-*N*-methyl-dihydrodibenzazepine (32).**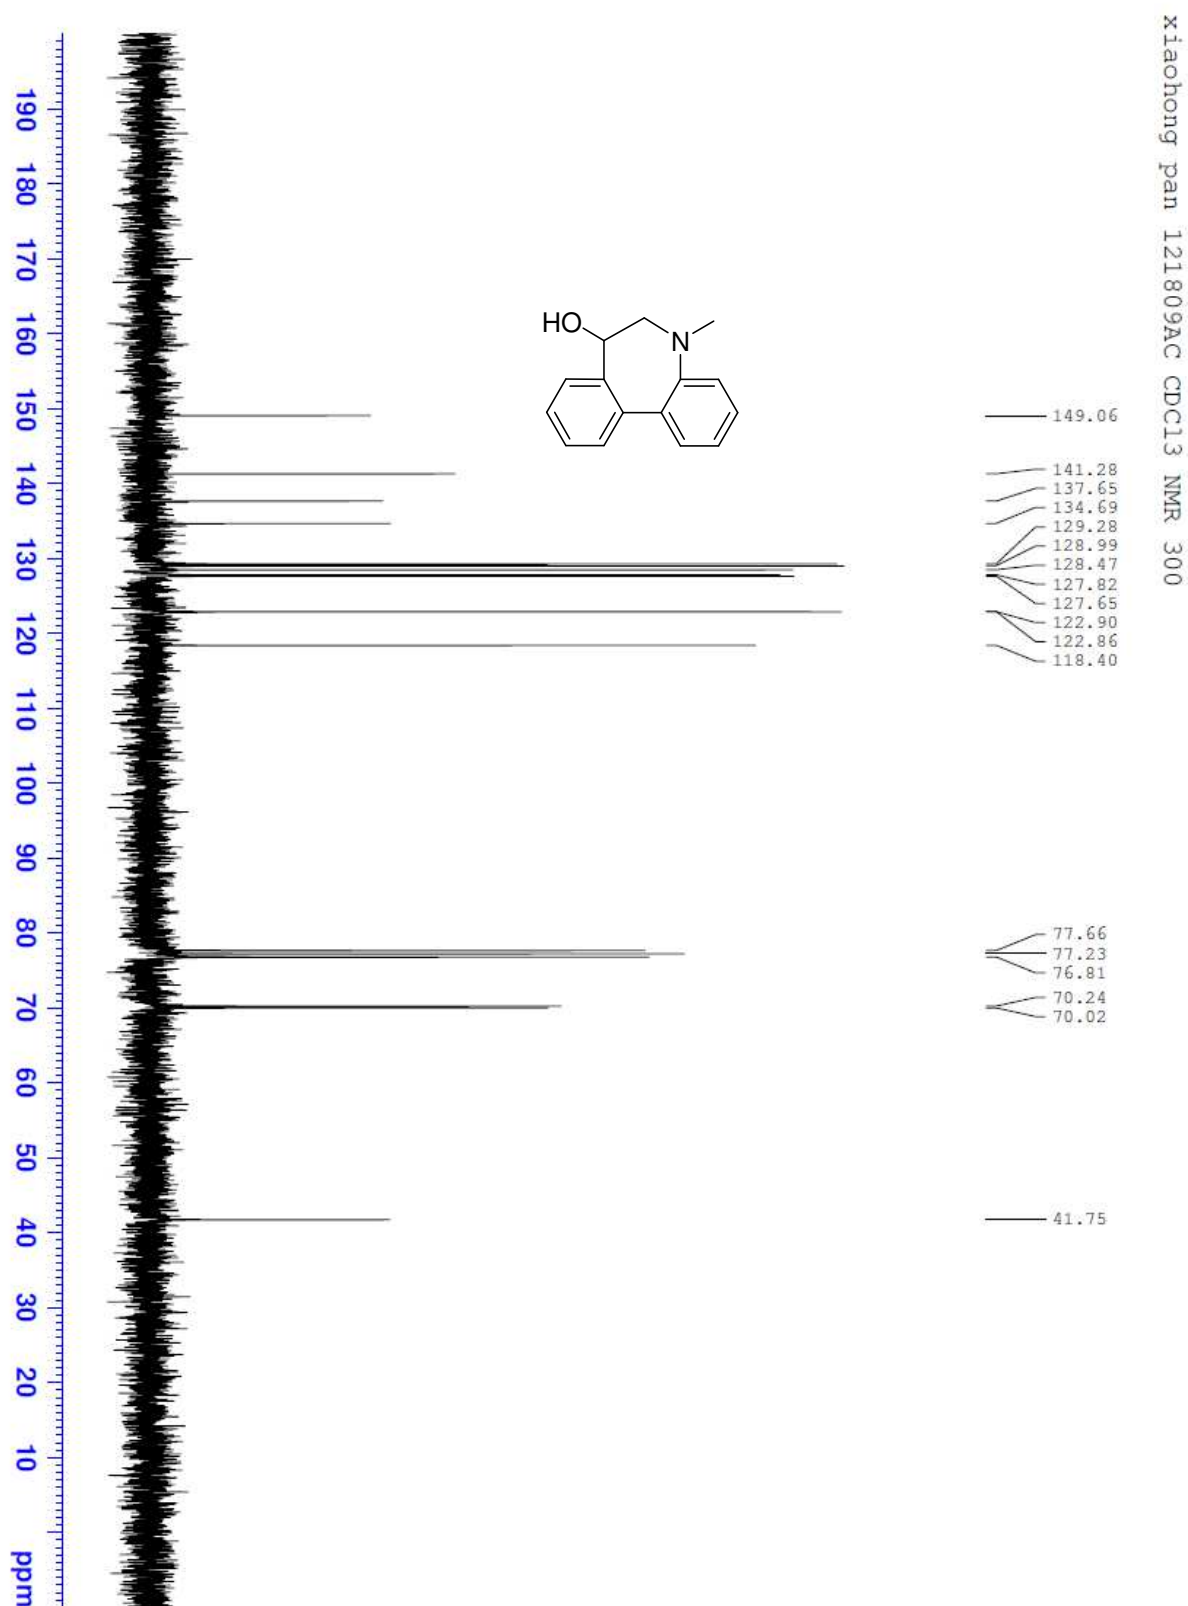

***N*-Methyl-dibenzazepin-5-one (33).**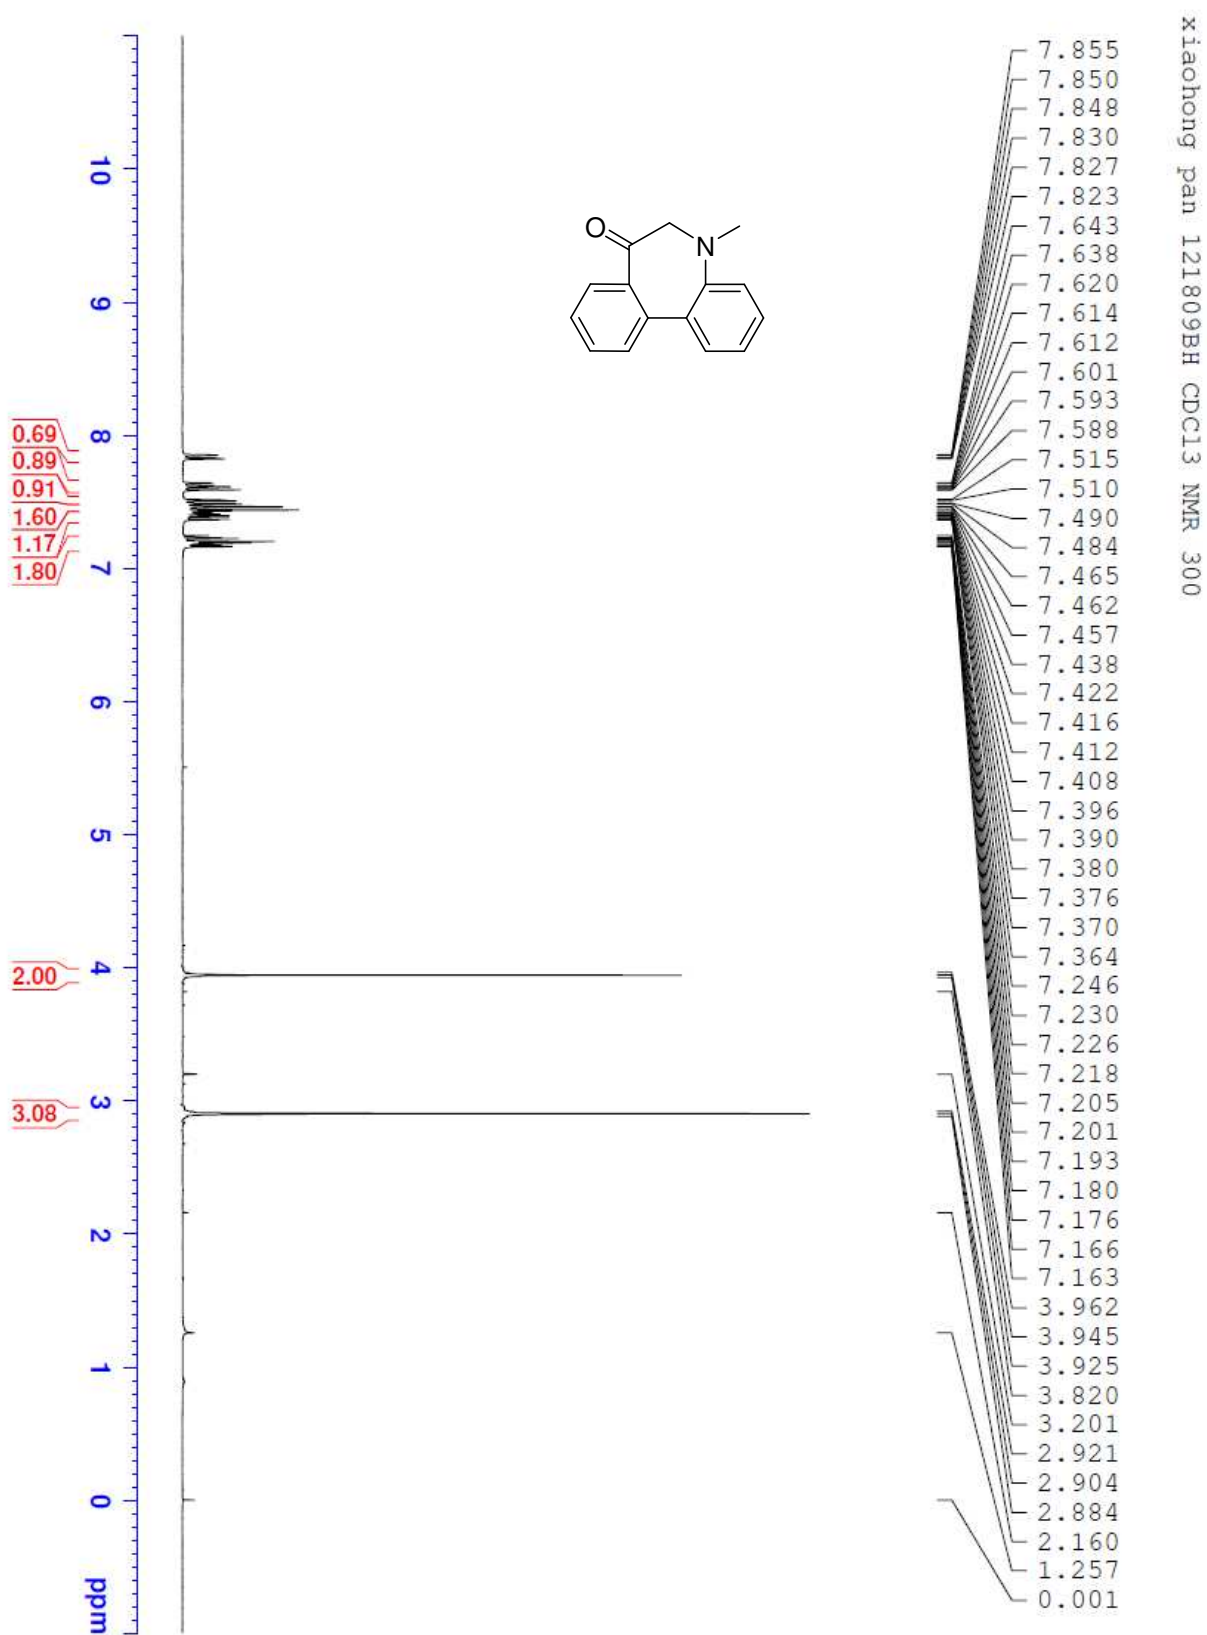

**N-Methyl-dibenzazepin-5-one (33).**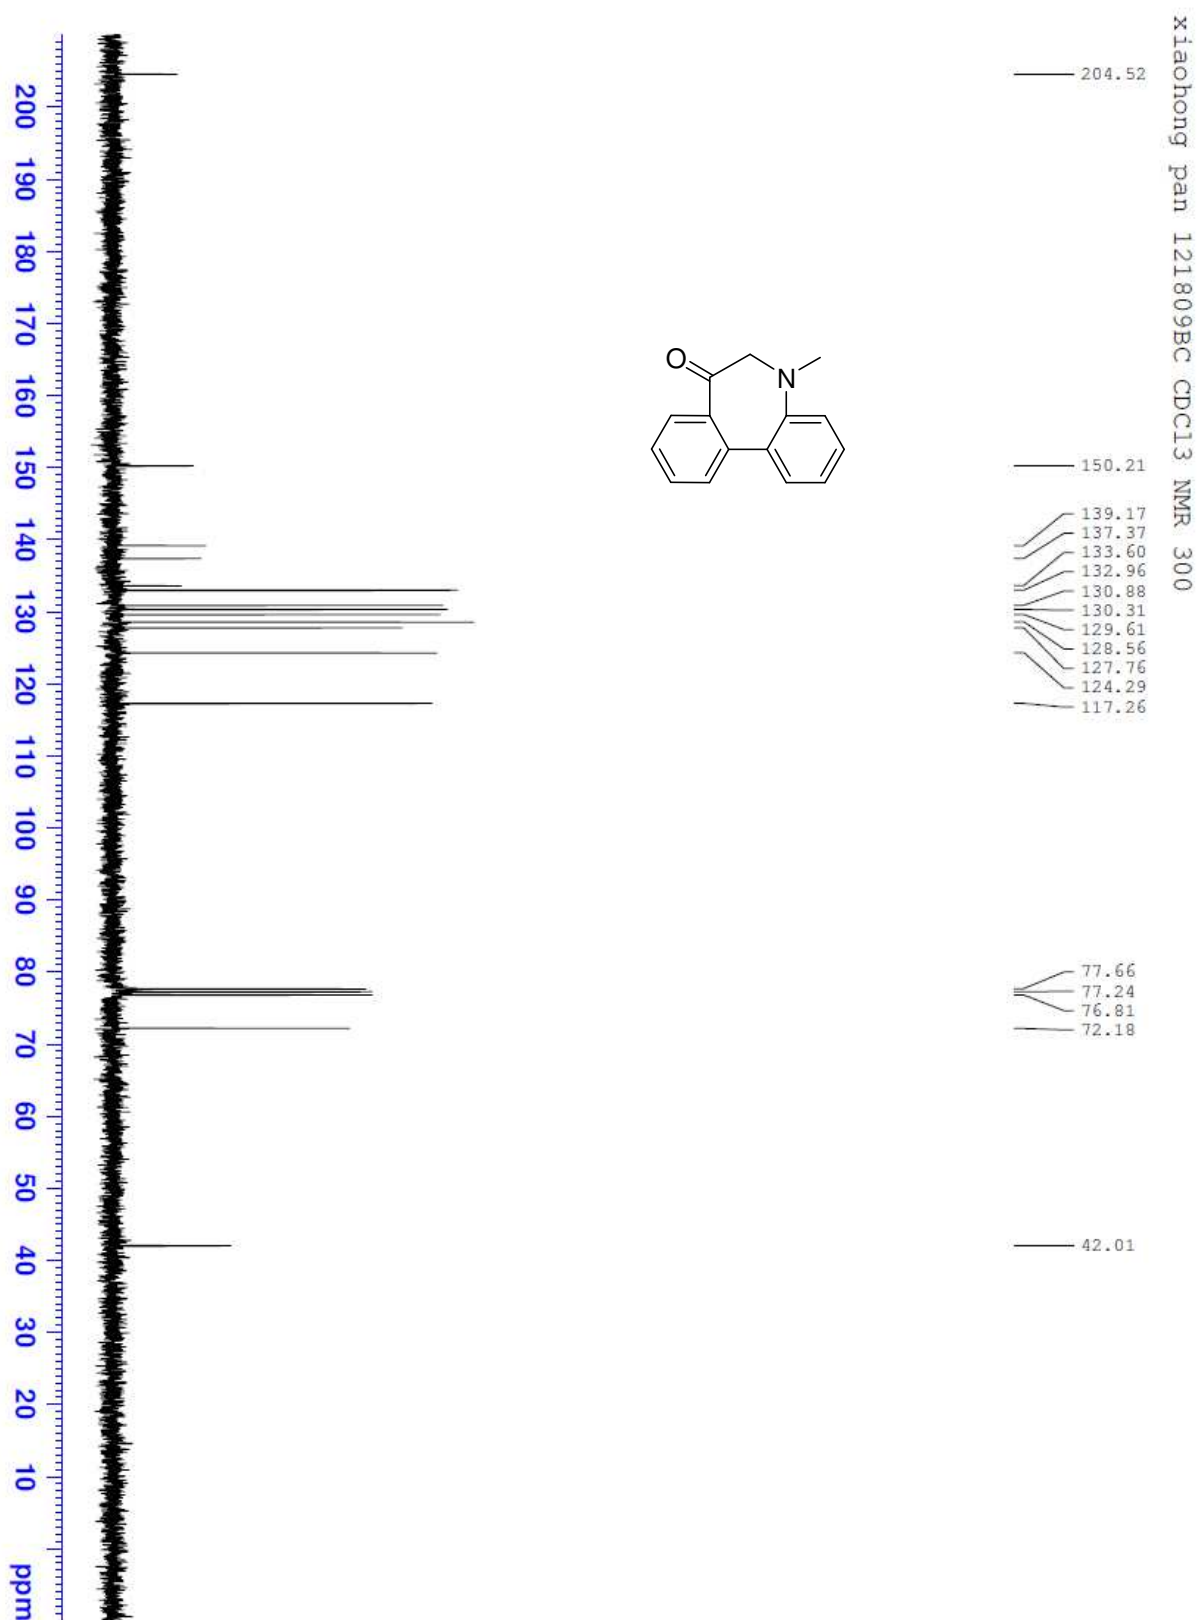

**5-Benzyl-5-hydroxy-*N*-methyl-dihydrodibenzazepine (34).**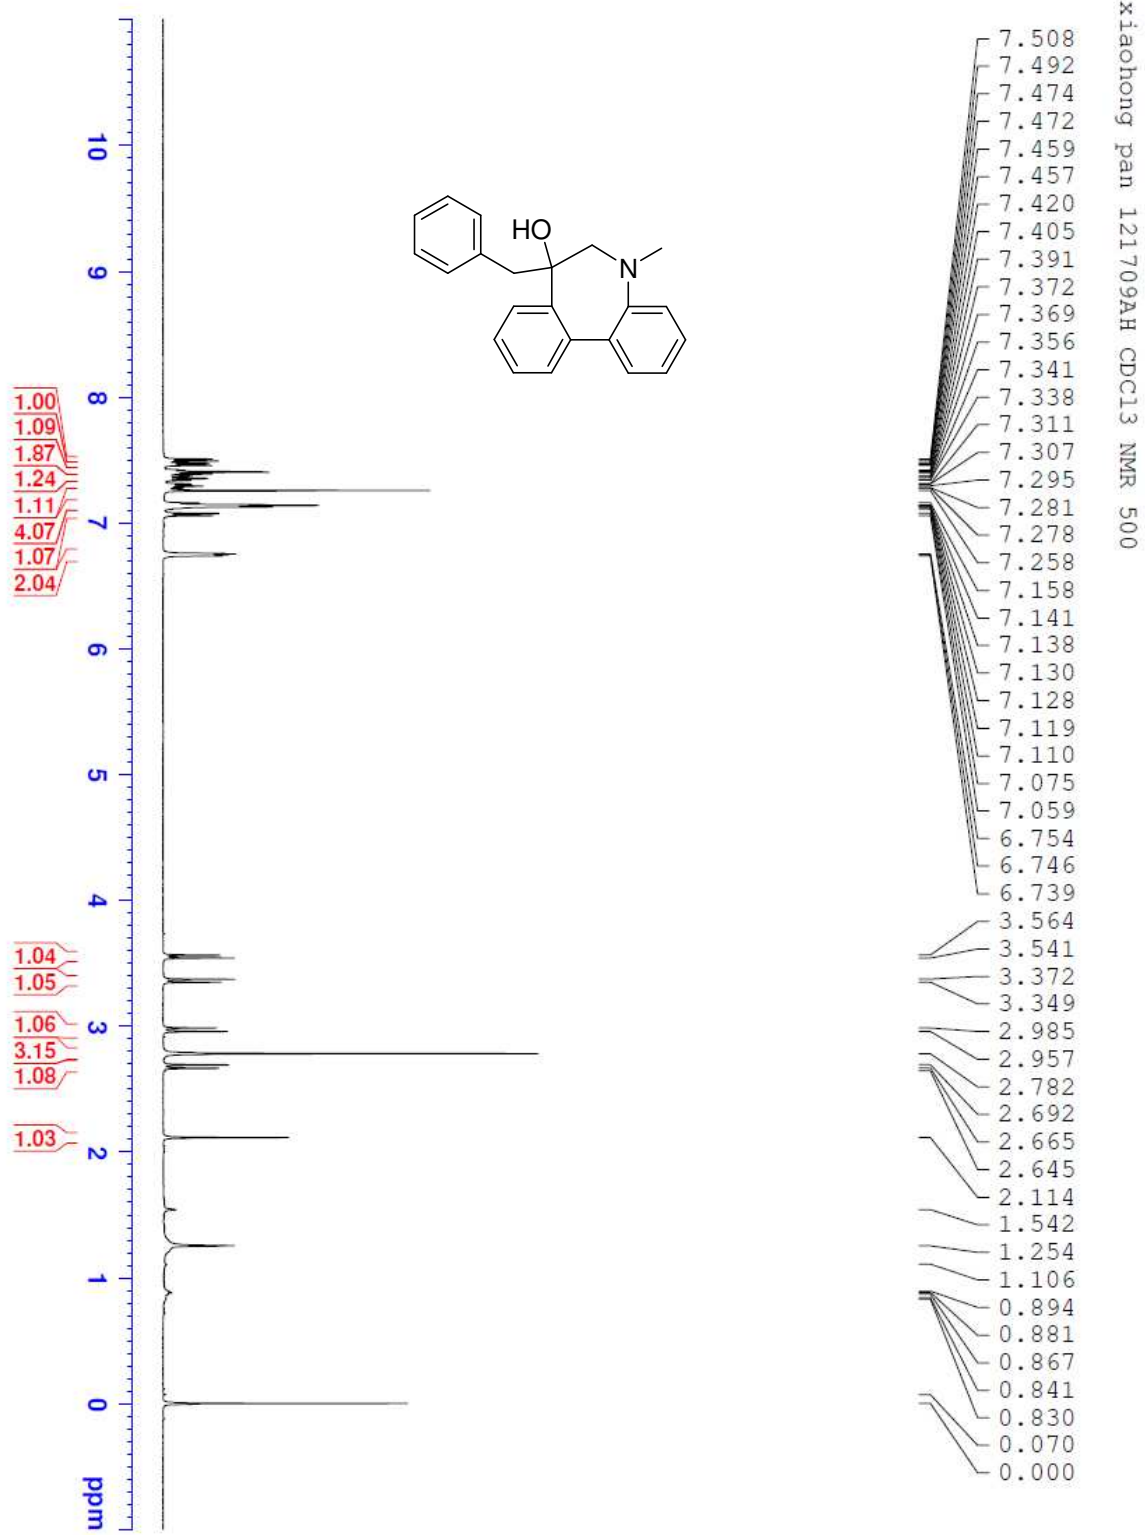

**5-Benzyl-5-hydroxy-*N*-methyl-dihydrodibenzazepine (34).**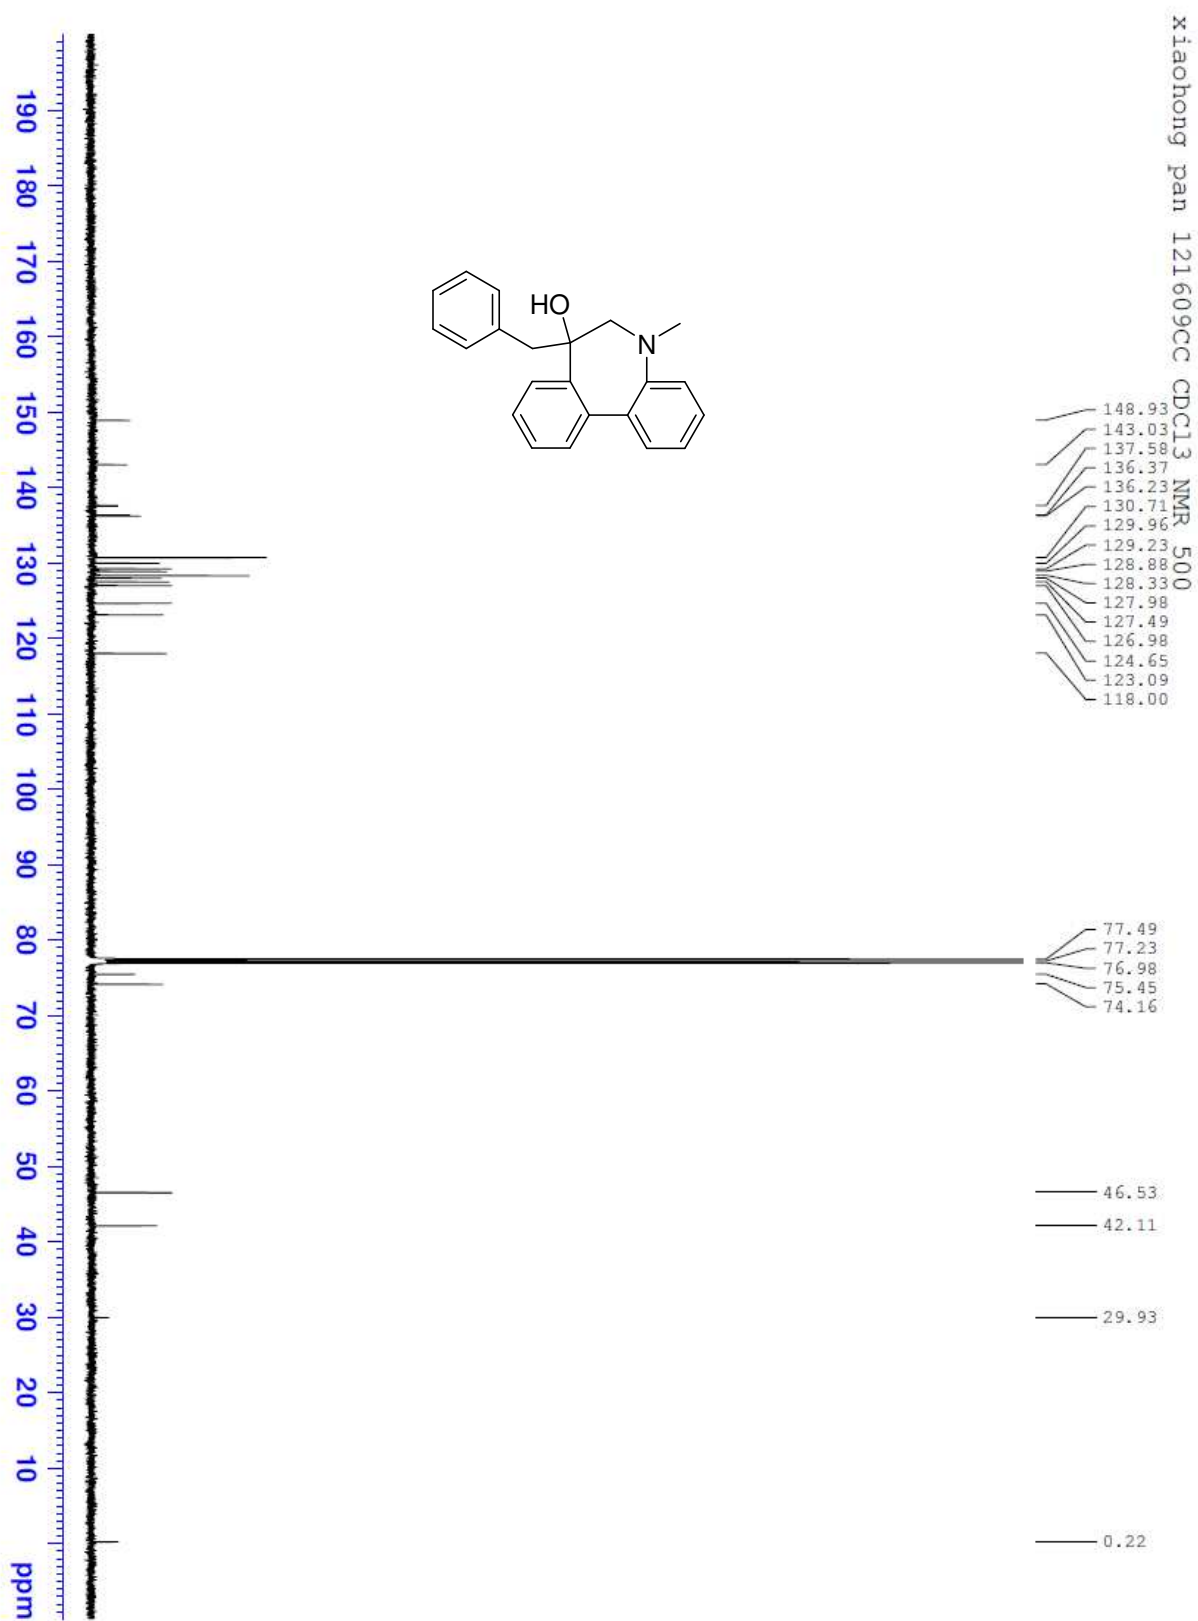

**5-Dibenzylamino-*N*-methyl-dibenzazepin-6-one (35).**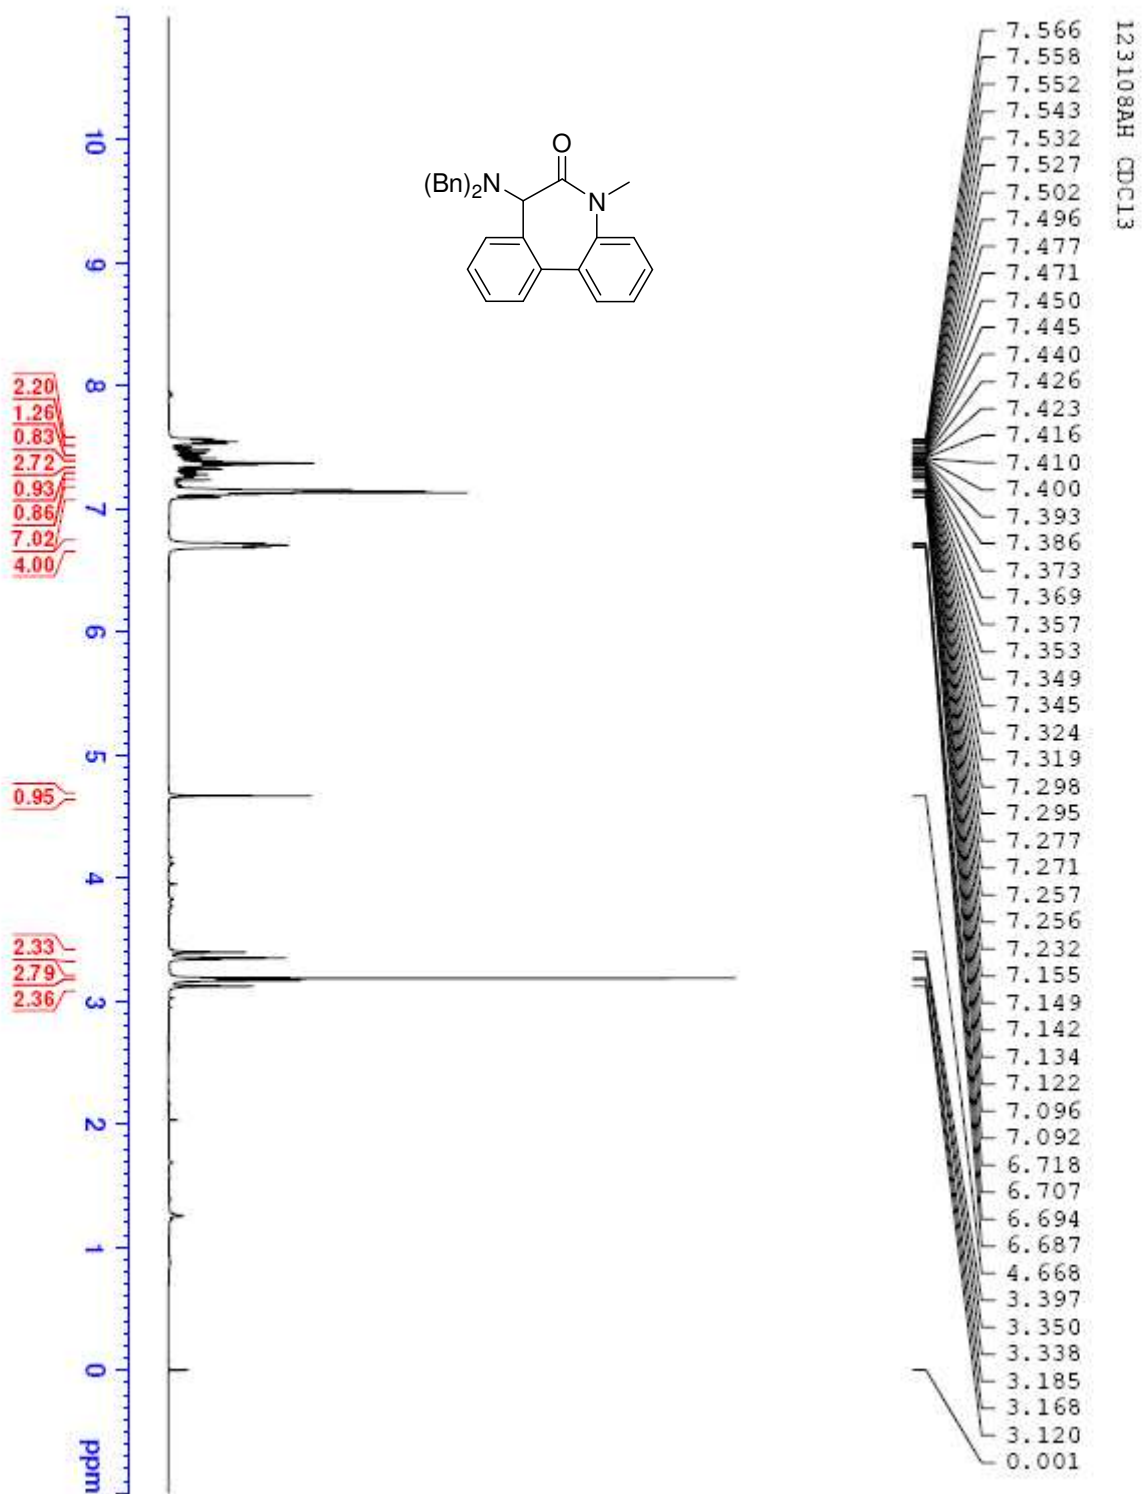

**5-Dibenzylamino-*N*-methyl-dibenzazepin-6-one (35).**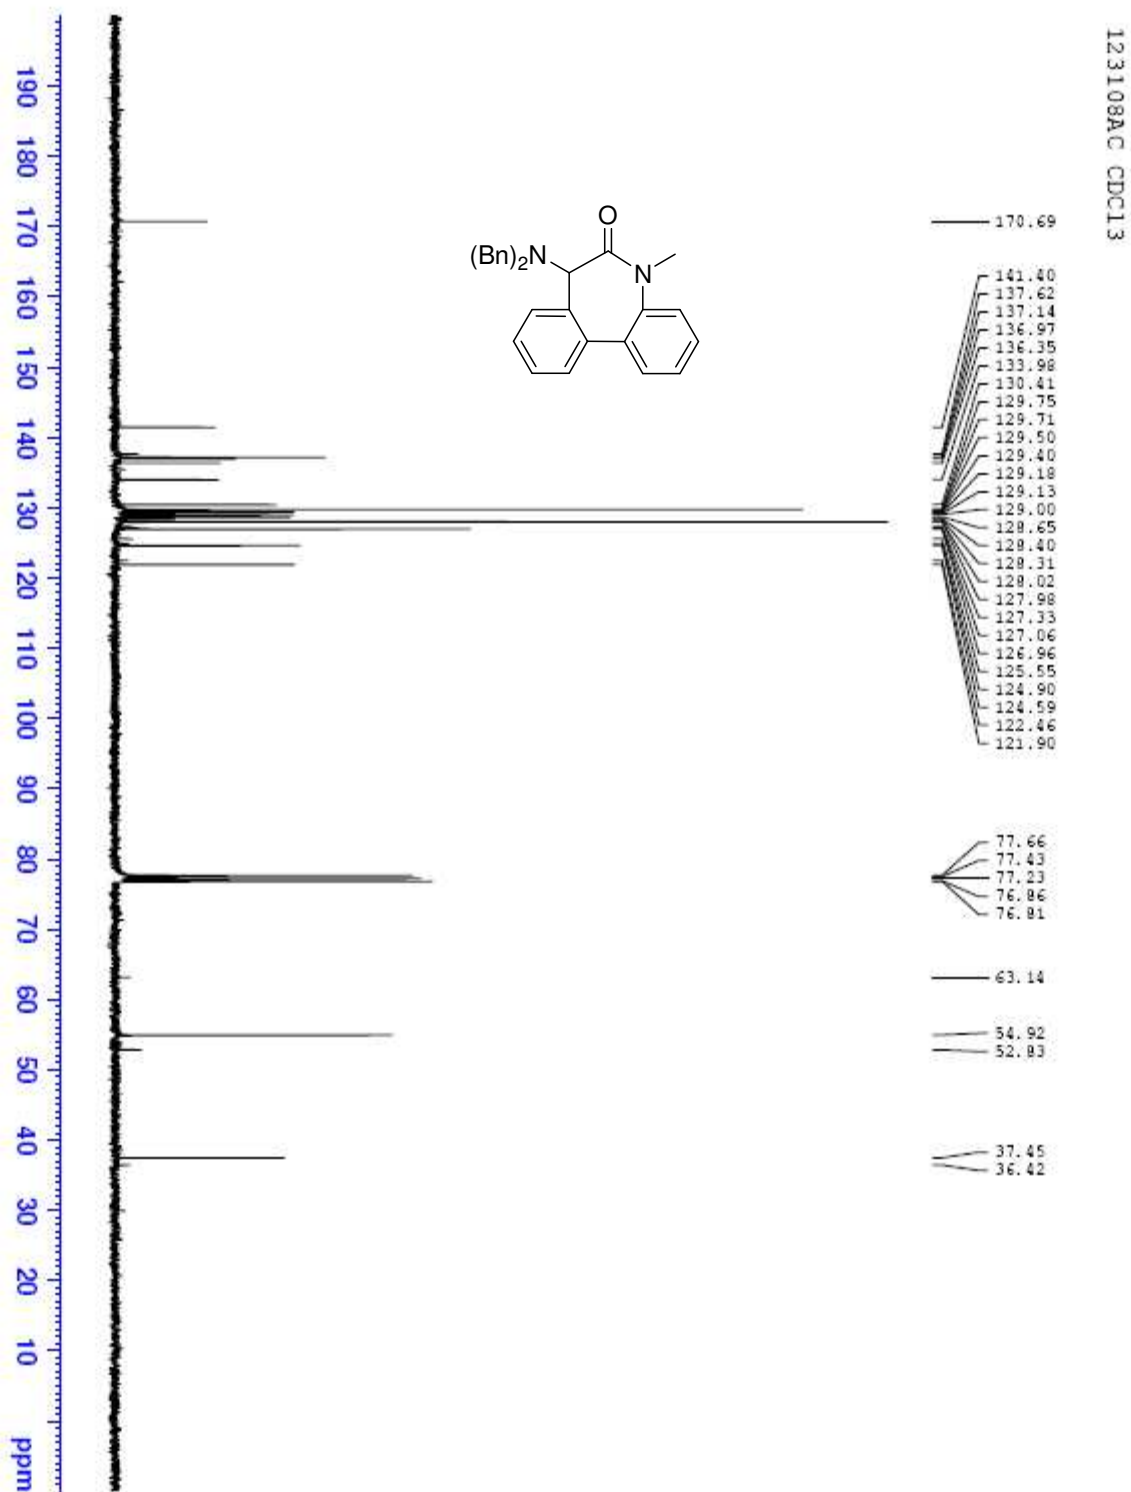

Supplement: Supplementary file 1 [file 4401502]
